# Supplementary material for: Retracing the path of planar cell polarity
Source: PubMed Central journal article supplement (PMC4818920; doi:10.1186/s12862-016-0641-0), 2016-04-02
Supplement: 12862_2016_641_MOESM1_ESM.pdf [file 12862_2016_641_MOESM1_ESM.pdf]

# ADDITIONAL FILE 1: BLAST analyses

---

---

|                                                                                             |    |
|---------------------------------------------------------------------------------------------|----|
| Table S1.1: Database information.....                                                       | p2 |
| Table S1.2: Proteins found in <i>Amphimedon queenslandica</i> (Porifera, Demospongiae)..... | p2 |
| Table S1.3: Proteins found in <i>Aphrocalistes vastus</i> (Porifera, Hexactinellida).....   | p2 |
| Table S1.4: Proteins found in <i>Ephydatia muelleri</i> (Porifera, Demospongiae).....       | p3 |
| Table S1.5: Proteins found in <i>Mnemiopsis leidy</i> (Ctenophora).....                     | p3 |
| Table S1.6: Proteins found in <i>Oopsacas minuta</i> (Porifera, Hexactinellida).....        | p4 |
| Table S1.7: Proteins found in <i>Oscarella carmela</i> (Porifera, Homoscleromorpha).....    | p4 |
| Table S1.8: Proteins found in <i>Oscarella lobularis</i> (Porifera, Homoscleromorpha).....  | p5 |
| Table S1.9: Proteins found in <i>Oscarella sp.</i> (Porifera, Homoscleromorpha).....        | p6 |
| Table S1.10: Proteins found in <i>Salpingoeca rosetta</i> (Choanoflagellata).....           | p7 |
| Table S1.11: Proteins found in <i>Sycon ciliatum</i> (Porifera, Calcarea).....              | p7 |
| Table S1.12: Proteins found in <i>Tricoplax adhaerens</i> (Placozoa).....                   | p8 |

**Table S1.1: Database information.**

| Lineage          | Species                         | Genome          | Transcriptome     |
|------------------|---------------------------------|-----------------|-------------------|
| Choanoflagellata | <i>Salpingoeca rosetta</i>      | Broad institute | Not available     |
| Ctenophora       | <i>Mnemiopsis leidyi</i>        | NHGRI           | Compagen          |
|                  | <i>Pleurobrachia pileu</i>      | Not available   | Compagen          |
| Placozoa         | <i>Trichoplax adhaerens</i>     | Ensembl         | Compagen          |
| Porifera         | <i>Amphimedon queenslandica</i> | Ensembl         | Not available     |
|                  | <i>Aphrocalistes vastus</i>     | Not available   | Ualberta          |
|                  | <i>Ephydatia muelleri</i>       | Not available   | Compagen          |
|                  | <i>Oopsacas minuta</i>          | Not available   | Personal database |
|                  | <i>Oscarella carmela</i>        | Compagen        | Compagen          |
|                  | <i>Oscarella lobularis</i>      | Not available   | Personal database |
|                  | <i>Oscarella sp.</i>            | Not available   | Compagen          |
|                  | <i>Sycon ciliatum</i>           | Compagen        | Compagen          |

Websites: Broad institute, <http://www.broadinstitute.org/>; Compagen, <http://www.compagen.org/>; Ensembl, <http://metazoa.ensembl.org/index.html>; NHGRI, <http://research.nhgri.nih.gov/mnemiopsis/> and Ualberta, <https://era.library.ualberta.ca/public/home>.

**Table S1.2: Proteins found in *Amphimedon queenslandica* (Porifera, Demospongiae).**

| Gene         | Accession or Contig                            | Tblastn top hit                                   |
|--------------|------------------------------------------------|---------------------------------------------------|
| Celsr3L      | Aqu1.224307                                    | Fahey and Degnan, 2010                            |
| Dvl          | NP_001266242.1 (NCBI)                          | Adamska et al., 2010                              |
| Fuz          | contig13228                                    | Xenopus tropicalis Fuz<br>(2e-35; NM_001040017.2) |
| Fzd          | NP_001266206.1 (NCBI)<br>NP_001266202.1 (NCBI) | Adamska et al., 2010                              |
| Intu         | Aqu1.217322<br>Aqu1.214741<br>Aqu1.208411      | Adamska et al., 2010                              |
| Invs1 (Dgo)  | Aqu1.221107 (completed)                        | Adamska et al., 2010                              |
| Invs2 (Invs) | Aqu1.227557                                    | Adamska et al., 2010                              |
| PkTesL       | Aqu1.217773                                    | Adamska et al., 2010                              |
| Vang         | Not found                                      | Adamska et al., 2010                              |

**Table S1.3: Proteins found in *Aphrocalistes vastus* (Porifera, Hexactinellida).**

| Gene   | Accession or Contig                                        | Tblastn top hit                                           |
|--------|------------------------------------------------------------|-----------------------------------------------------------|
| Dvl    | Not found                                                  |                                                           |
| Fmi    | Not found                                                  |                                                           |
| Fuz    | No hit                                                     |                                                           |
| Fzd    | No accession                                               | Riesgo et al., 2014                                       |
| Intu   | comp54332_c0_seq1<br>comp64270_c0_seq1<br>comp2131_c0_seq1 | Echinops telfairi Intu<br>(4e-16; XM_004711858.1)         |
| Invs1  | comp15586_c0_seq1                                          | Saccoglossus kowalevskii Invs<br>(1e-101; XM_006819037.1) |
| Invs2  | comp34481_c0_seq1                                          | Amphimedon queenslandica InvsL<br>(8e-73; XM_011411529.1) |
| PkTesL | comp27734_c0_seq1                                          | Saccoglossus kowalevskii Pk2L<br>(2e-96; GU224218.1)      |
| Vang   | No hit                                                     |                                                           |

**Table S1.4: Proteins found in *Ephydatia muelleri* (Porifera, Demospongiae).**

| Gene   | Accession or Contig      | Tblastn top hit                                           |
|--------|--------------------------|-----------------------------------------------------------|
| Dvl    | comp70341_c0_seq1        | Amphimedon queenslandica Dsh<br>(0.0; NM_001279313.1)     |
| Fmi    | Not found                |                                                           |
| Fuz    | comp58048_c0             | Saccoglossus kowalevskii Fuz<br>(1e-86; XM_006815707.1)   |
| Fzd    | AJE25513.1<br>AJE25514.1 | Schenkelaars et al., 2015                                 |
| Intu   | comp68133_c0             | Sorex araneus Intu<br>(8e-60; XM_004606283.1)             |
| Invs1  | comp54435_c0             | Saccoglossus kowalevskii Invs<br>(0.0; XM_006819037.1)    |
| Invs2  | comp66288_c0             | Saccoglossus kowalevskii Invs<br>(2e-109; GU211213.1)     |
| PkTesL | comp22862_c0             | Amphimedon queenslandica TesL<br>(2e-139; XM_003387784.1) |
| Vang   | Not found                |                                                           |

**Table S1.5: Proteins found in *Mnemiopsis leidyi* (Ctenophora).**

| Gene   | Accession or Contig                | Tblastn top hit                                    |
|--------|------------------------------------|----------------------------------------------------|
| Dsh    | HM448818 (NCBI)                    | Pang et al., 2010                                  |
| Fmi    | Not found                          | Ryan et al., 2013                                  |
| Fy     | ML0181                             | Poecilia reticulata Fuz<br>(6e-10; XM_008434537.1) |
| Fzd    | HM448819 (NCBI)<br>HM448820 (NCBI) | Pang et al., 2010                                  |
| In     | No hit                             |                                                    |
| Invs   | Not found                          |                                                    |
| PkTesL | ML2189                             | Latimeria chalumnae Pk1<br>(2e-71; XM_005993176.1) |
| Vang   | Not found                          | Ryan et al., 2013                                  |

**Table S1.6: Proteins found in *Oopsacas minuta* (Porifera, Hexactinellida).**

| Gene   | Accession or Contig | Tblastn top hit                                           |
|--------|---------------------|-----------------------------------------------------------|
| Dvl    | Not found           |                                                           |
| Fmi    | Not found           |                                                           |
| Fuz    | No hit              |                                                           |
| Fzd    | AJE25510.1 (NCBI)   | Schenkelaars et al., 2015                                 |
| Intu   | KT898945            | Sorex araneus Intu<br>(5e-53; XM_004606283.1)             |
| Invs1  | KT898946            | Saccoglossus kowalevskii Invs<br>(1e-124; XM_006819037.1) |
| Invs2  | KT898947            | Amphimedon queenslandica InvsL<br>(5e-65; XM_011411529.1) |
| PkTesL | KT898948            | Saccoglossus kowalevskii Pk2L<br>(6e-92; GU224218.1)      |
| Vang   | No hit              |                                                           |

**Table S1.7: Proteins found in *Oscarella carmela* (Porifera, Homoscleromorpha).**

| Gene   | Accession or Contig                                         | Tblastn top hit                                         |
|--------|-------------------------------------------------------------|---------------------------------------------------------|
| Dsh    | comp44599_c0_seq1                                           | Lytechinus variegatus Dsh<br>(6e-134; AY624074.1)       |
| Fmi    | comp27089_c0_seq1                                           | Xenopus tropicalis Celsr3<br>(0.0; XM_002933077.2)      |
| Fuz    | comp7117_c0_seq1                                            | Saccoglossus kowalevskii Fuz<br>(5e-72; XM_006815707.1) |
| Fzd    | AJE25507.1 (NCBI)<br>AJE25508.1 (NCBI)<br>AJE25509.1 (NCBI) | Schenkelaars et al., 2015                               |
| Intu   | comp39366_c0_seq9                                           | Egretta garzetta Intu<br>(2e-81; XM_009642227.1)        |
| Invs1  | comp36587_c0_seq1                                           | Saccoglossus kowalevskii Invs<br>(0.0; GU211213.1)      |
| Invs2  | comp33916_c0_seq2                                           | Saccoglossus kowalevskii Invs<br>(7e-80; GU211213.1)    |
| PkTesL | comp26691_c0_seq1                                           | Saccoglossus kowalevskii Pk2L<br>(3e-112; GU224218.1)   |
| Vang   | comp31109_c0_seq5<br>scaffold12158                          | Saccoglossus kowalevskii Stbm<br>(2e-61; GU076129.1)    |

**Table S1.8: Proteins found in *Oscarella lobularis* (Porifera, Homoscleromorpha).**

| Gene   | Accession or Contig                                         | Tblastn top hit                                         |
|--------|-------------------------------------------------------------|---------------------------------------------------------|
| Dvl    | KT898949                                                    | Lytechinus variegatus Dsh<br>(1e-92; AY62407.1)         |
| Fmi    | KT898950                                                    | Xenopus tropicalis Celsr3<br>(0.0; XM_002933077.2)      |
| Fuz    | KT898951                                                    | Saccoglossus kowalevskii Fuz<br>(1e-45; XM_006815707.1) |
| Fzd    | AJE25504.1 (NCBI)<br>AJE25505.1 (NCBI)<br>AJE25506.1 (NCBI) | Schenkelaars et al., 2015                               |
| Intu   | KT898952                                                    | Callorhinchus milii Intu<br>(3e-61; XM_007910682.1)     |
| Invs1  | KT898953                                                    | Saccoglossus kowalevskii Invs<br>(0.0; GU211213.1)      |
| Invs2  | KT898954                                                    | Saccoglossus kowalevskii Invs<br>(1e-85; GU211213.1)    |
| PkTesL | KT898955                                                    | Saccoglossus kowalevskii Pk2L<br>(6e-117; GU224218.1)   |
| Vang   | KT898956                                                    | Hydra magnipapillata VangL1<br>(7e-51; XM_002160130.2)  |

**Table S1.9: Proteins found in *Oscarella* sp. (Porifera, Homoscleromorpha).**

| Gene   | Accession or Contig                                                                                                                                                                                                                                                                                    | Tblastn top hit                                         |
|--------|--------------------------------------------------------------------------------------------------------------------------------------------------------------------------------------------------------------------------------------------------------------------------------------------------------|---------------------------------------------------------|
| Dvl    | comp18085_c0_seq1<br>comp27893_c0_seq1<br>comp18203_c0_seq1<br>comp30186_c0_seq1<br>comp30334_c0_seq1<br>comp75723_c0_seq1                                                                                                                                                                             | Tribolium castaneum Dvl3<br>(1e-118; XM_009068758.1)    |
| Fmi    | Not found                                                                                                                                                                                                                                                                                              |                                                         |
| Fuz    | comp156056_c0_seq1<br>comp76968_c0_seq1<br>comp61620_c0_seq1                                                                                                                                                                                                                                           | Saccoglossus kowalevskii Fuz<br>(1e-07; XM_006815707.1) |
| Fzd    | comp13598_c0_seq1<br>comp20726_c0_seq1                                                                                                                                                                                                                                                                 | Oscarella lobularis FzdB<br>(0.0; KM365031.1)           |
|        | comp16628_c0_seq1                                                                                                                                                                                                                                                                                      | Oscarella lobularis FzdA2<br>(4e-156; KM365030.1)       |
|        | comp4918_c0_seq1                                                                                                                                                                                                                                                                                       | Oscarella carmela FzdA1<br>(0.0; KM365032.1)            |
| Intu   | comp29063_c0_seq1<br>comp77813_c0_seq1<br>comp114481_c0_seq1<br>comp103590_c0_seq1<br>comp37720_c0_seq1<br>comp74551_c0_seq1<br>comp91853_c0_seq1<br>comp82399_c0_seq1<br>comp90976_c0_seq1<br>comp180374_c0_seq1<br>comp75621_c0_seq1<br>comp61285_c0_seq1<br>comp133579_c0_seq1<br>comp38913_c0_seq1 | Nannospalax galili Intu<br>(2e-16; XM_008823687.1)      |
| Invs1  | comp5479_c0_seq1                                                                                                                                                                                                                                                                                       | Saccoglossus kowalevskii Invs<br>(0.0; GU211213.1)      |
| Invs2  | comp14868_c0_seq1                                                                                                                                                                                                                                                                                      | Crassotrea gigas InvsL<br>(1e-85; XM_011416660.1)       |
| PkTesL | comp4801_c0_seq1                                                                                                                                                                                                                                                                                       | Saccoglossus kowalevskii Pk2L<br>(1e-119; GU224218.1)   |
| Vang   | comp32065_c0_seq1<br>comp70883_c0_seq1                                                                                                                                                                                                                                                                 | Musca domestica VangL2<br>(2e-59; XM_005190441.1)       |

**Table S1.10: Proteins found in *Salpingoeca rosetta* (Choanoflagellata).**

| Gene   | Accession or Contig | Tblastn top hit                                       |
|--------|---------------------|-------------------------------------------------------|
| Fuz    | PTSG_02764.1        | Anolis carolinensis Fuz<br>(4e-41; XM_003222723.1)    |
| InL    | PTSG_12265.1        | Capra hircus Intu<br>(0.014; XM_005691271.1)          |
| Invs   | PTSG_12654.1        | Saccoglossus kowalevskii Invs<br>(2e-102; GU211213.1) |
| PkTesL | PTSG_10035.1        | Saccoglossus kowalevskii Pk2L<br>(4e-86; GU224218.1)  |

**Table S1.11: Proteins found in *Sycon ciliatum* (Porifera, Calcarea).**

| Gene   | Accession or Contig                                                              | Tblastn top hit                                          |
|--------|----------------------------------------------------------------------------------|----------------------------------------------------------|
| Dvl    | CDO67914.1 (NCBI)<br>CDO67915.1 (NCBI)                                           | Leininger et al., 2014                                   |
| Fmi    | sctid1773                                                                        | Chrysemys picta bellii Celsr2<br>(0.0; XM_008176079.1)   |
| Fuz    | sctid38004                                                                       | Saccoglossus kowalevskii Fuz<br>(2e-101; XM_006815707.1) |
| Fzd    | CDO67909.1 (NCBI)<br>CDO67910.1 (NCBI)<br>CDO67911.1 (NCBI)<br>CDO67912.1 (NCBI) | Leininger et al., 2014                                   |
| Intu   | sctid17446                                                                       | Sarcophilus harrisii Intu<br>(1e-86; XM_003772754.1)     |
| Invs1  | sctid33564                                                                       | Saccoglossus kowalevskii Invs<br>(2e-81; GU211213.1)     |
| Invs2  | sctid23651                                                                       | Saccoglossus kowalevskii Invs<br>(0.0; XM_006819037.1)   |
| PkTesL | sctid62610                                                                       | Saccoglossus kowalevskii Pk2L<br>(4e-86; GU224218.1)     |
| Vang   | Not found                                                                        |                                                          |

**Table S1.12: Proteins found in *Tricoplax adhaerens* (Placozoa).**

| Gene  | Accession or Contig                    | Tblastn top hit                                         |
|-------|----------------------------------------|---------------------------------------------------------|
| Celsr | XM_002118173.1 (NCBI)                  | Hulpiau and van Roy, 2011                               |
| Dsh   | No accession                           | Scrivastava et al., 2008                                |
| Fy    | Scaffold 1                             | Saccoglossus kowalevskii Fuz<br>(6e-64; XM_002108011.1) |
| Fzd   | AJE25511.1 (NCBI)<br>AJE25512.1 (NCBI) | Schenkelaars et al., 2015                               |
| In    | Scaffold 5                             | Taeniopygia guttata Intu<br>(1e-64, XM_004176709.1)     |
| Invs  | Not found                              |                                                         |
| Pk    | Scaffold 5                             | Saccoglossus kowalevskii Pk2L<br>(2e-126; GU224218.1)   |
| Vang  | Scaffold 1                             | Apis dorsata VangL2<br>(5e-81; XM_001630370.1)          |
