# Supplementary material for: Retracing the path of planar cell polarity
Source: PubMed Central journal article supplement (PMC4818920; doi:10.1186/s12862-016-0641-0), 2016-04-02
Supplement: 12862_2016_641_MOESM2_ESM.pdf [file 12862_2016_641_MOESM2_ESM.pdf]

# ADDITIONAL FILE 2: Sequence analyses

---

---

|                                                                                       |     |
|---------------------------------------------------------------------------------------|-----|
| Table S2.1: Flamingo/Celsr/Stan sequence identity matrix.....                         | p2  |
| Table S2.2: Fuzzy sequence identity matrix .....                                      | p3  |
| Table S2.3: Inturned sequence identity matrix.....                                    | p4  |
| Table S2.4: Inversin sequence identity matrix.....                                    | p6  |
| Table S2.5: PET family sequence identity matrix.....                                  | p10 |
| Table S2.6: Strabismus/Van Gogh Stan sequence identity matrix .....                   | p12 |
|                                                                                       |     |
| Figure S2.1: Flamingo/Celsr/Stan alignment.....                                       | p13 |
| Figure S2.2: Fuzzy alignment.....                                                     | p32 |
| Figure S2.3: Inturned alignment.....                                                  | p34 |
| Figure S2.4: Inversin alignment.....                                                  | p40 |
| Figure S2.5: PET family alignment.....                                                | p52 |
| Figure S2.6: Strabismus/Van Gogh alignment.....                                       | p66 |
| Figure S2.7: Maximum likelihood unrooted tree of PET family.....                      | p68 |
| Figure S2.8: Bayesian unrooted tree of PET family.....                                | p69 |
| Figure S2.9: Intro/exon composition of <i>flamingo</i> in <i>Sycon ciliatum</i> ..... | p70 |
| Figure S2.10: Alternative scenario 1 of the PCP players during animal evolution.....  | p71 |
| Figure S2.11: Alternative scenario 2 of the PCP players during animal evolution.....  | p71 |
| Figure S2.12: Alternative scenario 3 of the PCP players during animal evolution.....  | p72 |

**Table S2.1: Flamingo/Celsr/Stan sequence identity matrix.** Obtained using bioedit software.

| Seq->     | MmCelsr1 | DrCelsr1b | DrCelsr1a | MmCelsr2 | DrCelsr2 | MmCelsr3 | DrCelsr3 |
|-----------|----------|-----------|-----------|----------|----------|----------|----------|
| MmCelsr1  | ID       | 0,596     | 0,609     | 0,539    | 0,52     | 0,431    | 0,262    |
| DrCelsr1b | 0,596    | ID        | 0,702     | 0,516    | 0,528    | 0,427    | 0,267    |
| DrCelsr1a | 0,609    | 0,702     | ID        | 0,522    | 0,535    | 0,431    | 0,264    |
| MmCelsr2  | 0,539    | 0,516     | 0,522     | ID       | 0,605    | 0,442    | 0,269    |
| DrCelsr2  | 0,52     | 0,528     | 0,535     | 0,605    | ID       | 0,43     | 0,257    |
| MmCelsr3  | 0,431    | 0,427     | 0,431     | 0,442    | 0,43     | ID       | 0,351    |
| DrCelsr3  | 0,262    | 0,267     | 0,264     | 0,269    | 0,257    | 0,351    | ID       |
| DmStan    | 0,29     | 0,287     | 0,285     | 0,279    | 0,286    | 0,284    | 0,161    |
| ChFmi     | 0,235    | 0,241     | 0,248     | 0,234    | 0,25     | 0,207    | 0,127    |
| TaCelsr   | 0,264    | 0,269     | 0,271     | 0,257    | 0,255    | 0,25     | 0,137    |
| OcFmi     | 0,217    | 0,215     | 0,213     | 0,212    | 0,213    | 0,203    | 0,116    |
| OIFmi     | 0,227    | 0,219     | 0,225     | 0,216    | 0,222    | 0,198    | 0,102    |
| ScFmi     | 0,184    | 0,181     | 0,178     | 0,194    | 0,179    | 0,173    | 0,099    |
| AqCelsr3L | 0,127    | 0,129     | 0,136     | 0,131    | 0,128    | 0,122    | 0,092    |

| Seq->     | DmStan | ChFmi | TaCelsr | OcFmi | OIFmi | ScFmi | AqCelsr3L |
|-----------|--------|-------|---------|-------|-------|-------|-----------|
| MmCelsr1  | 0,29   | 0,235 | 0,264   | 0,217 | 0,227 | 0,184 | 0,127     |
| DrCelsr1b | 0,287  | 0,241 | 0,269   | 0,215 | 0,219 | 0,181 | 0,129     |
| DrCelsr1a | 0,285  | 0,248 | 0,271   | 0,213 | 0,225 | 0,178 | 0,136     |
| MmCelsr2  | 0,279  | 0,234 | 0,257   | 0,212 | 0,216 | 0,194 | 0,131     |
| DrCelsr2  | 0,286  | 0,25  | 0,255   | 0,213 | 0,222 | 0,179 | 0,128     |
| MmCelsr3  | 0,284  | 0,207 | 0,25    | 0,203 | 0,198 | 0,173 | 0,122     |
| DrCelsr3  | 0,161  | 0,127 | 0,137   | 0,116 | 0,102 | 0,099 | 0,092     |
| DmStan    | ID     | 0,192 | 0,225   | 0,181 | 0,184 | 0,151 | 0,113     |
| ChFmi     | 0,192  | ID    | 0,214   | 0,185 | 0,197 | 0,159 | 0,117     |
| TaCelsr   | 0,225  | 0,214 | ID      | 0,202 | 0,199 | 0,17  | 0,126     |
| OcFmi     | 0,181  | 0,185 | 0,202   | ID    | 0,545 | 0,197 | 0,132     |
| OIFmi     | 0,184  | 0,197 | 0,199   | 0,545 | ID    | 0,196 | 0,126     |
| ScFmi     | 0,151  | 0,159 | 0,17    | 0,197 | 0,196 | ID    | 0,127     |
| AqCelsr3L | 0,113  | 0,117 | 0,126   | 0,132 | 0,126 | 0,127 | ID        |

Abbreviations. Vertebrate: Dr, *Danio rerio* and Mm, *Mus musculus*. Hexapoda: Dm, *Drosophila melanogaster*. Cnidaria: Ch, *Clytia hemisphaerica*. Placozoa: Ta, *Trichoplax adhaerens*. Porifera: Aq, *Amphimedon queenslandica*; Oc, *Oscarella carmela*; OI, *Oscarella lobularis*; Sc, *Sycon ciliatum*.

**Table S2.2: Fuzzy sequence identity matrix.** Obtained using bioedit software.

| Seq->  | DrFuz | MmFuz | DmFy  | ChFy  | TaFy  | OcFuz | OIFuz |
|--------|-------|-------|-------|-------|-------|-------|-------|
| DrFuz  | ID    | 0,436 | 0,219 | 0,245 | 0,23  | 0,272 | 0,248 |
| MmFuz  | 0,436 | ID    | 0,216 | 0,244 | 0,201 | 0,247 | 0,224 |
| DmFy   | 0,219 | 0,216 | ID    | 0,166 | 0,168 | 0,214 | 0,22  |
| ChFy   | 0,245 | 0,244 | 0,166 | ID    | 0,162 | 0,18  | 0,161 |
| TaFy   | 0,23  | 0,201 | 0,168 | 0,162 | ID    | 0,185 | 0,181 |
| OcFuz  | 0,272 | 0,247 | 0,214 | 0,18  | 0,185 | ID    | 0,587 |
| OIFuz  | 0,248 | 0,224 | 0,22  | 0,161 | 0,181 | 0,587 | ID    |
| OspFuz | 0,082 | 0,075 | 0,071 | 0,097 | 0,065 | 0,144 | 0,174 |
| ScFuz  | 0,262 | 0,273 | 0,195 | 0,173 | 0,228 | 0,309 | 0,259 |
| AqFuz  | 0,211 | 0,219 | 0,168 | 0,182 | 0,162 | 0,222 | 0,199 |
| EmFuz  | 0,275 | 0,275 | 0,209 | 0,18  | 0,262 | 0,291 | 0,263 |
| MIFy   | 0,153 | 0,14  | 0,132 | 0,116 | 0,146 | 0,168 | 0,182 |
| SrFy   | 0,195 | 0,215 | 0,158 | 0,146 | 0,144 | 0,196 | 0,19  |

| Seq->  | OspFuz | ScFuz | AqFuz | EmFuz | MIFy  | SrFy  |
|--------|--------|-------|-------|-------|-------|-------|
| DrFuz  | 0,082  | 0,262 | 0,211 | 0,275 | 0,153 | 0,195 |
| MmFuz  | 0,075  | 0,273 | 0,219 | 0,275 | 0,14  | 0,215 |
| DmFy   | 0,071  | 0,195 | 0,168 | 0,209 | 0,132 | 0,158 |
| ChFy   | 0,097  | 0,173 | 0,182 | 0,18  | 0,116 | 0,146 |
| TaFy   | 0,065  | 0,228 | 0,162 | 0,262 | 0,146 | 0,144 |
| OcFuz  | 0,144  | 0,309 | 0,222 | 0,291 | 0,168 | 0,196 |
| OIFuz  | 0,174  | 0,259 | 0,199 | 0,263 | 0,182 | 0,19  |
| OspFuz | ID     | 0,09  | 0,116 | 0,077 | 0,055 | 0,084 |
| ScFuz  | 0,09   | ID    | 0,248 | 0,341 | 0,171 | 0,224 |
| AqFuz  | 0,116  | 0,248 | ID    | 0,308 | 0,11  | 0,194 |
| EmFuz  | 0,077  | 0,341 | 0,308 | ID    | 0,152 | 0,193 |
| MIFy   | 0,055  | 0,171 | 0,11  | 0,152 | ID    | 0,099 |
| SrFy   | 0,084  | 0,224 | 0,194 | 0,193 | 0,099 | ID    |

Abbreviations. Vertebrate: Dr, *Danio rerio* and Mm, *Mus musculus*. Hexapoda: Dm, *Drosophila melanogaster*. Cnidaria: Ch, *Clytia hemisphaerica*. Placozoa: Ta, *Trichoplax adhaerens*. Porifera: Aq, *Amphimedon queenslandica*; Em, *Ephydatia muelleri*; Oc, *Oscarella carmela*; Ol, *Oscarella lobularis*; Osp, *Oscarella sp.*; Sc, *Sycon ciliatum*. Ctenophora: MI, *Mnemiopsis leidyi*. Choanoflagellata: Sr, *Salpingoeca rosetta*.

**Table S2.3: Inturned sequence identity matrix.** Obtained using bioedit software.

| Seq->   | MmIntu | DrIntu | DmIn  | Spln  | Lcln  | Smln  | ChIn  |
|---------|--------|--------|-------|-------|-------|-------|-------|
| MmIntu  | ID     | 0,477  | 0,161 | 0,328 | 0,572 | 0,183 | 0,19  |
| DrIntu  | 0,477  | ID     | 0,161 | 0,321 | 0,512 | 0,184 | 0,196 |
| DmIn    | 0,161  | 0,161  | ID    | 0,157 | 0,146 | 0,119 | 0,129 |
| Spln    | 0,328  | 0,321  | 0,157 | ID    | 0,312 | 0,178 | 0,183 |
| Lcln    | 0,572  | 0,512  | 0,146 | 0,312 | ID    | 0,173 | 0,176 |
| Smln    | 0,183  | 0,184  | 0,119 | 0,178 | 0,173 | ID    | 0,117 |
| ChIn    | 0,19   | 0,196  | 0,129 | 0,183 | 0,176 | 0,117 | ID    |
| Taln    | 0,172  | 0,185  | 0,135 | 0,174 | 0,169 | 0,129 | 0,152 |
| Osplntu | 0,142  | 0,139  | 0,081 | 0,134 | 0,126 | 0,109 | 0,128 |
| Oclntu  | 0,222  | 0,233  | 0,145 | 0,208 | 0,21  | 0,14  | 0,19  |
| Ollntu  | 0,211  | 0,216  | 0,137 | 0,185 | 0,186 | 0,129 | 0,18  |
| ScIntu  | 0,199  | 0,185  | 0,123 | 0,193 | 0,197 | 0,125 | 0,169 |
| Emlntu  | 0,2    | 0,174  | 0,133 | 0,178 | 0,17  | 0,112 | 0,173 |
| Aqlntu  | 0,179  | 0,17   | 0,126 | 0,163 | 0,161 | 0,1   | 0,152 |
| AvIntu  | 0,085  | 0,079  | 0,057 | 0,078 | 0,086 | 0,069 | 0,075 |
| Omlntu  | 0,172  | 0,167  | 0,12  | 0,157 | 0,171 | 0,121 | 0,153 |
| SrInL   | 0,081  | 0,096  | 0,087 | 0,076 | 0,07  | 0,062 | 0,078 |

| Seq->   | Taln  | Osplntu | Oclntu | Ollntu | ScIntu | Emlntu | Aqlntu |
|---------|-------|---------|--------|--------|--------|--------|--------|
| MmIntu  | 0,172 | 0,142   | 0,222  | 0,211  | 0,199  | 0,2    | 0,179  |
| DrIntu  | 0,185 | 0,139   | 0,233  | 0,216  | 0,185  | 0,174  | 0,17   |
| DmIn    | 0,135 | 0,081   | 0,145  | 0,137  | 0,123  | 0,133  | 0,126  |
| Spln    | 0,174 | 0,134   | 0,208  | 0,185  | 0,193  | 0,178  | 0,163  |
| Lcln    | 0,169 | 0,126   | 0,21   | 0,186  | 0,197  | 0,17   | 0,161  |
| Smln    | 0,129 | 0,109   | 0,14   | 0,129  | 0,125  | 0,112  | 0,1    |
| ChIn    | 0,152 | 0,128   | 0,19   | 0,18   | 0,169  | 0,173  | 0,152  |
| Taln    | ID    | 0,122   | 0,163  | 0,152  | 0,149  | 0,145  | 0,135  |
| Osplntu | 0,122 | ID      | 0,384  | 0,44   | 0,148  | 0,124  | 0,111  |
| Oclntu  | 0,163 | 0,384   | ID     | 0,632  | 0,222  | 0,183  | 0,186  |
| Ollntu  | 0,152 | 0,44    | 0,632  | ID     | 0,197  | 0,177  | 0,175  |
| ScIntu  | 0,149 | 0,148   | 0,222  | 0,197  | ID     | 0,178  | 0,144  |
| Emlntu  | 0,145 | 0,124   | 0,183  | 0,177  | 0,178  | ID     | 0,224  |
| Aqlntu  | 0,135 | 0,111   | 0,186  | 0,175  | 0,144  | 0,224  | ID     |
| AvIntu  | 0,05  | 0,232   | 0,073  | 0,074  | 0,072  | 0,066  | 0,06   |
| Omlntu  | 0,12  | 0,117   | 0,173  | 0,159  | 0,172  | 0,153  | 0,146  |
| SrInL   | 0,073 | 0,078   | 0,096  | 0,092  | 0,068  | 0,079  | 0,083  |

| Seq->   | AvIntu | OmIntu | SrInL |
|---------|--------|--------|-------|
| MmIntu  | 0,085  | 0,172  | 0,081 |
| DrIntu  | 0,079  | 0,167  | 0,096 |
| DmIn    | 0,057  | 0,12   | 0,087 |
| SpIn    | 0,078  | 0,157  | 0,076 |
| LcIn    | 0,086  | 0,171  | 0,07  |
| Smln    | 0,069  | 0,121  | 0,062 |
| ChIn    | 0,075  | 0,153  | 0,078 |
| Taln    | 0,05   | 0,12   | 0,073 |
| Osplntu | 0,232  | 0,117  | 0,078 |
| Oclntu  | 0,073  | 0,173  | 0,096 |
| Ollntu  | 0,074  | 0,159  | 0,092 |
| ScIntu  | 0,072  | 0,172  | 0,068 |
| EmIntu  | 0,066  | 0,153  | 0,079 |
| AqIntu  | 0,06   | 0,146  | 0,083 |
| AvIntu  | ID     | 0,245  | 0,037 |
| OmIntu  | 0,245  | ID     | 0,076 |
| SrInL   | 0,037  | 0,076  | ID    |

Abbreviations. Vertebrate: Dr, *Danio rerio*; Lc, *Latimeria chalumnae* and Mm, *Mus musculus*. Hexapoda: Dm, *Drosophila melanogaster*. Ambulacraria. Sp, *Strongylocentrotus purpuratus*. Cnidaria: Ch, *Clytia hemisphaerica*; Nv, *Nematostella vectensis*. Placozoa: Ta, *Trichoplax adhaerens*. Porifera: Aq, *Amphimedon queenslandica*; Av, *Aphrocalistes vastus*; Em, *Ephydatia muelleri*; Oc, *Oscarella carmela*; Ol, *Oscarella lobularis*; Om, *Oopsacas minuta*; Osp, *Oscarella sp.*; Sc, *Sycon ciliatum*. Ctenophora: MI, *Mnemiopsis leidyi*. Choanoflagellata: Sr, *Salpingoeca rosetta*.

**Table S2.4: Inversin sequence identity matrix.** Obtained using bioedit software.

| Seq->     | MmInvs | DrlInvs | HplInvsL | SkInvs | AcInvs | ChDgo | OclInvs1 |
|-----------|--------|---------|----------|--------|--------|-------|----------|
| MmInvs    | ID     | 0,514   | 0,341    | 0,359  | 0,308  | 0,211 | 0,281    |
| DrlInvs   | 0,514  | ID      | 0,346    | 0,356  | 0,313  | 0,21  | 0,291    |
| HplInvsL  | 0,341  | 0,346   | ID       | 0,52   | 0,364  | 0,211 | 0,362    |
| SkInvs    | 0,359  | 0,356   | 0,52     | ID     | 0,388  | 0,228 | 0,408    |
| AcInvs    | 0,308  | 0,313   | 0,364    | 0,388  | ID     | 0,182 | 0,305    |
| ChDgo     | 0,211  | 0,21    | 0,211    | 0,228  | 0,182  | ID    | 0,223    |
| OclInvs1  | 0,281  | 0,291   | 0,362    | 0,408  | 0,305  | 0,223 | ID       |
| OllInvs1  | 0,289  | 0,293   | 0,364    | 0,411  | 0,306  | 0,221 | 0,863    |
| OsplInvs1 | 0,283  | 0,286   | 0,361    | 0,408  | 0,304  | 0,223 | 0,808    |
| ScInvs1   | 0,257  | 0,277   | 0,346    | 0,367  | 0,287  | 0,229 | 0,472    |
| AqlInvs1  | 0,227  | 0,239   | 0,29     | 0,322  | 0,244  | 0,217 | 0,392    |
| EmlInvs1  | 0,242  | 0,257   | 0,338    | 0,354  | 0,268  | 0,218 | 0,425    |
| AvInvs1   | 0,182  | 0,175   | 0,215    | 0,251  | 0,176  | 0,171 | 0,26     |
| OmlInvs1  | 0,178  | 0,186   | 0,224    | 0,255  | 0,197  | 0,182 | 0,283    |
| OclInvs2  | 0,165  | 0,177   | 0,197    | 0,208  | 0,162  | 0,146 | 0,212    |
| OllInvs2  | 0,175  | 0,191   | 0,185    | 0,194  | 0,158  | 0,145 | 0,215    |
| OsplInvs2 | 0,183  | 0,191   | 0,188    | 0,194  | 0,154  | 0,138 | 0,215    |
| ScInvs2   | 0,158  | 0,166   | 0,166    | 0,183  | 0,138  | 0,148 | 0,183    |
| AqlInvs2  | 0,173  | 0,179   | 0,192    | 0,195  | 0,16   | 0,152 | 0,206    |
| EmlInvs2  | 0,197  | 0,199   | 0,188    | 0,203  | 0,16   | 0,175 | 0,212    |
| AvInvs2   | 0,154  | 0,162   | 0,156    | 0,171  | 0,132  | 0,151 | 0,177    |
| OmlInvs2  | 0,157  | 0,168   | 0,166    | 0,185  | 0,143  | 0,154 | 0,185    |
| SrlnL     | 0,196  | 0,196   | 0,21     | 0,222  | 0,177  | 0,187 | 0,22     |

| Seq->    | Ollnvs1 | Osplnvs1 | ScInvs1 | Aqlnvs1 | Emlnvs1 | Avlnvs1 | Omlnvs1 |
|----------|---------|----------|---------|---------|---------|---------|---------|
| Mmlnvs   | 0,289   | 0,283    | 0,257   | 0,227   | 0,242   | 0,182   | 0,178   |
| DrInvs   | 0,293   | 0,286    | 0,277   | 0,239   | 0,257   | 0,175   | 0,186   |
| HplnvsL  | 0,364   | 0,361    | 0,346   | 0,29    | 0,338   | 0,215   | 0,224   |
| SkInvs   | 0,411   | 0,408    | 0,367   | 0,322   | 0,354   | 0,251   | 0,255   |
| AcInvs   | 0,306   | 0,304    | 0,287   | 0,244   | 0,268   | 0,176   | 0,197   |
| ChDgo    | 0,221   | 0,223    | 0,229   | 0,217   | 0,218   | 0,171   | 0,182   |
| Oclnvs1  | 0,863   | 0,808    | 0,472   | 0,392   | 0,425   | 0,26    | 0,283   |
| Ollnvs1  | ID      | 0,863    | 0,466   | 0,391   | 0,438   | 0,263   | 0,286   |
| Osplnvs1 | 0,863   | ID       | 0,466   | 0,389   | 0,427   | 0,26    | 0,288   |
| ScInvs1  | 0,466   | 0,466    | ID      | 0,359   | 0,393   | 0,25    | 0,283   |
| Aqlnvs1  | 0,391   | 0,389    | 0,359   | ID      | 0,483   | 0,282   | 0,304   |
| Emlnvs1  | 0,438   | 0,427    | 0,393   | 0,483   | ID      | 0,297   | 0,295   |
| Avlnvs1  | 0,263   | 0,26     | 0,25    | 0,282   | 0,297   | ID      | 0,481   |
| Omlnvs1  | 0,286   | 0,288    | 0,283   | 0,304   | 0,295   | 0,481   | ID      |
| Oclnvs2  | 0,219   | 0,209    | 0,206   | 0,197   | 0,188   | 0,175   | 0,177   |
| Ollnvs2  | 0,222   | 0,212    | 0,198   | 0,189   | 0,2     | 0,173   | 0,175   |
| Osplnvs2 | 0,224   | 0,208    | 0,198   | 0,195   | 0,218   | 0,172   | 0,185   |
| ScInvs2  | 0,182   | 0,186    | 0,188   | 0,194   | 0,199   | 0,16    | 0,165   |
| Aqlnvs2  | 0,205   | 0,2      | 0,201   | 0,184   | 0,205   | 0,17    | 0,166   |
| Emlnvs2  | 0,217   | 0,211    | 0,215   | 0,196   | 0,197   | 0,159   | 0,153   |
| Avlnvs2  | 0,174   | 0,174    | 0,178   | 0,161   | 0,162   | 0,152   | 0,15    |
| Omlnvs2  | 0,187   | 0,183    | 0,202   | 0,178   | 0,191   | 0,167   | 0,166   |
| SrInL    | 0,226   | 0,221    | 0,225   | 0,202   | 0,227   | 0,168   | 0,169   |

| Seq->    | Oclnvs2 | Ollnvs2 | Osplnvs2 | Sclnvs2 | Aqlnvs2 | Emlnvs2 | Avlnvs2 |
|----------|---------|---------|----------|---------|---------|---------|---------|
| Mmlnvs   | 0,165   | 0,175   | 0,183    | 0,158   | 0,173   | 0,197   | 0,154   |
| Drlnvs   | 0,177   | 0,191   | 0,191    | 0,166   | 0,179   | 0,199   | 0,162   |
| HplnvsL  | 0,197   | 0,185   | 0,188    | 0,166   | 0,192   | 0,188   | 0,156   |
| Sklnvs   | 0,208   | 0,194   | 0,194    | 0,183   | 0,195   | 0,203   | 0,171   |
| AcInvs   | 0,162   | 0,158   | 0,154    | 0,138   | 0,16    | 0,16    | 0,132   |
| ChDgo    | 0,146   | 0,145   | 0,138    | 0,148   | 0,152   | 0,175   | 0,151   |
| Oclnvs1  | 0,212   | 0,215   | 0,215    | 0,183   | 0,206   | 0,212   | 0,177   |
| Ollnvs1  | 0,219   | 0,222   | 0,224    | 0,182   | 0,205   | 0,217   | 0,174   |
| Osplnvs1 | 0,209   | 0,212   | 0,208    | 0,186   | 0,2     | 0,211   | 0,174   |
| Sclnvs1  | 0,206   | 0,198   | 0,198    | 0,188   | 0,201   | 0,215   | 0,178   |
| Aqlnvs1  | 0,197   | 0,189   | 0,195    | 0,194   | 0,184   | 0,196   | 0,161   |
| Emlnvs1  | 0,188   | 0,2     | 0,218    | 0,199   | 0,205   | 0,197   | 0,162   |
| Avlnvs1  | 0,175   | 0,173   | 0,172    | 0,16    | 0,17    | 0,159   | 0,152   |
| Omlnvs1  | 0,177   | 0,175   | 0,185    | 0,165   | 0,166   | 0,153   | 0,15    |
| Oclnvs2  | ID      | 0,656   | 0,561    | 0,228   | 0,253   | 0,237   | 0,223   |
| Ollnvs2  | 0,656   | ID      | 0,653    | 0,211   | 0,263   | 0,224   | 0,214   |
| Osplnvs2 | 0,561   | 0,653   | ID       | 0,216   | 0,236   | 0,206   | 0,203   |
| Sclnvs2  | 0,228   | 0,211   | 0,216    | ID      | 0,232   | 0,242   | 0,183   |
| Aqlnvs2  | 0,253   | 0,263   | 0,236    | 0,232   | ID      | 0,316   | 0,254   |
| Emlnvs2  | 0,237   | 0,224   | 0,206    | 0,242   | 0,316   | ID      | 0,23    |
| Avlnvs2  | 0,223   | 0,214   | 0,203    | 0,183   | 0,254   | 0,23    | ID      |
| Omlnvs2  | 0,243   | 0,244   | 0,225    | 0,203   | 0,254   | 0,248   | 0,559   |
| SrlnL    | 0,196   | 0,2     | 0,184    | 0,178   | 0,191   | 0,201   | 0,179   |



| Seq->     | OmInvs2 | SrInL |
|-----------|---------|-------|
| MmInvs    | 0,157   | 0,196 |
| DrInvs    | 0,168   | 0,196 |
| HplInvsL  | 0,166   | 0,21  |
| SkInvs    | 0,185   | 0,222 |
| AcInvs    | 0,143   | 0,177 |
| ChDgo     | 0,154   | 0,187 |
| OclInvs1  | 0,185   | 0,22  |
| OllInvs1  | 0,187   | 0,226 |
| OsplInvs1 | 0,183   | 0,221 |
| ScInvs1   | 0,202   | 0,225 |
| AqlInvs1  | 0,178   | 0,202 |
| EmInvs1   | 0,191   | 0,227 |
| AvInvs1   | 0,167   | 0,168 |
| OmInvs1   | 0,166   | 0,169 |
| OclInvs2  | 0,243   | 0,196 |
| OllInvs2  | 0,244   | 0,2   |
| OsplInvs2 | 0,225   | 0,184 |
| ScInvs2   | 0,203   | 0,178 |
| AqlInvs2  | 0,254   | 0,191 |
| EmInvs2   | 0,248   | 0,201 |
| AvInvs2   | 0,559   | 0,179 |
| OmInvs2   | ID      | 0,182 |
| SrInL     | 0,182   | ID    |

Abbreviations. Vertebrate: Dr, *Danio rerio* and Mm, *Mus musculus*. Hexapoda: Dm, *Drosophila melanogaster*. Mollusca: Ac, *Aplysia californica* and Cg, *Crassostrea gigantea*. Ambulacraria: Hp, *Hemicentrotus pulcherrimus*; Sk and *Saccoglossus kowalevskii*. Cnidaria: Ch, *Clytia hemisphaerica*. Porifera: Aq, *Amphimedon queenslandica*; Av, *Aphrocalistes vastus*; Em, *Ephydatia muelleri*; Oc, *Oscarella carmela*; Ol, *Oscarella lobularis*; Om, *Oopsacas minuta*; Osp, *Oscarella sp.*; Sc, *Sycon ciliatum*. Choanoflagellata: Sr, *Salpingoeca rosetta*.

**Table S2.4: PET family sequence identity matrix.** Obtained using bioedit software.

| Seq->     | MmPkL1 | MmPkL2 | MmPkL3 | DmPk  | DmEsn | ChPk  | TaPk  |
|-----------|--------|--------|--------|-------|-------|-------|-------|
| MmPkL1    | ID     | 0,484  | 0,292  | 0,198 | 0,249 | 0,24  | 0,215 |
| MmPkL2    | 0,484  | ID     | 0,323  | 0,193 | 0,247 | 0,225 | 0,19  |
| MmPkL3    | 0,292  | 0,323  | ID     | 0,174 | 0,259 | 0,255 | 0,269 |
| DmPk      | 0,198  | 0,193  | 0,174  | ID    | 0,303 | 0,162 | 0,127 |
| DmEsn     | 0,249  | 0,247  | 0,259  | 0,303 | ID    | 0,226 | 0,211 |
| ChPk      | 0,24   | 0,225  | 0,255  | 0,162 | 0,226 | ID    | 0,215 |
| TaPk      | 0,215  | 0,19   | 0,269  | 0,127 | 0,211 | 0,215 | ID    |
| MmTes     | 0,117  | 0,115  | 0,188  | 0,081 | 0,13  | 0,144 | 0,169 |
| DmTes     | 0,078  | 0,075  | 0,118  | 0,06  | 0,082 | 0,099 | 0,103 |
| ChTes     | 0,136  | 0,129  | 0,196  | 0,086 | 0,139 | 0,152 | 0,185 |
| OcPkTesL  | 0,138  | 0,141  | 0,237  | 0,098 | 0,161 | 0,178 | 0,204 |
| OIPkTesL  | 0,147  | 0,148  | 0,246  | 0,104 | 0,172 | 0,187 | 0,207 |
| OspPkTesL | 0,153  | 0,151  | 0,247  | 0,104 | 0,172 | 0,19  | 0,202 |
| ScPkTesL  | 0,126  | 0,126  | 0,199  | 0,092 | 0,143 | 0,156 | 0,183 |
| AqPkTesL  | 0,13   | 0,13   | 0,198  | 0,093 | 0,138 | 0,159 | 0,167 |
| EmPkTesL  | 0,133  | 0,13   | 0,212  | 0,09  | 0,139 | 0,163 | 0,171 |
| AvPkTesL  | 0,128  | 0,127  | 0,21   | 0,092 | 0,148 | 0,16  | 0,193 |
| OmPkTesL  | 0,129  | 0,127  | 0,209  | 0,1   | 0,15  | 0,16  | 0,189 |
| MIPkTesL  | 0,142  | 0,14   | 0,196  | 0,092 | 0,151 | 0,156 | 0,162 |
| SrPkTesL  | 0,083  | 0,079  | 0,124  | 0,064 | 0,092 | 0,097 | 0,109 |

| Seq->     | MmTes | DmTes | ChTes | OcPkTesL | OIPkTesL | OspPkTesL | ScPkTesL |
|-----------|-------|-------|-------|----------|----------|-----------|----------|
| MmPkL1    | 0,117 | 0,078 | 0,136 | 0,138    | 0,147    | 0,153     | 0,126    |
| MmPkL2    | 0,115 | 0,075 | 0,129 | 0,141    | 0,148    | 0,151     | 0,126    |
| MmPkL3    | 0,188 | 0,118 | 0,196 | 0,237    | 0,246    | 0,247     | 0,199    |
| DmPk      | 0,081 | 0,06  | 0,086 | 0,098    | 0,104    | 0,104     | 0,092    |
| DmEsn     | 0,13  | 0,082 | 0,139 | 0,161    | 0,172    | 0,172     | 0,143    |
| ChPk      | 0,144 | 0,099 | 0,152 | 0,178    | 0,187    | 0,19      | 0,156    |
| TaPk      | 0,169 | 0,103 | 0,185 | 0,204    | 0,207    | 0,202     | 0,183    |
| MmTes     | ID    | 0,173 | 0,345 | 0,337    | 0,329    | 0,335     | 0,25     |
| DmTes     | 0,173 | ID    | 0,167 | 0,165    | 0,171    | 0,169     | 0,142    |
| ChTes     | 0,345 | 0,167 | ID    | 0,38     | 0,396    | 0,41      | 0,301    |
| OcPkTesL  | 0,337 | 0,165 | 0,38  | ID       | 0,763    | 0,787     | 0,392    |
| OIPkTesL  | 0,329 | 0,171 | 0,396 | 0,763    | ID       | 0,835     | 0,377    |
| OspPkTesL | 0,335 | 0,169 | 0,41  | 0,787    | 0,835    | ID        | 0,38     |
| ScPkTesL  | 0,25  | 0,142 | 0,301 | 0,392    | 0,377    | 0,38      | ID       |
| AqPkTesL  | 0,282 | 0,134 | 0,301 | 0,382    | 0,391    | 0,387     | 0,322    |
| EmPkTesL  | 0,289 | 0,146 | 0,344 | 0,427    | 0,428    | 0,438     | 0,332    |
| AvPkTesL  | 0,255 | 0,141 | 0,314 | 0,399    | 0,419    | 0,424     | 0,307    |
| OmPkTesL  | 0,244 | 0,149 | 0,319 | 0,406    | 0,419    | 0,413     | 0,302    |
| MIPkTesL  | 0,243 | 0,109 | 0,247 | 0,3      | 0,297    | 0,304     | 0,257    |
| SrPkTesL  | 0,15  | 0,111 | 0,154 | 0,19     | 0,182    | 0,183     | 0,205    |

| Seq->     | AqPkTesL | EmPkTesL | AvPkTesL | OmPkTesL | MIPkTesL | SrPkTesL |
|-----------|----------|----------|----------|----------|----------|----------|
| MmPkL1    | 0,13     | 0,133    | 0,128    | 0,129    | 0,142    | 0,083    |
| MmPkL2    | 0,13     | 0,13     | 0,127    | 0,127    | 0,14     | 0,079    |
| MmPkL3    | 0,198    | 0,212    | 0,21     | 0,209    | 0,196    | 0,124    |
| DmPk      | 0,093    | 0,09     | 0,092    | 0,1      | 0,092    | 0,064    |
| DmEsn     | 0,138    | 0,139    | 0,148    | 0,15     | 0,151    | 0,092    |
| ChPk      | 0,159    | 0,163    | 0,16     | 0,16     | 0,156    | 0,097    |
| TaPk      | 0,167    | 0,171    | 0,193    | 0,189    | 0,162    | 0,109    |
| MmTes     | 0,282    | 0,289    | 0,255    | 0,244    | 0,243    | 0,15     |
| DmTes     | 0,134    | 0,146    | 0,141    | 0,149    | 0,109    | 0,111    |
| ChTes     | 0,301    | 0,344    | 0,314    | 0,319    | 0,247    | 0,154    |
| OcPkTesL  | 0,382    | 0,427    | 0,399    | 0,406    | 0,3      | 0,19     |
| OIPkTesL  | 0,391    | 0,428    | 0,419    | 0,419    | 0,297    | 0,182    |
| OspPkTesL | 0,387    | 0,438    | 0,424    | 0,413    | 0,304    | 0,183    |
| ScPkTesL  | 0,322    | 0,332    | 0,307    | 0,302    | 0,257    | 0,205    |
| AqPkTesL  | ID       | 0,465    | 0,327    | 0,337    | 0,243    | 0,165    |
| EmPkTesL  | 0,465    | ID       | 0,376    | 0,377    | 0,277    | 0,175    |
| AvPkTesL  | 0,327    | 0,376    | ID       | 0,665    | 0,251    | 0,173    |
| OmPkTesL  | 0,337    | 0,377    | 0,665    | ID       | 0,254    | 0,171    |
| MIPkTesL  | 0,243    | 0,277    | 0,251    | 0,254    | ID       | 0,142    |
| SrPkTesL  | 0,165    | 0,175    | 0,173    | 0,171    | 0,142    | ID       |

Abbreviations. Vertebrate: Mm, *Mus musculus*. Hexapoda: Dm, *Drosophila melanogaster*. Cnidaria: Ch, *Clytia hemisphaerica*. Placozoa: Ta, *Trichoplax adhaerens*. Porifera: Aq, *Amphimedon queenslandica*; Av, *Aphrocalistes vastus*; Em, *Ephydatia muelleri*; Oc, *Oscarella carmela*; Ol, *Oscarella lobularis*; Om, *Oopsacas minuta*; Osp, *Oscarella sp.*; Sc, *Sycon ciliatum*. Ctenophora: Ml, *Mnemiopsis leidyi*. Choanoflagellata: Sr, *Salpingoeca rosetta*.

**Table S2.6: Strabismus/Van Gogh/Stan sequence identity matrix.** Obtained using bioedit software.

| Seq->    | MmVangL1 | DrVangL1 | MmVangL2 | DrVangL2 | DmVang | ChStbm | TaVang |
|----------|----------|----------|----------|----------|--------|--------|--------|
| MmVangL1 | ID       | 0,648    | 0,708    | 0,644    | 0,422  | 0,366  | 0,321  |
| DrVangL1 | 0,648    | ID       | 0,628    | 0,608    | 0,397  | 0,365  | 0,305  |
| MmVangL2 | 0,708    | 0,628    | ID       | 0,768    | 0,414  | 0,373  | 0,309  |
| DrVangL2 | 0,644    | 0,608    | 0,768    | ID       | 0,413  | 0,363  | 0,31   |
| DmVang   | 0,422    | 0,397    | 0,414    | 0,413    | ID     | 0,287  | 0,267  |
| ChStbm   | 0,366    | 0,365    | 0,373    | 0,363    | 0,287  | ID     | 0,332  |
| TaVang   | 0,321    | 0,305    | 0,309    | 0,31     | 0,267  | 0,332  | ID     |
| OcVang   | 0,272    | 0,271    | 0,252    | 0,259    | 0,251  | 0,277  | 0,294  |
| OIVang   | 0,27     | 0,276    | 0,253    | 0,255    | 0,245  | 0,274  | 0,286  |
| OspVang  | 0,244    | 0,251    | 0,23     | 0,228    | 0,219  | 0,238  | 0,212  |

| Seq->    | OcVang | OIVang | OspVang |
|----------|--------|--------|---------|
| MmVangL1 | 0,272  | 0,27   | 0,244   |
| DrVangL1 | 0,271  | 0,276  | 0,251   |
| MmVangL2 | 0,252  | 0,253  | 0,23    |
| DrVangL2 | 0,259  | 0,255  | 0,228   |
| DmVang   | 0,251  | 0,245  | 0,219   |
| ChStbm   | 0,277  | 0,274  | 0,238   |
| TaVang   | 0,294  | 0,286  | 0,212   |
| OcVang   | ID     | 0,75   | 0,564   |
| OIVang   | 0,75   | ID     | 0,605   |
| OspVang  | 0,564  | 0,605  | ID      |

Abbreviations. Vertebrate: Dr, *Danio rerio* and Mm, *Mus musculus*. Hexapoda: Dm, *Drosophila melanogaster*. Cnidaria: Ch, *Clytia hemisphaerica*. Placozoa: Ta, *Trichoplax adhaerens*. Porifera: Oc, *Oscarella carmela*; OI, *Oscarella lobularis*; Om, *Oopsacas minuta*; Osp, *Oscarella sp.*

**Figure S2.1: Flamingo/Celsr/Stan alignment.** Threshold for shading has been fixed at 80% for both identity (black) and similarity (grey).

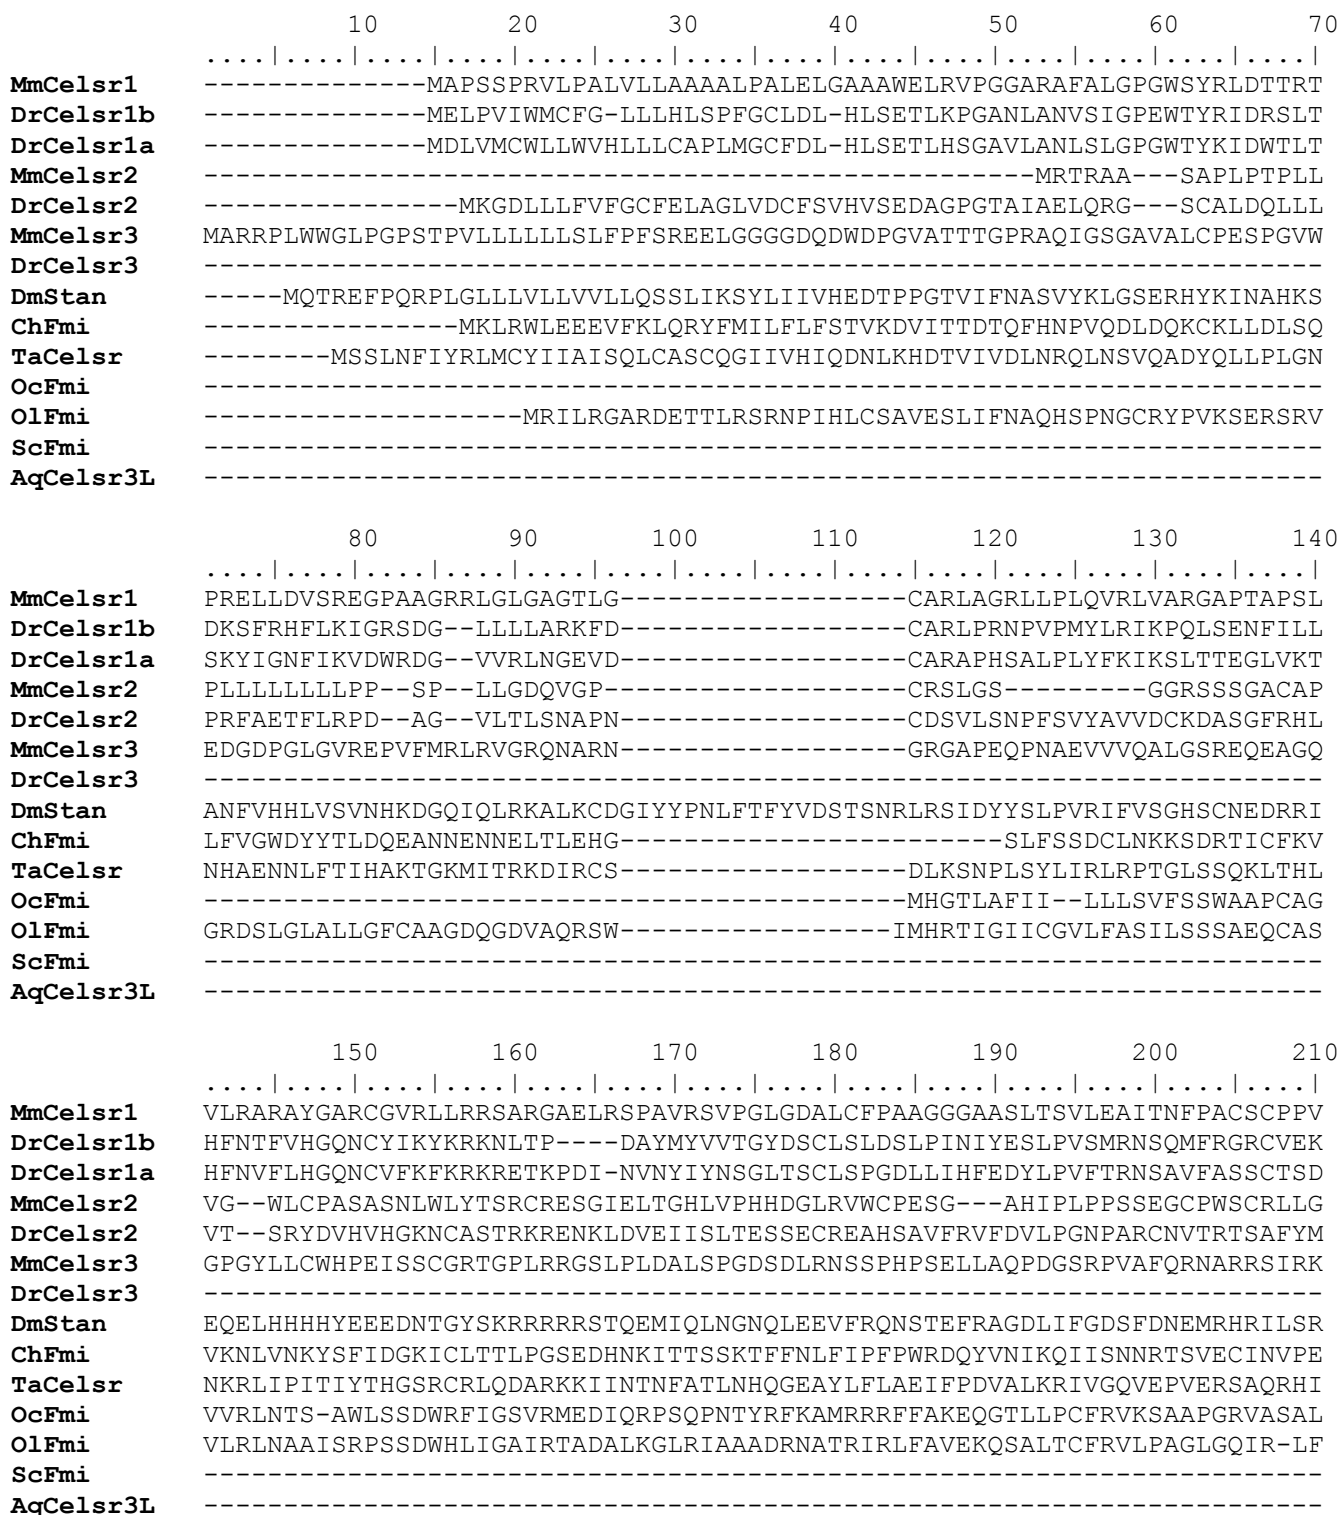

```

                220      230      240      250      260      270      280
      . . . . | . . . . | . . . . | . . . . | . . . . | . . . . | . . . . | . . . . |
MmCelsr1 AGTGCRRGPICLRPGGSAELRLVLCALGRAAGAVVVELVIEATSGTPSESPSVSPSLLNLSQPRAGVVRRS
DrCelsr1b TQ----RRVSPLTN-----RCLPHNQ-RDEANLICLMPNSVNS-SLYVDVKLHLNRKYTGSDFDPWAKRQ
DrCelsr1a QLNVFVRNGTLLVKDA---YCLETNLGRFKSTIRCSFLDSKGE-PFSVCLKLRFTSDQTSLSYVTNPRKQ
MmCelsr2 IGGHLSPOGTLTLPEEHP--CLKAPRLRCQSCKLAQAPGLRAGEG-----SPEESLGGRR
DrCelsr2 SDGSLFTSARLCFTRDS----LLEFQMRCCGRAGAAHAHWVGRGPFTQTHLSKVLRLAARSNSGLLSRR
MmCelsr3 RVETSRCCKGLWEPGHKGQGERSATSTVDRGPFRRDCLPGSLGSGLGEDSAPRAVRTAPTGPSAPRESRT
DrCelsr3 -----
DmStan KRRAVGSPDPLHLQPALHRRISDAKQWISETYASYAIHTTDKWNQICLRRSQFINSLNAFLPRVCQHCK
ChFmi NTVRLQKDGTLYINKNVLHEPIKSIKCYLKRNGSNSKFKLI IQFENDFEVLVR-----
TaCelsr VLTPI SKRIVKIYCKALTDPSKTASLCSRPFHLQVVTRYQRSNLNVNFAKIHLMTDYQINTNHDRQNQKVI
OcFmi RKQSLLYVESRCNSTAV----TAEDNTRRFTLRMVEI STGRRRETCDVDDVVT FESVGRPRTYGGGRPL
OlFmi GTESLLYVETRCSN-----QTAKRREFELRVAATGRTGRR-QACVRVDVDYTHSAVSHYDAR-AIS
ScFmi -----MAGVERIWFVSVLVVVLFTFSPR-----
AqCelsr3L -----

```

```

                290      300      310      320      330      340      350
      . . . . | . . . . | . . . . | . . . . | . . . . | . . . . | . . . . | . . . . |
MmCelsr1 RR-----
DrCelsr1b -----
DrCelsr1a RI-----
MmCelsr2 -----
DrCelsr2 -----
MmCelsr3 APGRMRSRGLFRRRFLFERPGPRPPGFPTGPEAKQILST-----N
DrCelsr3 -----
DmStan VSFLDVNDERFAIEHQSRDLVASRDVCI AESMWKVSITFNIRCDRRDIVDS DHRLKIVYHHQEFNDTDIA
ChFmi -----
TaCelsr NHHQRHQLVEWYNRLPSKNNPILEHHRN-----R
OcFmi RR-----
OlFmi RL-----
ScFmi -----
AqCelsr3L -----

```

```

                360      370      380      390      400      410      420
      . . . . | . . . . | . . . . | . . . . | . . . . | . . . . | . . . . | . . . . |
MmCelsr1 ----GTGSSTSPQEFPLPSYQVSVPE NEPAGTAVIELRAHDP--DEGDAGRLSYQMEALFDRSNGYFLID
DrCelsr1b ----KRVNSAPQEQQLPNYQVSVPE NEPSGTRVITLKAFDA--DDGDAGVVVYDMEALFDSRSNNLFQIN
DrCelsr1a ----KRAANSVPQEQQLSNYQVSVPE NEPAGTRVITLKA TVS--DPGETGKIEY GMEALFDSRSNDFFRID
MmCelsr2 ----KRVNNTAPQEQPPSYQATVPE NQPAGTSVASLRAIDP--DEGEAGRLEY TMDALFDSRSNHFFSLD
DrCelsr2 ----RRVNNNPQFHPPMYQVSVPE NQPAGTFVVVLKAVDP--DEGEAGRLEY VLEALFDSRSNNLFAVD
MmCelsr3 QARPRRAANRHPQFPQYNYQTLVPE NEAAGTSVLRVVAQDP--DPGEAGRLEY SLAALMNSRSLELFSID
DrCelsr3 -----
DmStan RRVRRELNRNQSPYFEQALYVASVLEEQPAGAAVTTVRARDP--EDS---PVVYSMVSLLD SRSQSLEFKVD
ChFmi ----RRRNIPYFEKSLYSVDIFEDTKRDSVIRKLVNGG-----SGKYSFSKTEDPKTDIIFKVK
TaCelsr RSIRSKRDVIAPVETQSSYSSSIFENEPSGTTVLT VSVRD----KSAPGLTY SMAAVGDLRSNSLFGIN
OcFmi ---RAVNQNAPKETKTTYNFVAVSENQSPGMFVGEI SANDP--DAGDAGVVVY SMKFLNDVRTEGKFEID
OlFmi ---KRAVNRNAPKETKQSYDFQVTENLNAGTFVGVKVSADDA--DTGSAGAVVY SMRFLHDANTAGKFEID
ScFmi -----PVSCENRFESQLTYTFTVSEDTVPKTSIGQVVLT DASGKELAVSAARYSISARGVLRVSGLFTVR
AqCelsr3L -----

```

```

          430          440          450          460          470          480          490
    . . . | . . . | . . . | . . . | . . . | . . . | . . . | . . . | . . . | . . . | . . . | . . . |
MmCelsr1  AATGAVTTARSLDRET-KDTHVLKVSADV---HGSPRRSAATYLTVTVSDTNDHSPVFEQSEYRERIREN
DrCelsr1b  PETGGITTLQPLDREV-KDTHVFKVTATD---KGI PKRSAIAYLTIITVSDTNDHSPVFEQNEYRVNVREN
DrCelsr1a  PQTGSIETAQPLDREV-KDTHVFKVTASV---AGFAKRAATSYLTIITVSDTNDHSPVFEQNEYRVRIREN
MmCelsr2  PITGVVTTAEELDRET-KSTHVFRVTAQD---HGMPRRSALATLTILVTDTNDHDPVFEQQEYKESLREN
DrCelsr2  PASGVVSTVEILDRET-KDTHVFRVTAVD---HGTPrRTAMATLTITVTVSDTNDHDPVFEQQDYKESIREN
MmCelsr3  PQSGLIRTAALDRES-MERHYLRVTAQD---HGSPRLSATTMVAVTVADRNDHAPVFEQAQYRETLREN
DrCelsr3  -----
DmStan    SRTGVVTTASLDRREL-MDVHYFRVVATD---DSFPPrSGTTTTLQVNVLDNDHSPVFEAEQFEASIREG
ChFmi     SDTGDVILLQELNREDGAERFSIDIRAID---LNDPSNSATTTIRVKVLDVNDNAPTFAESSYSITVDEG
TaCelsr   SVSGAIYTVNYLDREE-IAKHQFTVTATVN--DGTTLFsrVSVTIDVLDNDNAPRFESPSYQVSIPEd
OcFmi    ATTGKITTRVALNREK-MDKHEFEVKAVD---KGS PKFEGKASLVIRVLDENDNPNVFDRLSYTKSIYEN
OlFmi    ASNGEIRTKVPLDREK-MNRHEFELTARD---NGSPQLEGKASLVIRVLDANDNSPVFDDASYSETIRED
ScFmi    -EDGHVVIAAALDRES-LEQHEYSLVGKYITRAHNWQRADCTIVVNLDDVNDSPKFEENDVRTVIGILEG
AqCelsr3L -----MLAGERIGMLIYIDTYTLIGQEILQLSVVDNT

```

```

          500          510          520          530          540          550          560
    . . . | . . . | . . . | . . . | . . . | . . . | . . . | . . . | . . . | . . . | . . . | . . . |
MmCelsr1  LEVGYEVLTI RATDGDAPSNANMRYRLLEG--AG-----GVFEIDARSVVVRTRAVVDREEA AEYQL
DrCelsr1b  VEVGFVEVMTIRATDGDAPSNANMIYKIVNDDEVN-----SCFEIDPRNGLVTRKVRPDREVKVSKYKL
DrCelsr1a  VEVGFVEVITVRATDGDAPSNANMIYRIMNEEGVN-----SCFEIDSWNGLVKIKVRPDRETM AQYQL
MmCelsr2  LEVGYEVLTVRATDGDAPPNANILYRLLLEGAGDSPS-----DAFEIDPRSGVIRTRGPVDREEVESYKL
DrCelsr2  LEIGYEVLTVRATDGDAPINGNILYHLLNSNGTN-----DVEIDSRSGVIRTRGLVDRETVDSYML
MmCelsr3  VEEGYPILQLRATDGDAPPNANLRYRFVGVSPAVRTAAA-----AAFEIDPRSGLISTSGRVDREHMESYEL
DrCelsr3  -----
DmStan    ATVGSTVITLRATDQDIGKNAEIEYGI EAVTDGAGLAQDQEMPIFRIDSRSGVISTRSSLDRETSDSYHL
ChFmi     QVANKYILTVRATDADEGSNQEIRYSIVNKANVQVP-----FQIDPISGAIKSTDVLDRETHPYYNF
TaCelsr   IPIGTTALQVRAQDNDASSNARVTYSIVNSAGIN-----SAFRVGVTSGAIIDRSLDREITDRYHL
OcFmi    VAVGHQAEVHATDIDFGVNGSLVYSLSTGNINGA-----FTIVSSSQIKTAKSLDREITVPRYVL
OlFmi    VDVGHQAGEVHATDLDTGSNADVIYSLVG--NTDDA-----FVVTSTTGRILTTKSLDREITIAVYSF
ScFmi    EQVDRAVADMVSDADLGTNGDISFAILQASVPN-----TFYMSSEGLVLTSAALDREITIAQYNI
AqCelsr3L SHVLYEILSTQSSDDDFYLSP-----NGFLYTARMLNKSQTPLYNL

```

```

          570          580          590          600          610          620          630
    . . . | . . . | . . . | . . . | . . . | . . . | . . . | . . . | . . . | . . . | . . . | . . . |
MmCelsr1  LVEANDQGRNPGPL-SASATVHIVVEDENDNYPOFSEKRYVVQVPEd---VAVNTAVLRVQATDRDQGN
DrCelsr1b  FVEANDQGREPGPR-TATATVHIFIEDENDNYPOFSEKRYVVQVSEn---IAVNTQVAVVKATDKDAGNN
DrCelsr1a  IVEASDQGKEPGPR-SATATVHITVEDENDNYPOFSEKRYVVQVPEn---VAVNTKVAQVEATDRDEGNN
MmCelsr2  TVEASDQGRDPGPR-SSTAIVFLSVEDDNDNAPQFSEKRYVVQVREd---VTPGAPVLRVTASDRDKGSN
DrCelsr2  MVEANDQGRDPGPR-SATATVHIVVEDDNDNAPQFSEKRYIVQVPEd---LTPNTEILQVTATDQDRGNN
MmCelsr3  VVEASDQGQEPGPR-SATVRVHITVLDENDNAPQFSEKRYVAQVREd---VRPHTVVLRVTATDKDKDAN
DrCelsr3  -----
DmStan    LVTAADLASAQSERRTATASVQVKVLDNDNDNYPOFSERTYTVQVPEdQWGGTEDNTVAHIRATDADQGN
ChFmi     TVRAEDQGVKLHT---DVSVSITLRDKNDNSPKFSKDVYKLSIPEN---TTVGSVVFKLDVDDDIGON
TaCelsr   EIQTADSGTTPKFA---RSNVTIIVTDVNDNPPQFTQKNYKVTIAED---AKINTLVTTVRATDPDNDN
OcFmi    TAVATDEG--PQPR-SATVPVTIILNDVNDSPPKETKLTQENVDED---IAVSRTVVTVTANSDDLGN
OlFmi    RAVATDRAGASGAL-SASVPVTITLSVNDSPPREDKSTYHEDVDED---VGVPRITVVEAKSDDLGDN
ScFmi    TIRATDHGTPALHS---DLLLIVDVLDINDHAPPEFNQTTYNASVHEd---IASGTAILQIFATDLDTGTN
AqCelsr3L AVSARNTQPLSTPS-----YTFVTVVITNDSVSESEILVPLHGN---ESVGQNLTYVEATRADS--Y

```

```

        640      650      660      670      680      690      700
    ....|....|....|....|....|....|....|....|....|....|....|....|....|....|
MmCelsr1  AAIHYSIVSGNLLKGFYLLHSLSGSLDVINPLDFAIREYTLRIKAQDGRPPLINSSGLVSVQVLDVNDN
DrCelsr1b AKVHYSIINGNIKGFYIHSPTGVIDVVSPLDYEMIREYTLRVKAQDGRPPLINGTGMVVIQVVDVNDN
DrCelsr1a ARVHYSIISGNVKGQFFIHTPTGAIDVINPLDYETIREYNLRIKAQDGRPPLINGTGVVVVQVVDVNDN
MmCelsr2  ALVHYSIMSGNARGQFYLDAAQTGALDVVSPLDYETTKEYTLRIRAQDGRPPLSNVSGLVTVQVLDINDI
DrCelsr2  AVVHFSIMSGNTRGQFYIDAQTGKLDLVSQLDYEMNKEYTLRIRAQDGRPPLSNISGLVTVQVLDINDN
MmCelsr3  GLVHNYNIISGNSRGHFAIDSLTGEIQVMAPLDFAEREYALRIRAQDAGRPPPLSNNTGLASIQVVDINDH
DrCelsr3  -----
DmStan    AAIRYAIIGGNTQSQFSIDSMSGDVSLVKPLDYESVRSYRLVIRAQDGGSPSRSN-TTQLLVNVIDANDN
ChFmi     GVIEFRPLDSNLR--FRINTSTGELIILKEAVDFDKYQRFSRFTVVAFDKGSPPKYANTEVEITIEDVNDN
TaCelsr   ADIRYSLAGQN---KETINPTNGRITLIASLDYEQQQSYTLDVTAKDRGRPSLSN-TTTVVVSVTDVNDN
OcFmi     GRVVYSITAGNDDGTFEGIGHVSGSIYVAKSLDYESHTLYTLTIKAQDGG-TVPLSATASVDIQVNVNDN
OlFmi     ARIFYNIDSGNDDGTFEGIQTTGKIFVAKPLDYETTSFYSLTVKARDGG-TVPLSAFATVEIQINNVNDN
ScFmi     SKLAYRFASGNYDDALKIDPQTMITVAKSLDYDTLQDGDAYQVQVQAVDGGGLSAMATVIIVTMNANDH
AqCelsr3L PFQYTIIGGSNAFQFFTLNSMSGQLSLSSSTVNYFGFLDQYRIVVEGRSLSDPLVFGNVVVIIFSLSPKNS

```

```

        710      720      730      740      750      760      770
    ....|....|....|....|....|....|....|....|....|....|....|....|....|....|
MmCelsr1  -APIFVSSPFQAA----VLENVPLGHSVLHIQAVDADAGENARLQYRLVDTASTIVGGSSVDSENPASAP
DrCelsr1b -APMEVSTPFQAS----VLENVPIGYSVIHIQAIDADSGDNAHLEYKLTDTSE-----P
DrCelsr1a -APMEVSTPFQAT----VLENVPIGYSVIHIQAIDSDSGENARLDYSLTDTT-----P
MmCelsr2  RPPIFVSTPFQAT----VLESVPLGLVVLHVQAIDADAGDNARLEYSLAGVG-----H
DrCelsr2  -APIFVSTPFQAT----VLENVVPGYSVIHIQAVDADAGDNSRLEYRLTETT-----A
MmCelsr3  -APIFVSTPFQVS----VLENAPLGHSVIHIQAVDADHGENSRLEYSLTGVA-----S
DrCelsr3  -----
DmStan    -APRFYTSQFQES----VLENVVPGYNIIRVQAYDSDEGANAEITYSISERD-----D
ChFmi     -APRFKAKRIFERTSD--IMEDIKVGSFVYKLSARDRDSGPNGDITFKLEDGLP-----Q
TaCelsr   -QPRFSSNVYQAS----VKEDI PVGSSVLPVHAFDADSDQNKQVRYSIQRGS-----E
OcFmi     -APHFEHDPYRKS----IREGDTFQKSFLLTVLAVDDDKGTLDGVTYRISAPA-----DI
OlFmi     -APRFKKPRYRET----VRENDTPKNGFATVSAVDDDKGVLGDVTYRIDASS-----DV
ScFmi     -SPVFDQDGYTFF----VTEFDTPLAPVGKVVYATDLDRGLFGSVVYDLPNVR-----D
AqCelsr3L -TGGFTKKEYLFTVSNETAIGEVEFGYVYLSVCNISSDSMNSSPLAVNYSITN-----

```

```

        780      790      800      810      820      830      840
    ....|....|....|....|....|....|....|....|....|....|....|....|....|....|
MmCelsr1  DFPFQIHNSSGWITVCAELDREEEVEHYSFGVEAVDHCSPAMSSSASVSITVLDVNDNDPMTQPVYELRL
DrCelsr1b GFPPFVINNSTGWVTVSAELDRETTTEFYFSGVEARDHGVPTMSSSASVSVTILDVNDNVPTFTQHLYNLKV
DrCelsr1a GFPPFSINNSTGWITVSDDELDRSTEFYTFGVEARDNGVPMSSSASVSVTILDVNDNIPFTTEKMYSLKI
MmCelsr2  DFPFTINNGTGWISVAAELDREEVDFYFSGVEARDHCTPALTASASVSVTILDVNDNNPFTTQPEYTVRL
DrCelsr2  NFPFTINNSTGWIVVAAELDRETVDFYFNGVEARDHCAPAMSSSASISMTILDVNDNNPFTTQKAYMRL
MmCelsr3  DTPFVINSATGWVSVSGPLDRESVEHYFFGVEARDHCSPPLSASASVTVTVLDVNDNRPEFTMKEYHLRL
DrCelsr3  -----
DmStan    NFPLAVDPRTGWVQTIKPLDREEQGRFAFQVVAKDGCVPPKSASSSVVITVQDVNDNDPAFNPKYVEANV
ChFmi     DFPFELDPKSGEITVSKGLDYETTKSYKFGVIAVDNCHPCKDITQVFNIGNVNDNPKFKQSSYYKEI
TaCelsr   EIPFNVDSVSGVISTARPLNYESKSYQSFLLIATDGGTPPLSSAQVTVTVVDVNDNAPKFKPKSIYNADV
OcFmi     QAKFSIGSTSCNIDIVTHLDFESKSSYQFTVIAEDGGQSPASGQTTIRVGVTDVNDDEVQFTKTLYTEKI
OlFmi     EKKFDIGRTSGDIDI IAHLDYEDKTSYQFNVAEDGCGNPPSTGQTTVTVNVVDVNDDEVQFTKTLYAEKI
ScFmi     HAYFQRTSSDGILRAAAPLDHELPRRHTMTVRALDKCSPPRALTNTVTIIVNDINDVVPFQQRSYEASI
AqCelsr3L SDDVQINPVTGGLSFVSLPRNGSITNLTVIAVTRSGSSFSASVTVELEPTRYVMEIEKRSYMYVVYIDDG

```



```

      850      860      870      880      890      900      910
      . . . | . . . | . . . | . . . | . . . | . . . | . . . | . . . | . . . | . . . | . . . |
MmCelsr1  NEDAAVGSSVLTLRARDRDA--NSVITYQLTGNTNRNRFALSSQSGGLITLALPLDYKQERQYVLAVTA
DrCelsr1b  NEDAVVGTSVLTVSAVDRDV--NSVVTYQISSGNTRNRFALSSQSGGLITLALPLDYKQERQYLLTITA
DrCelsr1a  NEDAVVGTSVLTVTALDRDV--NSVVTYQISSGNTRNRFALSSQSGGLITLALPLDYKQERQYVLTITA
MmCelsr2  NEDAAVGTSVVTVSAVDRHA--HSVITYQITSGNTRNRFALSSQSGGLVSLALPLDYKLERQYVLAVTA
DrCelsr2  NEDAAVGTSVVTVSAVDQDI--NSVVTYQISSGNTRNRFALSSQSGGLITLALPLDYKLERQYVLTVTA
MmCelsr3  NEDAAVGTSVVSVTAVDRDA--NSAISYQITGNTNRNRFALSTQGGVGLVTLALPLDYKQERYFKLVTA
DrCelsr3  -----
DmStan    GEDQPPGTPVTTVTATDPDE--DSRLHYEITTCNTRGRFALTSQNGRGLITIAQSLDYKQEKRFLLTVAA
ChFmi     LEDTRRGEAIEKVEAFDPDQLSNEDFEYATEEGNSDDCFGIDP--FQGVLFKCDLDYKRKNMYNLKLRV
TaCelsr   REDEKVGRIQVVTATDVDS---KTIYYSIVSGNVRSRFGIDPQ---GYIYLAAPIIDYLRKEYTLVVQA
OcFmi     SEAASKRTPVLQVSAANDKDLPSNGQLLYKIGATTVGNPFRINS--LDGIIIEVAAALDRERKDVYVFFVVEA
OlFmi     SELAGRTPVVKVSANDADLPLNGYLGYOIGFPIGNPFEDS--GSGIVSVAALDRKVDVYVFFVVEA
ScFmi     SEDTARNRLVTTVEAVDVG---LPLRYVTASGNIGSVFSINSADGSIRVAKSLDADRPGGDQYNLVVTA
AqCelsr3L PTD-GRSTVLTRIDGGGCNN-----YTILAGDCYGLFSIDPVSIGNLTIHPSP----LSPSAYSLVGVG

```

```

      920      930      940      950      960      970      980
      . . . | . . . | . . . | . . . | . . . | . . . | . . . | . . . | . . . | . . . |
MmCelsr1  SDG-TRSHTAQVFINVTDANTHRPVEQSSHYTVSVSEDRPVGTSIATISATDEDTGENARITYVLEDP--
DrCelsr1b  SDG-TRHDTTQVFINVTDANTHRPVEQSANYSQVLVSEDRPVGSTVVVISATDEDTGENARITYVMEDN--
DrCelsr1a  SDG-TRFDTAQVFINVTDANTHRPVEQANANYHQTFSEDDQPIGSTVVVISATDEDTGENARITYIMEDN--
MmCelsr2  SDG-TRQDTAQIVNVTDANTHRPVEQSSHYTVNGNEDRPAGTTVVVISATDEDTGENARITYFMEDS--
DrCelsr2  SDG-TRFDTAKVYVNVTDANTHRPVEQSSHYTVNINEDRPVGTTVVVISATDEDTGENARITYIMDDS--
MmCelsr3  SDR-ALHDHCYVHINITDANTHRPVEQSAHYSVSMNEDRPVGSTVVVISASDDEVGENARITYLLEDN--
DrCelsr3  -----
DmStan    TDSGGRSDTATVHINITDANNFAPIFENAPYSASVFEEDAPVGTTVLVVSATDSDVGVNAQITYSLNEESI
ChFmi     TDADKKPGYAYFKIEVTDANNNSPRFGQDVYQWNVLENADIGTVIKSVLATDADTGENARITYSLQPGS-
TaCelsr   SDL-LLNSTATVKMRVIDTNNHAPTDFDR-AYTADIYEDTAIGTVLLVTAKDADANENARITYRIVTP--
OcFmi     TDG-ELTNTTQVKVTIEDENDSSPTEKGMPIIASIENRPFNTTVYTVSAEDADIGNGAITFSIQQT--
OlFmi     TDG-ELTNTTQVRVTITDENDSSPVELDTPYTTSLDENVDAGTLVYTVSADADIGRNGNVTYSLQQT--
ScFmi     HDG-QHASNVNVTAVQDINDNSPSEQPTYEAKVREGDRVGTPLVTVTARDLDSADNGRVTYSLQST--
AqCelsr3L YCG-KFLSYISVEVRVLDVNN-PPVEDQRIYKVTARSSTPRNTRLLTLTYSDDLDPGSSNGTTHLSSTS-

```

```

      990      1000      1010      1020      1030      1040      1050
      . . . | . . . | . . . | . . . | . . . | . . . | . . . | . . . | . . . | . . . |
MmCelsr1  -----VPQFRIDPDTGTIYTMTELDYED----QAAYTLAITAQDNGIPQKSD-TTSLEILLILDANDNAPR
DrCelsr1b  -----VPQFRIDPDTGAIITQIEIDYED----QASYTLAI IARDNGIPQKSD-TTYVEI IIVLDANDNVPQ
DrCelsr1a  -----VPQFKIDPDSGAIITQMEIDYED----QASYTLAI IARDNGIPQKSD-TTYVEI I IILDANDNSPR
MmCelsr2  -----IPQFRIDGDTGAVTTQAEIDYED----QVSYTLAITARDNGIPQKSD-TTYLEILLVNDVNDNAPQ
DrCelsr2  -----IPQFNIDADSGAVTTQMEIDYED----QVSYTLAITARDNGIPQKSD-TTYLEILLVNDVNDNSPV
MmCelsr3  -----LPQFRIDADSGAITLQAPLDYED----QVYTLAITARDNGIPQKAD-TTYVEVMVNDVNDNAPQ
DrCelsr3  -----
DmStan    NGLGSPDPFSINPQTGAIVTNAPLDRET----TSGYLLTVTAKDGCNPSLSD-TTDVEIGVTDVNDNAPA
ChFmi     ----PIDTFGIVNDTGAIITTKKLDRET----TKSYTLVVKASDHGKPFKFGFATVVITVTDVNDNKPA
TaCelsr   -----VREFKIDSKSGAISIAAALDRET----RSTFSLEVRASDNGVPSLSG-RTDVISIILDSNDNAPV
OcFmi     -----SNLFSIDPKSGVVRTAAIIDFET----TEFVLLKVLATDHGTS PKQS-SAE LSVTVRDENDNKPE
OlFmi     -----INLFRIDPKSGVIRTMTVIDYET----TTYTLVRVLATDDGLSPRQT-STELSVTVLNENDNKPK
ScFmi     -----DTTLQVDPDTGQVYIAAPADCDRG--KGI IQYYTLWAHDNGVSSRND-SARLQLTITDINDNAPV
AqCelsr3L -----LPSFLRLLPNGELL LINALPSIAKPWETSSYNFSVVVSDGGSPSLSSSTAEVVIVINDIMPQSI

```

1060 1070 1080 1090 1100 1110 1120  
 ....|....|....|....|....|....|....|....|....|....|....|....|....|....|....|....|  
**MmCelsr1** FLRD--FYQGSVFE DAPPS TSVLQVSATDRD--SGPNGRLLYTFQGGDDGDGDFYIETEPTSGVIRTRQRRLDR  
**DrCelsr1b** FLRD--IYQGTVFE DAPVY TSVLQVSASDRD--SGSNGRLSYTFQGGDDGEGDFIIEPYSGIIRRTARKLDR  
**DrCelsr1a** FGRD--KYQGTVFE DAPIY TSVLQISASDRD--SGSNGRVSYTFQGGDDGEGDFMIEQYSGIIRTHRKLDR  
**MmCelsr2** FLRD--SYQGTVYEDVPPFT TSVLQILATDRD--SGLNGRVFYTFQGGDDGDGDFIIVESTSGVIRTLRRLDR  
**DrCelsr2** FQRD--RYLGSVMEDI PVFT TSVLQVSATDRD--SGLNGRVFYTFQGGEDGDGDFIIEESTSGVIRTLRRLDR  
**MmCelsr3** FVAS--HYTGLVSE DAPPFT TSVLQISATDRD--AHANGRVQYTFQNGEDGDGDFIIEIETEPTSGVIRTVRRLDR  
**DrCelsr3** -----  
**DmStan** FKSP--LYQASILE DALVGT TSVIQVAASDEPD--VGLNGRIKYLSDRDIEDGSEFVIDPTSGTIRTNKGLDR  
**ChFmi** FTKN--LYTFTIEE DAKIGAVVGH LQATDND--EGRNKEVRYQFKERK--HEYFSINAESGSIRTIKLLDR  
**TaCelsr** FSQP--SYNASIAEDVEIG TRVLQVAATDKD--EGVNQQIHFELAENENGNGTFAIDGSTGVIRTAKALDR  
**OcFmi** FMASPLYTSGSVSEEAIFGL TLVLFVSATDKDELNS--NQLKYSFVEN---VTDFSISELSGAI RVAASLDA  
**OlFmi** FDRSPLHTIGRVKETDRIGT LALTVSASDADESGSGDQLKYSFVQN---VTDFSISELSGKIRIAASLDR  
**ScFmi** FVGLP--YNAQVFENLVRRT RVFTVLTSDDDYSINNRGVRFSLNQS--AANSEFRIEHLTG VVRTTRTLDR  
**AqCelsr3L** FSRS--FYSGNITENSPPG TPILSLSLKNPQ--VPRHLEITYKLGSPDVLAYLTIISP-LGLLVSSLPIDR

1130 1140 1150 1160 1170 1180 1190  
 ....|....|....|....|....|....|....|....|....|....|....|....|....|....|....|....|  
**MmCelsr1** ENVAVYNLWALAVDRGSP NPLSASVGIQVSVLDINDNPPVFEKDE-----LELFVEENS PVGVS  
**DrCelsr1b** ENVALYTLKAFAMVDKGV P-PLKAAVDIQVSVLDINDNAPVFEKDE-----LYIYVEENS AVGST  
**DrCelsr1a** ENVPVYNLRAYAVDRGVP -PLKAAVEIQVSVLDINDNAPVFEKDE-----LYIDVKENS PVDSV  
**MmCelsr2** ENVAQYVLRAYAVDKGMP -PARTPMEVTVTVLDGNDNPPVFEQDE-----FDVFVEENS PIGLA  
**DrCelsr2** ENTAIYNLQAFAMVDKGV P-ALKTAVDMQVTIL DVNDNPPVFEKDE-----FDIFVEENS PIGLV  
**MmCelsr3** EAVPVYELTAYAVDRGVP -PLRTPVSIQVTVQDVNDNAPVFEPAEE-----FEVRVKENS IVGVS  
**DrCelsr3** -----  
**DmStan** ESVAVFHLLTAIAVDKGS P-PLSSTVEVQIRLEDVNDSPPTFASDK-----ITLYVPENS PVGVS  
**ChFmi** ETIERFTFEVLAI DQGT P-ALQSTSTSVIIDIEDVQDSNPVFEKTV-----YNFTIPENS --LVE  
**TaCelsr** ETVPEYTI VVTAIDKGR P-PKHSFATVKITITDVKDSPEEFYPKE-----YDAYLPENS PAGTT  
**OcFmi** ETEPVYHFQVQAVD SGIP-PQTGVVNVTVTIVDVVDNPPQFSKLL-----YEASVFNENS DLRSF  
**OlFmi** ETVSVYHFQVQAVD SGIP-PQTGVVNATIHVIDVGDNPPPEFEKSV-----YDASVNEGS DVGTS  
**ScFmi** ETRDRYRILVYARDTGT P-ALTSELYVDIEVLDVDPDNSPRET AIASARPPANSSACYQTYIVENMPAGTH  
**AqCelsr3L** E---RYPSLTARVVAEYNK SIHTEATVSI TVLDQDPDTTPVELQEY-----YTVSVQAPLPVSKG

1200 1210 1220 1230 1240 1250 1260  
 ....|....|....|....|....|....|....|....|....|....|....|....|....|....|....|....|  
**MmCelsr1** VARIRANDPDEGP-NAQIMYQIVEGNVPEV FQLDLSG----DLRALVELD FE-VRRDYMLVQATSAPL  
**DrCelsr1b** LARVSATDPDEGT-NAQILYQIVEGNFPEV FQLDIFSG----DLIALTDLDYE-TKMEYVIVVQATSAPL  
**DrCelsr1a** VARITAMPDEGT-NAQILYQIVEGNIPEV FLDIFTG----DLKALVDLDYE-TQKEYVIVVQATSAPL  
**MmCelsr2** VARVTATDPDEGT-NAQIMYQIVEGNIPEV FQLDIFSG----ELTALVDLDYE-DRPEYVIVVQATSAPL  
**DrCelsr2** VAHISASDPDEGS-NAQIMYQIVEGNIPEV FQLDIFSG----ELTALTDLDYE-TRAEYVIVVQATSAPL  
**MmCelsr3** VAQITAVDPDDGP-NAHIMYQIVEGNIPEL FQMDIFSG----ELTALIDL DYE-ARQEYVIVVQATSAPL  
**DrCelsr3** -----  
**DmStan** VGEIHAHDPDEGV-NAV VHYSIIGGDSNAFSLVTRP CSERAQLLTMTELDYESTRKRKRFELVVR AASPLL  
**ChFmi** VGRIRATLADDAFRHSMVYS FT---KYQTTFRIASLQ G----IIRANSPLDYEKQHQLHVRVVS DSGR  
**TaCelsr** VVQLNATSKDEGT-NAFITYEATS GFEPRIE HVNSSNG----VVTTLRPLDFE-IRRTYQIRVRAQSPFF  
**OcFmi** VTQVKATSRDSSVPDS DIRFSIRGGNDPKTEIDPQSG----VITLIAEVD AE-ILGDFLLVRAELQHQ  
**OlFmi** IVRVKATSRDSSVPDS AIRYSITSGNVPPTEAIDERTG----DIALAVEVD AE-TTPSFLLQVRAQVESR  
**ScFmi** IMTVHATVPDISVEQSSIRYRLMSVSPDELEHLNSSTG----ELTSGAVLDRDKGQLFY TARVDAYTD FV  
**AqCelsr3L** LLVLNAITQDSSP----ITYSLVG--SSDI FTLNSATG----SLDTLTEL SAP---NSYTL LAKATSSSG

```

                1270      1280      1290      1300      1310      1320      1330
                .....|.....|.....|.....|.....|.....|.....|.....|.....|.....|.....|.....|.....|.....|.....|.....|
MmCelsr1  VSRATVHIRLLDQNDNPEELPDFQILF----NNYVTNKSNSFPSPGVIGRIPAHDPDLSDSLNYTFLQNE
DrCelsr1b  VSRATVHVLLVDVNDNDEVLQDFEIIFF----NNYITNKSSSFNGVIGKVPARDPDVSDKLIYTFVEGNE
DrCelsr1a  VSRATVHVRLIDVNDNDEVLQNFEEIFF----NNYVTNKSNSFPSPGIIGKVPARDPDVSDKLYSFIIEGNE
MmCelsr2  VSRATVHVRLDRNDNPPVVLGNFEILF----NNYVTNRSSSFPGGATGRVPAHDPDISDSLTYSFERGNE
DrCelsr2  VSRATVHIKLIKNDNVPVLKNFQIIF----NNYVTDKTNFSPSGVIGRIPAQDPDVSDQLHYSFEAGNE
MmCelsr3  VSRATVHVRLVDQNDNSPVLNNFQILF----NNYVSNRSDTFPSGIIGRIPAYDPDVSDHLFYSFERGNE
DrCelsr3  -----
DmStan    RNDAHIEILVTDVNDNAPVLRDFQVIF----NNFR----DHFPSGEIGRIPAFDADVSDKLHYRILSGNN
ChFmi     EDTAVVNVHVEDVNDHPPILEDIFYIFLN-----ALNGKYDPMFVPAEDPDVSSVLRYGIIITGNE
TaCelsr   FTETTVTIHIIDVNDNPEPTIQNYTFLLNYFP-----DYYPTASVGLNATDPDISDTLTFAIIOGNN
OcFmi     FSDVRVNVQVLDENDNPPQVLPPLTMHL----IVIEG----FFRRTTIGKVRAIDPDPTAILIQDLVGTLP
OlFmi     FGDVLVNVRLDLNDNPPPEILPLTIHL----IIIEG----FFRGTSTGRVRAVDRDSTAVLRQSLVGEMP
ScFmi     SGSCETIIRVRDNDNPPQVRDTRDVVAN-----LLRSSFQGGVIGQVRIIDPDISLVVQTPLSSPGF
AqCelsr3L LYNTARVHVRVFGPSRPPQLRPSSLFLS----TFSYLLPSVSLLDIG--TFVNGQRRNGFGLSLNPSSC

```

```

                1340      1350      1360      1370      1380      1390      1400
                .....|.....|.....|.....|.....|.....|.....|.....|.....|.....|.....|.....|.....|.....|.....|.....|
MmCelsr1  LSLLLLDPATGELQLSRDLNDRPLEALMEVSVSDGIHSVTALCTLRVTIITDDMLTNSITVRLNMS-Q
DrCelsr1b  LGLLILNQDTGELKLSKDLNDRPLEALMRVTVSDGLHQVSALCTLRVTIITDDMLTNSITVRLNMS-Q
DrCelsr1a  LSLLILNPDTGELKLSKDLNDRPLEATMKVSVTDGIHQVTAFACTLRVTIITDEMLTNSITVRLNMS-Q
MmCelsr2  LSLVLLNASTGELRLSRALDNNRPLEAIMSVLVS DGVHSVTAQCCLRVTIITDEMLTHSITLRLDMS-P
DrCelsr2  LKLVILNQSTGEIRLSRALDNNRPLEAMKISVSDGVHSVSAQCCLQVTVITDEMLNSITLRLANAS-Q
MmCelsr3  LQLLVNRTSGELRLSRKLDNNRPLVASMLVTVTDGLHSVTAQCCLRVVIITEELLANSITVRLNMS-Q
DrCelsr3  -----MLSSSITVRLQNMS-Q
DmStan    ANLLRLNSSSGGLVLSPLQNTNVPKFATMEVSVSDGINEAKAIMQLSVRLITEDMLFNSVTVRLNEMT-E
ChFmi     HDFISLNDETGELFLKKSIIINT-AAEIEILFEVSDGKYADRAYGHILVSEVTDVMKNSMFIVLNNATRN
TaCelsr   DRLLQLNRTSGEIIYLSPSAGNVQE-SRQMTISVSDGIHVARSTLSLKVIAVTSVTLKNIIVLRFNTNII-P
OcFmi     SDFIEFDNATGSVIALPGISQG---EYVINTTVSDGQAEAWGLTHIDVTMVSNAFDNAIVLRIDSFT-R
OlFmi     STFLEFENASGTIFASPLSSG---SYVINTTATDGVTTASGLTRVDVTIVSNATFVNAVTLRIVDFT-R
ScFmi     DSGFFTLARDGSIAATRSVLPGVYKLRSSADDQNAAHSRAEGTTTVHVRWISDTSLQHSVSMQVSGSRDL
AqCelsr3L SADKYFRITEGSLYVLNTITSG---SHQLNISVTDGRVIWSETITVYANLLTNDSLDHTLSLALPNLS-L

```

```

                1410      1420      1430      1440      1450      1460      1470
                .....|.....|.....|.....|.....|.....|.....|.....|.....|.....|.....|.....|.....|.....|.....|.....|
MmCelsr1  EKFLSPLLSLFVEGVATVLTSTT-----KDDIFVFNIQNDTDVSSN-ILNVTFSALLPG-----G
DrCelsr1b  ERFLSPLLSLFVAEGVAAVLSTS-----PDGIFIFNVQNDTDVSGS-ILNVTFSALLPG-----G
DrCelsr1a  ERFLSPLLSLFLVKGVAAVLSTS-----REGVFI FNVQNDTDVSGN-ILNVTFSALLPG-----G
MmCelsr2  ERFLSPLLGLFIQAVAAATLTP-----PDHVVFVNVQRTDAPGGHILNVLSVSGQP-----PGPG
DrCelsr2  ERFLSLLLLAQFLEGVASVLSAS-----REDVVVFNIQDDTDVSAG-ILNVLSVALPGQGSRGRGVSQG
MmCelsr3  ERFLSPLLGHFLEGVAAVLATP-----TEDVFI FNIQNDTDVGG-TVLNVSFSA LAPR-----GAGAG
DrCelsr3  ELFLSPLLTHFLDGVSAVLSVS-----PDDVVFVNVQPDADAG--KVLNVSFSAALP-----
DmStan    EAFLSPLLNFFLDGLAAIIPCP-----KEHIFVFSIQDDTDVSSR-ILNVSFSAARRP-----V
ChFmi     DFLKATVLRKFKKDSLAQIFDVDGSKIVDASKIFILSIEAFRDPRKGNKNAEMLEIAIAVKS-----K
TaCelsr   ETFITNMTSLLTNTIAGIMRCQ-----SRDIYILNVQDDVAGQN-ILNVTISGWDRTN-----
OcFmi     ERIVKDHTDKLRLASLAKWIPCR-----QEDIQIFSVESFG---SLVDLFAVKKADGS-----
OlFmi     RRIVKDHTLNKLRLSLAKWIPAR-----SENIQIFSV EIVEDSSSLVDVLFVKNDDG-----
ScFmi     ADFVQHYLLRTSAAIERLLTTM-----PGSVEIFTVRETTGALGDGAVDLIFAVRSRS-----
AqCelsr3L DHFLGRFLSPFRSALSHMLSCM-----HECLHIISVDELPGARGVKVVIAAKEKDLVT-----

```

```

          1480      1490      1500      1510      1520      1530      1540
    ....|....|....|....|....|....|....|....|....|....|....|....|....|
MmCelsr1 TRGRFFPSEDLQEQLYLNRTLLT--TISAQRVLPFDNCLREPCENYMKCVSVLR-FDSSAPFISSTTV
DrCelsr1b APGRYFPSEELQEQLYLNRTLLM--LISTQRVLPFDNCLREPCENYMKCVAVLK-FDSTAPFVASNTV
DrCelsr1a VPDRYFPSEELQEQLYLNRTLLQ--EISSQNVLPFDNCLREPCENYMKCVSVLK-FDSSPPFIASDTV
MmCelsr2 GGPPFLPSEDLQERLYLNRSLLT--AISAKRVLPFDROHLLREPCENYMKCVSVLR-FDSSAPFIASSSV
DrCelsr2 SEVEFFGSEELQERLYLNRSLLA--QISSQEVLPFDNCLREPCENYMKCVSVLK-FDSLAPFVASDTI
MmCelsr3 AAGPWFSSSEELQEQLYVRRRAALA--ARSLLDVLPFDNCLREPCENYMKCVSVLR-FDSSAPFLASTST
DrCelsr3 --GGQFFPSEALEEQYLYLNRPRLN--ALAHMEVLPFDNCLREPCQNYMKCISVLR-FNSSAPFIASPST
DmStan SHEEFYTPQYLRERVYLNRAILA--RLATVEVLPFDNCLVREPCLNFEELCTVVK-FGNASEFIHSDTV
ChFmi MADTYMTADFLKDKFYLNATAFTRSGFDLVSFDFWGEYFCGSESKNLERCSIQWSNTNQSISTIKSKYV
TaCelsr --NRYYLQNYFRDSIYIYREQLL--AKG-FNLLPFDGGYCLPQPCSPNYDCVVNFG-ASLDNAVSTPKI
OcFmi --GGFISRNDVVLQMDLNSSPIE--KESGLLFDEVNVDICLREPCKNFQACTNQLA-VQTETNAIFKDDV
OlFmi ---GFVSRGDVIGQIDLHSSAIE--KESGVSFEDVNLDICLREPCKNFQVCTNHLA-VQTATNPVVKDDV
ScFmi --GAYMGPVIVIESIDVQQVMFY--QHSGLRINFINLDTCRTEPCNYFQDCLDLSVR-FTGENTTIVAGNT
AqCelsr3L ----YKSSLELRRTIEAEIGHIS---SALSWTVAVMLDSCSSSPCPNPLRQCSPYVSLALPHKTTITSQSL

```

```

          1550      1560      1570      1580      1590      1600      1610
    ....|....|....|....|....|....|....|....|....|....|....|....|....|
MmCelsr1 LFRPIHPITGLRCRCPPGFTG----DYCETEIDLCCYSNPCGANGRCRSREGGYTCECFEDFTGEHCQVNV
DrCelsr1b LFRPIHPVNLGRCRCPDGFTG----DYCETEVDLCCYSGPCQNNKCRSKEGGYTCECPQDFTGERCEVNA
DrCelsr1a LFRPIHPINGLRCRCPAGFTG----DYCETEIDLCCYSGPCRNNGCRSREGGYTCECLEDFTGENCEVDS
MmCelsr2 LFRPIHLVGGRLRCRCPPGLTG----DYCETEVDLCCYSRTCGPHGRCRSREGGYTCLRCGCYTGEHCEAST
DrCelsr2 LFRPIHPIAGLRCRCPLGFTG----DYCETEIDLCCYSRPGCAHGVCRSHEGGYTCHCMQDYTGERCIESS
MmCelsr3 LFRPIQPIAGLRCRCPPGFTG----DFCETEIDLCCYSNPCRNNGACARREGGYTCVCRPRFT--DCELDT
DrCelsr3 LFRPIHPITGLRCRCPAGFTG----DYCEIEINLCCYSNPCMNGGVCARREGGYTCICREDYTGERCDFDR
DmStan LFRPIYPVNTFACSCPEGFTGSKEHYLCTDEVDLCCYSDPCQNGGTCVRREGGYTCVCPSTHTGQNCETGV
ChFmi IFRGIYFKPTLKCCECPHRFHG----MKCDKPFNMCFMERCNSNGKCISTDGFSCKDHGYQDFCAFDR
TaCelsr IVRNIRQAKRYACECPVGYTG----LRCNRMRLCRSNPCGNNKCVNIENGYTCICNSGYAGINCEIGS
OcFmi LFLSLQRRISYCTCPCSGFVHSWNPNSCLEQINSCLSEPCFLGGTCVNIILDGFECKCRHGTIGNRCEIPC
OlFmi LFLSLQRRISHTCTCPCSGYVHSWNPNSCSERIDSCLSQPCLFGGTCVNTLDGFECKCAAGIVGKTCVPC
ScFmi SFTSLLSKRSFSCCTPLGYQHTWHSNSCQREVDECASSPCKYGGSCIDMLSGYKCLCLANTTGPACETFC
AqCelsr3L LVKSLSSASAHKCVCPRGYDS----KCTSELNECEPSPCDYDAVCTDLINDYHCSCPPFTFGKNCSTPC

```

```

          1620      1630      1640      1650      1660      1670      1680
    ....|....|....|....|....|....|....|....|....|....|....|....|....|
MmCelsr1 R--SGR---CASGVCKNGGTCVNLLIG-GFHCVCPPG-EYEHFYCEVSTRSFPPQSFVTFRGLRQR-FH
DrCelsr1b R--SGR---CVPGVCKNGGRCLDLLVG-GFMCQCPDG-EYEKPYCQMSTRSFPGQSFITFRGLRQR-FH
DrCelsr1a R--SGR---CVPGVCKNGGECVNLLVG-GFTCNCPSPG-EYEKPFCEMTRSFPGQSFITFRGLRQR-FH
MmCelsr2 H--SGR---CTPGVCKNGGTCVNLLVG-GIKCDPCSPG-HFEKPFQVTRSEFPARPFITFRGLHQR-FH
DrCelsr2 R--SGR---CAEGVCKNGGTCNLLVG-GFRCECPSPG-GFEKPFCLLSRNFPQPFTITFKGLRQR-FH
MmCelsr3 E--AGR---CVPGVCRNGGTCNAPNG-GFRCCPAGGAFEGPRCEVAARSEFPSSFVMFRGLRQR-FH
DrCelsr3 R--GGR---CVAGVCRNGGTCRELSGG-GFRCECPAG-GYEKPYCSVTRSEFPKSFMMFRGLRQR-FH
DmStan G--HLRP---CPSETCEGGLSCLSNYPS-SQPPPYTAT-----CELRARAFGRNSFLT FESLKQR-HR
ChFmi QTSSCPIQLNLAKNPCGLRGACSAKSGG-GFDCTCPAK-GTDTEYCKLSTRYFPKGSYIAMPGLKKQORN
TaCelsr C-----ASQPCKNGASCVENANGQGYCTCPKY--YGGPLCDAIERSFPGNSYVTVGGIKQR-WR
OcFmi PSLSCAL---CEPNPCLNGGVCVSDSNMAFSCRCPSPG--FDGPLCEQTAHFQDYGSLLAFSPPFGR-WK
OlFmi PSLSCKL---CDPNPCRNGGRCVVDENGSFAFSCPCPSG--YDGPICEQATAHFQDYGSLLAFSPRLGR-WG
ScFmi PSASCDF---CEPNPCMNGGTCITTSRSG-EVQCVCCKDG--FDGPCCQMTLASELEGDYVAFPSLTSR-WQ
AqCelsr3L RFSAPCS--ACSPNPCLNGGSCSIQSEG TISCTSCPAG--YTGPLCELTVARVSGAGGASLEPLGRQ-RE

```

```

          1690      1700      1710      1720      1730      1740      1750
    ....|....|....|....|....|....|....|....|....|....|....|....|....|
MmCelsr1  FTVSLAFATQDRNALLLYNGRFNEKHDFIALEIVVEEQQLQLTF SAGETT-----TTVTPQVPGGVSDGRW
DrCelsr1b  FTLSFMFATRERNALLLYNGRFNEKHDFIAIEIVKEQIQQLTF SAGESK-----TTVTPFVAGGVSDGQW
DrCelsr1a  FTVSFMFATRERNALLLYNGRFNEKHDFIAVEIEEQIQQLTF SAGESK-----TTVAPFVPGGVSDGQW
MmCelsr2  FTLALSFFATKERNGLLLYNGRFNEKHDFVALEVIQEQQVQLTF SAGEST-----TTVSPFVPGGVSDGQW
DrCelsr2  FTLLSLFFATREPNGLLLYNGRFNEKHDFIAMEIVNQIQQLTF SAGGTK-----TTVLPFIEGGVSDGHW
MmCelsr3  LTLLSLFFATVQPSGLLFYNGRFLNEKHDFIALELVAGQVRLTYSTGESN-----TVVSPVPGGLSDGQW
DrCelsr3  LSISLSFFATLESNGLLFYNGRFNEKHDFIALEIILDGQMVLYKYSTCESS-----TQVSPYLPGGVSDGNW
DmStan     FNLKLRFAFVQENGLLLYNGRYNELHDFIALEIHEGHVSFSFSLGDHS-----ERISVIEAKVSDGKW
ChFmi     FDISFQFRTFQANAVLLYNGRYSNQNDFAVEIVDGVVVFVSVNEGKSKDNKEQVTVQSFNAGGVNDGKW
TaCelsr   LEISVQEFATIHDNGLLLYNGRYNHRGDYLALELINGKVRVLSFSTGTDK-----YSATANIEGNVNDGKW
OcFmi     LSFSLFEFSTVDPNGLIMYNSRLGEQYDFVALELVGGQLYFLFSFGSST-----AKAVAKSQTSLADGQW
OlFmi     FDIRLDFATVDPNGLMMHNNRNLGEQYDFIALELDAGQITCSI SFGSLT-----ETVVARSQVPLSDGEW
ScFmi     LKLSLSFVFTARSNGLLLYNGRLLGTQYDFIALELINGRLQCQISLGNP-----VKFTTLNTRVLSDAKW
AqCelsr3L  VEFSDFDIFGVQPNAMLLHAGQLNNGEDYIAIGLVLGNLQVSVRWGNWS-----VRTTLLSSKNGSLNDGQW

```

```

          1760      1770      1780      1790      1800      1810      1820
    ....|....|....|....|....|....|....|....|....|....|....|....|....|
MmCelsr1  HSVLVQYYNKPNIHGLGLPHGPSGEKVAVVTVDDCAA VAVHFVGSYVGNYS CAAQGTQSGSKKSLDLTGP
DrCelsr1b  HTIHLHYYNKPNIGRLGVPHGPSQEKVAVVALDDCDVAMALRFGGQIGNYS CAARGTQTGQKSLDLTGP
DrCelsr1a  HSVQLHYYNKPKI SHLGLPQGPSGEKVAVVAVDDCDIAMAVRFGTQIGNYS CAAQGTQTGQKSLDLTGP
MmCelsr2  HTVQLKYYNKPLLQGTGLPQGPSEQKVAVVSV DGC DTGVALRFGAMLGNYS CAAQGTQGGSKKSLDLTGP
DrCelsr2  HTAHVHYYNKPV LNRAGLPQGPSDQKVVVVTVDDCDSSVALRFGHVGNYS CSAQGSQLGSKKSLDLTGP
MmCelsr3  HTVHLRYYNKPRTDALGGAQGPSKDKVAVLSV DDCNVAVALQFGAEIGNYS CAAAGVQTSSKSLDLTGP
DrCelsr3  HTVHIHYYNKPKRSVSGEVQGPSDEKVAVLSV DDCDTAVSLRFGAQLGNYS CAAQGRQTSSKSLDLTGP
DmStan   HQVEVVYLNRSVTLVLDNCDTAIALSGQLGDRWSCANRTTLKLDKRC S-----LLTETCHRFDLTGP
ChFmi   HTVKVQLKNKVISIAVGESECDIETASVLSQGT HR-----YCAASTRVQGMKTLDTAP
TaCelsr  HTVSVKYL N-----QVASVSDYCDTDLAIRYGSTIGNYS CAATRLSQDGKSLDVTAP
OcFmi   HTVTVNLANQVADLSVTNCQNPDTSNDALIYEDD-----FICSGSKKPEGETKSLDLTGP
OlFmi   HSVTIRLVDKTLHLTVDNQNPDSNDARIYEDD-----FIC SASGTPKGNARSLDVTGP
ScFmi   HTVTLELKD LAVKMRVDG CYHEHKSASF LDDFICQEIRN-----ITEEVNIDRKRFRMGRSLDLGPP
AqCelsr3L HSVVEFRLNDMTLDIVLGNCI ESEVILERD-----IVNCSVSI PVQTSSKIINLDSS

```

```

          1830      1840      1850      1860      1870      1880      1890
    ....|....|....|....|....|....|....|....|....|....|....|....|....|
MmCelsr1  LLLGG-VPNLPEDFPVHSR--QFVGC MRNLSIDG----RIVDMAAFIANNG--TRAGCASQR-NFC DG--
DrCelsr1b  LLVGG-VPNLPEDFPVQNR--DFVGC IKNLTIDS----KPIDMANFISDNG--TAAGCAA KR-DFCSQ--
DrCelsr1a  LLLGG-VPNLPEDFPIRNR--DFVGC MRNLTIDS----KSVDMASYIANNG--TTEGCPAKK-NFCYE--
MmCelsr2  LLLGG-VPDLPESEFPVRMR--HFVGC MKDLQVDS----RHIDMADFIANNG--TVPGCPTKK-IVCDS--
DrCelsr2  LLLGGGVPKLPPEEFPVQNR--QFVGC MKDLRIDE----RHVDMAGFIANNG--TLPGCSAKR-NFCNN--
MmCelsr3  LLLGG-VPNLPENFPVSHK--DFVGC MRDLHIDG----RRMDMAAFVANNG--TMAGCQAKS-HFCAS--
DrCelsr3  LFLGG-VPNLPENFPFSTR--EFVGC MKDLHIDN----RPVDMAGFIANNG--TLPGCSAKL-PFCKS--
DmStan   LQVGG-LPRIPAHEFPVTNR--DFVGC ISDLRIDD----RFVDLNSYVADNG--TLAGCPQA-PLCQS--
ChFmi   ALIGG-LPDMQRTFISPVK--DFVGC MRNIVFDH----NSLDLSNYLHNFG--SAANCPAPE-PSCNDA Y
TaCelsr  LQIGG-VPTIRDTPMAFKKNDFVGCIRNLYINS----KLIPLDNFYVNNG--SVIGCRQTD-QRCQGG S
OcFmi   LYFAG-VENIDFRYPTSSL--NEFGC MRNIEVNG----KLLDLASARKSIN--TLNSCPPKS-RFCDS--
OlFmi   LYFGG-IENTFFDHP TNNV--NEFGC IRNVEIDG----HLLDFSTATKNVK--TVNGCPPKL-SYCDS--
ScFmi   LYIGG----LRSAFNSELSNQHFVGCIRDIVVNE----QYLD FSSSIDQSAGVTL SAC PPLSSQFC DG--
AqCelsr3L LYLFNSLGESTNQIPSLAQ---FTGCLSNVKIGGERNGKLVDFSSVPTHPGASLLPGCPQSS-SSCQS--

```

1900 1910 1920 1930 1940 1950 1960

.....|.....|.....|.....|.....|.....|.....|.....|.....|.....|.....|.....|.....|.....|.....|.....|

**MmCelsr1** -TSCQNGGTCVNRWNTYLCECPLRFGGKNC EQAMPHPQRF TGESVVLWSDL--DITISVPWYLGLMFRTR  
**DrCelsr1b** -AVCQNGGVCVNRWNTHTCNCPLGYGGKNC EHVMPAPLHFDGHALVSWSDT--DITIAIPWYMGLMFRTR  
**DrCelsr1a** -GLCQHGAQCENKWNTHFCCEPEGRGGKNC DQDMPSRQHFDGHAMMLWNDP--DMTIAVPWYIALMFRTR  
**MmCelsr2** -SICHNGGTCVNQWNTFSCECPLGFGGKSCAQEMANPQRF LGSSLVVAWHGL--YLPISQPWHLNLMFRTR  
**DrCelsr2** -NPCLNGGSCVSLWGSFRCD CALGFGGRNCEKVM SNPLRLQ GKGLLWADL--ASVMTPPWHMEFMEFRTR  
**MmCelsr3** -GPCKNNGFCSERWGGFSCDCPVGFGGKDCRLTMAHPYHFQNGTLSWDFGN-DMAVSVPWYLGLSFRTR  
**DrCelsr3** -NPCQNGGTCRVSWETFS CDCPVGFGGKDCSLVMSHPHRFLGSSALWWDLKN-EVTITTPWYMGLVFRTR  
**DmStan** -EPCFNGGTCREGWGTYSCECPEGYAGNSCQDNIPAPWRFSGDGSLSFNPL--LRPIQLPWTTSFSLRTR  
**ChFmi** CTKYVNG-DCHETFDDGPKSCRSRFRVQRC EKAA-EPIRLNANSVLVDDSQASGTSFSAWRYSMVVKTT  
**TaCelsr** ISPCSSGAECVDVYDGFRCRC PANIGGKTCQDTIVRTWRF TDQSIIYPLPPLQNTITAPWSLSLIFRTR  
**OcFmi** -NPCLEGGACADVWNGFYCSCPTGNDGPQCSVVS--AFQFDGQAYTHHLS----KPTFLESFSVTFRTS  
**OlFmi** -DPCKNGGTCSSVWKGYYCSCPTPGHGGQQCDVSS--AFQFDGQSYRHYHFS----KAVFLRTFSVSRTR  
**ScFmi** -AVCGNNGVCQNVWNTSYCGCMPDFGGKQCEHAKVYKAKFTGQSF IQYYLS----QQFFRGRRLTFRTR  
**AqCelsr3L** --SCGGDGKCI EFWNGSRCHSDSNDATEAISFDGSSSSSYVVSISAGTSM S-YSSPFNVMNISFDMRTL

1970 1980 1990 2000 2010 2020 2030

.....|.....|.....|.....|.....|.....|.....|.....|.....|.....|.....|.....|.....|.....|.....|

**MmCelsr1** KE--DGVLM EATAGTSSRLHLQILNSYIRFEVSYGPSDVASMQLSKSRITDGGWHHLLIELRSAKEGKDI  
**DrCelsr1b** KS--TGVILQATAGEFSKINLMVTNRHLRFQVFLGNRRVALLDFPQVYVNDGGEWHHVLVELKSGKDGKDI  
**DrCelsr1a** QTSQTATLMQVNAGDTSQINLLIRDKYVQFEVLLGEQKVAVLDFTDV RVNDGGEWHHLLVELRSSKDGKDT  
**MmCelsr2** QA--DGVLLQAVTRGRSTITLQLRAGHVRLSMEGTGLQASSLHLEPGRANDGDWHHAQLALG-ASRGP--  
**DrCelsr2** QP--TATVMHMSSGQQHNFTIQLREGFVVTSVQ-RGEDSVVSRVDDVTVSDGQWHHVSLELKG PATGG--  
**MmCelsr3** AT--KGILMQVQLGPHSVLLCKLDRGLLSVTLNRASGHTVHLLLDQMTVSDGRWHLRLELQEEP GGRRG  
**DrCelsr3** SK--EGVLLQAQAGQYTNLIFQVVGGLVFSVARGSTRPVRLRLDQVQVCDGRWHLQLELRDVRSGRET  
**DmStan** QK--EAFLLQIQIGQNSSAAVCLRQGVLYYIFDGEPMYLAGAFLS-----DGEWHRVEIRWQQGSEIH--  
**ChFmi** QKD---AVILEETINGVDGRMLMLKQYLQYHHKS----KLILVLD SFFMANGKWNQIQIKWTANR-----  
**TaCelsr** LRN---AYLSYMTDSQRDIVLMIENGLLKYKFG-----NYETVVKYIRVNDGGEWHEARIEWEKSG-----  
**OcFmi** NLD-----ATLFS TATLLQLRNHGVQLIFNVTSLS--EAI FMTNVI AVNDGLWHHDITVTFKEGTELS--  
**OlFmi** QAD-----ATLLSTGR TQLQIRNGHIQLLFNVTSSSQTEGIFMNDVVAVNDGRWHSIAVTIQSGTELS--  
**ScFmi** QAN-----STLWYTDHSTLDV LHGQLAYSFLAGS-KSYHMRLGDIQVDDGLWHQAVIDLGDGRSTRLS  
**AqCelsr3L** QDG----YTHVLAIGDKGDLELFLYGS LIFNYRPPSPMLRPLSLTADARVNDGYWHGIKLSFS-----

2040 2050 2060 2070 2080 2090 2100

.....|.....|.....|.....|.....|.....|.....|.....|.....|.....|.....|.....|.....|.....|.....|

**MmCelsr1** KYLAVMTLDYGM DQSTVQIGNQLPGLKMR TIVIGVGT--EDK-VSVRHG-FRGC MQGVRMGETSTNIATL  
**DrCelsr1b** KYMALVSLDYGMFQRTVEIGNELPGLKLRNLF IGGLL--KKD-DTVQGG-FNGCMQGV RMGETSTNIANI  
**DrCelsr1a** KYMAQVLLDYDMFKKSVEIGNELPGLK LKSFFIGGLQ--GQR-DIVQQG-FKGC MQGLRMGETATSTANI  
**MmCelsr2** -GHAILSFN YGQQTAEGNLGPR LHGLHLSNITVCGVP--GPA-SGVARG-FRGC LQGV RVSETPEGVHSL  
**DrCelsr2** -VTATLSLDYGLYTSSMDLDSK LKGVRLK TSLVCGVS--DGR-NRVIGG-FRGC IQGLRIGGDSSTPAFP  
**MmCelsr3** HHI F MVSLDFTLFQDTMAMGGELQGLKVKQLHVGGLP--PSSKEEGHQG-LVGC IQGVWIGFTPF GSSAL  
**DrCelsr3** RYIATVRLDFGLYQGTVIVGNEINGVKV KHLHVGGVL--GSG--EVQNG-IRGC IQGVRLGVRPD-SPAL  
**DmStan** -----FSVDYQGRSGSVPM SQVKVQGLYVGVKIVM CSPD--GSIGAVPEASPFEGCIQDVRIG----AGQSV  
**ChFmi** -----LYLSSLYDQHSVSTPLPLTTLSL KMTSEGGTG-----NNKLLACIKAF TYNDNDI  
**TaCelsr** ---VFLKLDYNSYQASFQLDLSRP-VQINQIMFGNR--VIN-SSTS IATI QNGFDGCMQGI ANDRQIA  
**OcFmi** LDYGRFTATTSYVETATVTNVYVGGRHIGSKNVIDEF--SGCLDAVQIN-GRALPFVNGI SALT SRGGNL  
**OlFmi** LDYGRFRVIVSDVETAPVTNVYVGGKHVGPKNVDRF--SGCVD RTEIN-GEVVPSASGVVARKFAGVDV  
**ScFmi** LDYGKYSAML PVTESQTTFNVLGAAISSAAATCVKSNFKGCMHSAFLGSDMLS LDPSGATTD SAVTASA  
**AqCelsr3L** ---SSLTRLSIDDERIVADSNQTTIT IATSRVELG GRE-----GSHSRSYDGCIRNLRINSETVDDDDNY

|                  | 2110           | 2120             | 2130       | 2140    | 2150    | 2160     | 2170             |                   |                  |
|------------------|----------------|------------------|------------|---------|---------|----------|------------------|-------------------|------------------|
| <b>MmCelsr1</b>  | NMNDALKVRVKDGC | DVEDPCAS----     | SPCPHSHCRD | TWDSYS  | CI      | CDRG---- | YFGKKCVDACLLNP-C |                   |                  |
| <b>DrCelsr1b</b> | NIRHAKRIHAKDGC | NVPDACLA----     | NLCP       | SHSHTDN | WTSHT   | CV       | CQPG----         | YFGRDCVDACLLNP-C  |                  |
| <b>DrCelsr1a</b> | NMHHAQKIRVEDGC | DMSENCDA----     | INCP       | ENSQCTD | ---     | EHTCT    | CDPG----         | FFGRDCVDACHLNP-C  |                  |
| <b>MmCelsr2</b>  | DPSRGESINVEFGC | SLPDFCDS----     | NPCPT      | NSYYSND | WNSYS   | CS       | CVLG----         | YYGDNCTNVCDLNP-C  |                  |
| <b>DrCelsr2</b>  | SMPQARVLNVESGC | SLPNTCGS----     | NPC        | FAHSDCK | KDDWAH  | SCR      | CHTG----         | YYGNSCTDACALNP-C  |                  |
| <b>MmCelsr3</b>  | L-PPSHRVNVEFGC | TVTNP            | CAS----    | GPC     | PHADCK  | DLWQ     | TFSCT            | CRPG----          | YYGPGCVDACLLNP-C |
| <b>DrCelsr3</b>  | P-RPSRTIKVETGC | NVGNPCNS----     | SPC        | PTHSQCT | DEWDRHT | CV       | CEPG----         | FYGKSCMDACQLNP-C  |                  |
| <b>DmStan</b>    | LSRPTIRENVEDGC | ESRAQCP----      | DHCP       | NHSSQSS | WDLST   | CE       | CDSG----         | YVGTDCAPICQVLRP-C |                  |
| <b>ChFmi</b>     | NLLHTSNKHVQKGC | LESSLCDT----     | LDC        | GTGTCQ  | ITSGVA  | QCH      | CNGAG----        | YKGPQCVDICKDSP-C  |                  |
| <b>TaCelsr</b>   | VTSFTVQQNVGAN  | CNIGNPCAS----    | NPC        | SQSS    | VAEWNRY | TCK      | CSTG----         | YVGPCKISACSLNP-C  |                  |
| <b>OcFmi</b>     | TVKTTSSPSIKTGC | DSDVMCAS----     | LQCP       | AHSRC   | MEP---  | AS       | CECSLG----       | RKGRQCVDVCLVNP-C  |                  |
| <b>OlFmi</b>     | GVTTTAVVG-VTPG | CPN--LCDS----    | TRCP       | ANSVC   | VEP---  | AS       | CRCTSG----       | HKGRQCVDVCASQP-C  |                  |
| <b>ScFmi</b>     | LQISSSPQNI     | GRGCLSAAVCAA---- | YPC        | SRHATC  | IDewe   | QYRC     | CEPPF----        | FSGRKCLDVCYQDR-C  |                  |
| <b>AqCelsr3L</b> | N---VTLIGTVTGC | SNKSPCDS         | SSSSSYTG   | CFANSY  | CI      | EGWRASS  | CM               | CDSRSYFHN         | GGTCVQPCNQPVNC   |

|                  | 2180      | 2190     | 2200           | 2210         | 2220 | 2230      | 2240   |      |       |       |      |       |     |
|------------------|-----------|----------|----------------|--------------|------|-----------|--------|------|-------|-------|------|-------|-----|
| <b>MmCelsr1</b>  | KHVAACVRS | PNTPRGYS | CECGPG-----    | HYG          | QYCE | ENKVDL    | PCPK   | GWG  | GNP-V | CGP   | CHCA | VSQ   | GFD |
| <b>DrCelsr1b</b> | EHTSSCVR  | KPSTKR   | GYSCDCGHN----- | YYG          | QYCE | EHKGDQ    | PCAH   | GWG  | GNP-T | CGP   | CNC  | DL    | SKG |
| <b>DrCelsr1a</b> | EHLSTCVR  | KPSSSH   | GYTCECSQD----- | YYG          | QYCE | ENKVEK    | PCPR   | GWG  | GNP-M | CGP   | CNC  | DV    | SKG |
| <b>MmCelsr2</b>  | EHQSVCTR  | KPNTPH   | GYICECLPN----- | YLG          | PYCE | TRIDQ     | PCPR   | GWG  | GHP-T | CGP   | CNC  | DV    | SKG |
| <b>DrCelsr2</b>  | EHQSACSR  | RSSSAH   | GYTCS          | CPSN-----    | YFG  | QYCE      | EKKTDL | PCPR | GWG   | GEP-S | CGP  | CNC   | DT  |
| <b>MmCelsr3</b>  | QNQGS     | CRHLQ    | GAPHGYT        | CDVSG-----   | YFG  | QHCE      | HRVDQ  | QCP  | RGW   | GSP-T | CGP  | CNC   | DV  |
| <b>DrCelsr3</b>  | ENQAKCHR  | KPSSSH   | GYICDCEDS----- | HYG          | QYCE | QHRIEQ    | QCP    | RGW  | GSP-T | CGP   | CHC  | D     | ASK |
| <b>DmStan</b>    | AS-GVCR   | ANTSL    | PRGYD          | CECNSSS----- | RHD  | YCE       | KE     | LQ   | QPC   | PG    | GW   | GER-V | CGP |
| <b>ChFmi</b>     | NT-GTCK   | HSSSL    | SGYVCD         | CPIG-----    | FTG  | EHCE      | IAKQ   | KCP  | PK    | T     | FG   | GK    | -Y  |
| <b>TaCelsr</b>   | KNNGRC    | VMMNV    | VHYGYE         | CQCNKG-----  | FQGR | FCET      | QFGD   | KCP  | GE    | FT    | PG   | FCE   | PC  |
| <b>OcFmi</b>     | KHDGLCS   | SHTSEN   | RLGFACK        | CNSL-----    | YIG  | TLCE      | TNTQ   | WCL  | S     | GF    | Y    | GFP-N | CR  |
| <b>OlFmi</b>     | QHGGQCA   | PSDD     | SERGF          | VECASL-----  | YAG  | AFCE      | TITL   | GK   | CP    | G     | FF   | DYP-H | CR  |
| <b>ScFmi</b>     | LHNGKCH   | HSAD     | LDNIT          | CD           | CSGS | F         | PS     | R    | PS    | G     | L    | CD    | R   |
| <b>AqCelsr3L</b> | LHGGTC    | NFN      | FYEDD          | GF           | TCV  | CAAP----- | YV     | GLD  | Q     | IN    | L    | GSS   | CR  |

|                  | 2250        | 2260 | 2270 | 2280   | 2290 | 2300 | 2310 |    |    |     |     |    |    |
|------------------|-------------|------|------|--------|------|------|------|----|----|-----|-----|----|----|
| <b>MmCelsr1</b>  | DCNKTN----- | GQC  | CKEN | YKPPAQ | DA   | CL   | PC   | DF | PH | GSH | SRA | CD | MD |
| <b>DrCelsr1b</b> | DCNKTT----- | GEC  | SCK  | DNYFR  | PL   | GG   | DT   | CY | PC | DF  | H   | L  | G  |
| <b>DrCelsr1a</b> | DCNKTT----- | GEC  | RCK  | DNY    | QPK  | SD   | TC   | FP | CD | CF  | H   | L  | G  |
| <b>MmCelsr2</b>  | DCNKTS----- | GE   | CH   | CKE    | KHYR | PP   | G    | S  | P  | T   | CL  | L  | C  |
| <b>DrCelsr2</b>  | DCNKTN----- | GAC  | RCK  | DNH    | FR   | PP   | SS   | DT | CV | L   | C   | D  | C  |
| <b>MmCelsr3</b>  | NCNKTN----- | GQ   | CH   | KE     | FHYR | PR   | G    | S  | D  | S   | CL  | P  | C  |
| <b>DrCelsr3</b>  | DCNKTT----- | GH   | CH   | KE     | FHYR | RR   | G    | S  | D  | I   | CL  | P  | C  |
| <b>DmStan</b>    | DCNKTT----- | GQ   | Y    | CK     | T    | N    | H    | Y  | Q  | P   | N   | E  | T  |
| <b>ChFmi</b>     | TCDPD       | QME  | PYS  | YP     | GK   | CF   | N    | D  | D  | Y   | L   | K  | G  |
| <b>TaCelsr</b>   | ICNITS----- | GEC  | I    | CE     | D    | K    | Y    | W  | K  | S   | N   | L  | D  |
| <b>OcFmi</b>     | ICDSSS----- | GG   | CL   | CK     | V    | D    | T    | S  | P  | K   | E   | D  | V  |
| <b>OlFmi</b>     | ICTES-----  | G    | S    | V      | C    | E    | K    | D  | T  | S   | P   | I  | D  |
| <b>ScFmi</b>     | VCTDT-----  | G    | I    | C      | L    | C    | K    | D  | G  | T   | F   | S  | P  |
| <b>AqCelsr3L</b> | ICNRDG----- | V    | C    | Q      | N    | P    | D    | I  | A  | T   | Y   | G  | S  |

|                  | 2320                                    | 2330     | 2340     | 2350     | 2360     | 2370     | 2380           |
|------------------|-----------------------------------------|----------|----------|----------|----------|----------|----------------|
|                  | .... .... .... .... .... .... .... .... |          |          |          |          |          |                |
| <b>MmCelsr1</b>  | PFAEVT                                  | -----    | -----    | -----    | -----    | SLGCEVI  | YNGCPRAFEAGI   |
| <b>DrCelsr1b</b> | PFAEVT                                  | -----    | -----    | -----    | -----    | VTGCVVY  | DGCPKAFEEGI    |
| <b>DrCelsr1a</b> | PFSEVT                                  | -----    | -----    | -----    | -----    | STGCEVY  | GEGCPKAFDSGI   |
| <b>MmCelsr2</b>  | PFAEVT                                  | -----    | -----    | -----    | -----    | TNGCEVY  | NYDSCPRAIEAGI  |
| <b>DrCelsr2</b>  | PFAEVS                                  | -----    | -----    | -----    | -----    | SSGCEVI  | YDSCPQAIEAGI   |
| <b>MmCelsr3</b>  | PFAEVT                                  | -----    | -----    | -----    | -----    | ASGCRVLY | DACPKSLRSGV    |
| <b>DrCelsr3</b>  | PFAEVT                                  | -----    | -----    | -----    | -----    | QTGCEVI  | YDGCPKTITSAI   |
| <b>DmStan</b>    | PYAEVT                                  | -----    | -----    | -----    | -----    | LSGCEVY  | DACPRS FAGGV   |
| <b>ChFmi</b>     | AWQEIT                                  | -----    | -----    | -----    | -----    | NGCGEIN  | NSCPRTYVDGI    |
| <b>TaCelsr</b>   | KTSEI                                   | STDG     | -----    | -----    | -----    | GYGCRVVR | GACPRS FSGGL   |
| <b>OcFmi</b>     | GYAGLD                                  | -----    | EKGCREVT | QVEGSL   | LLLTNEVY | WSSLGDR  | TSSQFMILAGALS  |
| <b>OlFmi</b>     | GYAGLD                                  | DDDGGAET | GCKKVTR  | VEGSVILT | SEIYWSSL | LADVSSSQ | FQSLSAALSREMET |
| <b>ScFmi</b>     | DYTGLD                                  | -----    | -----    | -----    | -----    | ADGCHVL  | TRVVAEVSLLGP   |
| <b>AqCelsr3L</b> | GFVFG                                   | PEGPCREG | -----    | -----    | -----    | VLVSGSF  | VIDNLYANGDDT   |

|                  | 2390                                    | 2400   | 2410    | 2420    | 2430  | 2440    | 2450         |
|------------------|-----------------------------------------|--------|---------|---------|-------|---------|--------------|
|                  | .... .... .... .... .... .... .... .... |        |         |         |       |         |              |
| <b>MmCelsr1</b>  | WWPQT                                   | KFGQPA | AVPCPKG | SVGN    | ----- | AVRHCSG | EKG-WLPPEL   |
| <b>DrCelsr1b</b> | WWPRT                                   | TMFGG  | PAATNCP | KGSSGT  | ----- | AIRHCS  | DDEKG-WFPSEL |
| <b>DrCelsr1a</b> | WWPRT                                   | NFGFPV | AMNCPKG | SIGT    | ----- | AVRHCD  | EDEKG-WLPPEL |
| <b>MmCelsr2</b>  | WWPRT                                   | RFGLP  | AAAPCPK | SFGT    | ----- | AVRHCD  | EHRG-WLPPNL  |
| <b>DrCelsr2</b>  | WWPRT                                   | KFGLP  | AAVACPK | SIGT    | ----- | AIRHCD  | EHRG-WLSANL  |
| <b>MmCelsr3</b>  | WWPQT                                   | KFGVL  | ATVPCPR | GALGA   | ----- | AVRLCD  | EDEQG-WLEPDL |
| <b>DrCelsr3</b>  | WWPRT                                   | KFNLP  | AAVPCPK | SVGT    | ----- | AIRHCD  | GERG-WLDPDL  |
| <b>DmStan</b>    | WWPRT                                   | PLGGV  | AIEGCP  | PPARGK  | ----- | GORSCD  | VQSGSWNT     |
| <b>ChFmi</b>     | WWRAA                                   | RGVTR  | QRERC   | PFNAVGN | ----- | ATRHCD  | PRKG-WQPPDF  |
| <b>TaCelsr</b>   | WWNRS                                   | RFNATI | TMDCPN  | GASGK   | ----- | ASRVCD  | NESTS-WQPPDT |
| <b>OcFmi</b>     | TAFQRA                                  | AAGERV | LAFFTVI | SYTD    | ----- | DIGGAS  | VNELLWVLDV   |
| <b>OlFmi</b>     | SSFRA                                   | HGEQV  | FVSFSI  | ISYSD   | ----- | GIDEAT  | VNELLWVLYA   |
| <b>ScFmi</b>     | STSQA                                   | LRTESQ | QTRTEI  | IAYLIER | FFVGF | PGSQHV  | TVTSLSIVPG   |
| <b>AqCelsr3L</b> | LPTTLE                                  | LNLNLS | SNNYNV  | TAVMYN  | ----- | LVSDSK  | AGLISTHE     |

|                  | 2460                                    | 2470   | 2480    | 2490   | 2500   | 2510   | 2520     |
|------------------|-----------------------------------------|--------|---------|--------|--------|--------|----------|
|                  | .... .... .... .... .... .... .... .... |        |         |        |        |        |          |
| <b>MmCelsr1</b>  | -----                                   | -----  | CTSGSF  | VDL    | KALNEK | LNRNET | RM       |
| <b>DrCelsr1b</b> | -----                                   | -----  | CTSLSF  | SKL    | KKASED | LYANAS | RMDGERSR |
| <b>DrCelsr1a</b> | -----                                   | -----  | CTTITF  | SHL    | KKMNDD | LHRNES | SMDGQKSR |
| <b>MmCelsr2</b>  | -----                                   | -----  | CTSVTF  | SEL    | KGFAER | LQRNES | GLDSGRS  |
| <b>DrCelsr2</b>  | -----                                   | -----  | CTSVSF  | SKL    | KTLSER | LVRNAS | LMDSTNV  |
| <b>MmCelsr3</b>  | -----                                   | -----  | CTSPAF  | RELS   | LLLLD  | GLELNK | TALD     |
| <b>DrCelsr3</b>  | -----                                   | -----  | CTSPPF  | VELN   | TALES  | LERNET | ELNTI    |
| <b>DmStan</b>    | -----                                   | -----  | CTSEPF  | VELR   | RQLSQ  | LEKLEL | NSFVA    |
| <b>ChFmi</b>     | -----                                   | -----  | CTSOLF  | SNIQ   | TLLKPV | LTS    | SGKRM    |
| <b>TaCelsr</b>   | -----                                   | -----  | CTSRVY  | LRLQ   | SQFDG  | -YKQN  | PFTTGL   |
| <b>OcFmi</b>     | CSSDPC                                  | FPGSTC | SPVPM   | TAAGRV | QSFTCS | SCPGPF | AGDGI    |
| <b>OlFmi</b>     | CSSSPC                                  | FLTST  | CS----- | DSASRN | FSCSS  | CPGPSF | SGNGI    |
| <b>ScFmi</b>     | -----                                   | -----  | -----   | RTAKE  | GATPRL | QVNF   | AVRSHAY  |
| <b>AqCelsr3L</b> | -----                                   | -----  | -----   | RDCI   | GRYE   | IRKNSH | DFNADCS  |



|                  | 2530                                                                   | 2540  | 2550  | 2560  | 2570  | 2580  | 2590               |
|------------------|------------------------------------------------------------------------|-------|-------|-------|-------|-------|--------------------|
| <b>MmCelsr1</b>  | GNS                                                                    | ----- | ----- | ----- | ----- | ----- | TLFGNDVRTAYQLL     |
| <b>DrCelsr1b</b> | HTY                                                                    | ----- | ----- | ----- | ----- | ----- | RFLGNDVRTAYHLL     |
| <b>DrCelsr1a</b> | QTS                                                                    | ----- | ----- | ----- | ----- | ----- | SFYGNDIKTTYHLL     |
| <b>MmCelsr2</b>  | HTS                                                                    | ----- | ----- | ----- | ----- | ----- | GYFGSDVKVAYQLA     |
| <b>DrCelsr2</b>  | NTR                                                                    | ----- | ----- | ----- | ----- | ----- | EFYGSVDKIAFHLL     |
| <b>MmCelsr3</b>  | QTD                                                                    | ----- | ----- | ----- | ----- | ----- | HYFSQDVRVTARLL     |
| <b>DrCelsr3</b>  | ATS                                                                    | ----- | ----- | ----- | ----- | ----- | RLYGNDLQIAERLL     |
| <b>DmStan</b>    | AVDRRGASKDQKISGNGRPNRRYKMESSFLLSNGGNVWSHELEMDYLSDELKFTHDRLYGADLLVTEGLL |       |       |       |       |       |                    |
| <b>ChFmi</b>     | APKLTFTP                                                               | ----- | ----- | ----- | ----- | ----- | HAFYKGDIMIGYDAL    |
| <b>TaCelsr</b>   | GLS                                                                    | ----- | ----- | ----- | ----- | ----- | FEHDINICLDVV       |
| <b>OcFmi</b>     | CVYEFNPQQSSCQ                                                          | ----- | ----- | ----- | ----- | ----- | LVGTASRRCKGAGWAE   |
| <b>OlFmi</b>     | CPYVFNPPQDQCRQDDDSASCPTMSDDVYWPRTLSSGRKSSRPCPAG                        | ----- | ----- | ----- | ----- | ----- | LVGVATRSCRNGEWQK   |
| <b>ScFmi</b>     | HSNMLEQYRIVPG                                                          | ----- | ----- | ----- | ----- | ----- | FLQFQANCSDHPCYPDVQ |
| <b>AqCelsr3L</b> | GSYLDDP                                                                | ----- | ----- | ----- | ----- | ----- | IICRSSLPQGCGLDTD   |

|                  | 2600                                                                     | 2610 | 2620 | 2630 | 2640 | 2650 | 2660                 |
|------------------|--------------------------------------------------------------------------|------|------|------|------|------|----------------------|
| <b>MmCelsr1</b>  | ARILQHESRQQGFDLAATREANFHEDVVHTGSALLAPATEASWEQIQ                          | ---- | ---- | ---- | ---- | ---- | RSEAGAAQLLRHFEAYFSN  |
| <b>DrCelsr1b</b> | ASVLEHESLQQGFELTATHDTDFNRNIIKAGSAILDPLNQEHWEKIQ                          | ---- | ---- | ---- | ---- | ---- | RSDGGTANLLHQFEEYANT  |
| <b>DrCelsr1a</b> | SSIILRYESQQGFNLAAMRDAKFNENLVKAGSAILDASNKEHWDQIQ                          | ---- | ---- | ---- | ---- | ---- | RTEGGTANLLKHFEYANT   |
| <b>MmCelsr2</b>  | TRLLAHESAQRGFGLSATQDVHFTENLLRVGSALLDAANKRHWEIQ                           | ---- | ---- | ---- | ---- | ---- | QTEGGTAWLLQHYEAYASA  |
| <b>DrCelsr2</b>  | RAILRHESQQGFNLTATQDVLFNELMHVGSAILRAETRGRHWQTIQ                           | ---- | ---- | ---- | ---- | ---- | QTESGTDTLRQFEEYHTT   |
| <b>MmCelsr3</b>  | AYLLAFESHQQGFGLTATQDAHFNENLLWAGSALLAPETGHLWAALGQRAPGGSPGSAGLVQHLEEYAAT   |      |      |      |      |      |                      |
| <b>DrCelsr3</b>  | SRLITFESLQSGFGLTATQDAHFNENLVLRGCSVLLGPASASLWRAQ                          | ---- | ---- | ---- | ---- | ---- | SSGQSGAAGLADLLEQYTRI |
| <b>DmStan</b>    | QELINYEMLQSGNLNLSHSQDKYFIKNLVDAASVILDRKYEAEWRRAT                         | ---- | ---- | ---- | ---- | ---- | ELIQRGPDDLVDANFKYLVV |
| <b>ChFmi</b>     | RLMISYEGNQTLADHLVSADEEQFVGNLLKSAGKLFQTSLSPFWDSIQKKYSGTAGLMEKERVNLSKN     |      |      |      |      |      |                      |
| <b>TaCelsr</b>   | NNALSYGRQLLGRSNQRANTNEVNTITEKSFNAISELLSRNNLDKWS                          | ---- | ---- | ---- | ---- | ---- | KKSNRSSTLLSSVNDYNTD  |
| <b>OcFmi</b>     | PSLVDCVSDEVAQLLALALYEELEQGVFLESDAIATVVEQLKEITSSPSAENSNIESAIRIVMGVIQYETDA |      |      |      |      |      |                      |
| <b>OlFmi</b>     | TSLVECVSDDVERLLSLYEELERGVLESEAIAMVEQLRDIADSSSDNSNIEAAIRVAMGVIQYETDT      |      |      |      |      |      |                      |
| <b>ScFmi</b>     | CQQINATVVSCGSCPVGFIGDGIQCRKDMAGCSSIKNVSEMQYSSIDKDYDGVLDSCDNCWPVYNPDQSA   |      |      |      |      |      |                      |
| <b>AqCelsr3L</b> | QDGFDPDACDSCPYWFNPRQDYTLPCSETSTESCPREKAGDVLWSQTDKGRVDSRECPPLIGIATRQCSS   |      |      |      |      |      |                      |

|                  | 2670                                                                    | 2680  | 2690  | 2700  | 2710  | 2720  | 2730                           |
|------------------|-------------------------------------------------------------------------|-------|-------|-------|-------|-------|--------------------------------|
| <b>MmCelsr1</b>  | VARNVKRTYLRPFVIVTANMILAVDIFDKLNFTG                                      | ----- | ----- | ----- | ----- | ----- | AQVPRFED--IQEELPRELESSVSFPADT  |
| <b>DrCelsr1b</b> | LVQNVKRTYLRPFTIITDNIIVALDFLDSTASQ                                       | ----- | ----- | ----- | ----- | ----- | EKI PRFQE--VKEVFSKEMECSVLFPNL- |
| <b>DrCelsr1a</b> | LAQNMKRTYLRPFIVTENMVFAVDYLVTPDA                                         | ----- | ----- | ----- | ----- | ----- | TKVNFQT--TDQECPKDLKSSVLFPEFS   |
| <b>MmCelsr2</b>  | LAQNMRRHTYLRPFTIVTPNIVISVVRLDKGNFAG                                     | ----- | ----- | ----- | ----- | ----- | TKLPRYEA--LRGERPPDVETTVILPESV  |
| <b>DrCelsr2</b>  | LAQNMRRTYLRNPFTIVTPSIVISIDRLEKMNFAFAG                                   | ----- | ----- | ----- | ----- | ----- | AKLPRYQS--LRGPRPLDLETAVTLPDSV  |
| <b>MmCelsr3</b>  | LARNMELTYLRNPVGLVTPNIMLSIDRMEHPSSTQGA                                   | ----  | ----  | ----  | ----  | ----  | RRYPRYHSNLFQDAWDPHTHVLLPSQA    |
| <b>DrCelsr3</b>  | LAQNMKQTYLRNPVALVAPNIVMTLDRVDNHTHVR                                     | ----  | ----  | ----  | ----  | ----  | RRFPRYHSPLFRGQALWDAHTHVLPAA    |
| <b>DmStan</b>    | LARSQHDYTSFPFIVQPNMALGLDIVTTESLFGYE                                     | ----  | ----  | ----  | ----  | ----  | PEQLSEYHRSKYLPNAFTTESVVLPTSG   |
| <b>ChFmi</b>     | LAYIKRNRNRRSVTLNNTYSQATSNIYFEIKPMVR                                     | ----- | ----- | ----- | ----- | ----- | GNSVDEEKFITLPLDSL              |
| <b>TaCelsr</b>   | LKAYIKDKSINNAITYPNVMMRIEELIVSQYNG                                       | ----- | ----- | ----- | ----- | ----- | LTLPSPS                        |
| <b>OcFmi</b>     | VSQVVNSQYEGQEKLFKSLLEVISNVLMEEDNAYSWEIRKNGSLPGAASLMQKIESMAAAAASATDLVSSA |       |       |       |       |       |                                |
| <b>OlFmi</b>     | VLQIENSRYATQEKLLTSLLEVISNVLMESSAYAWRRIQENGSLPGAASMMKSVEAMAVAASGTELVSSL  |       |       |       |       |       |                                |
| <b>ScFmi</b>     | LLCSNAKSARCPAGLETLPHTVVRWTRGRPDHTLQQLCPGTSVGNMTRTCTEHGWQASNRSACQSLPIAA  |       |       |       |       |       |                                |
| <b>AqCelsr3L</b> | DGMWLEPNFNMCMTFTGVQLNSILQDLTGEPSPDQNETIAVSIKLESVLSSSPRLYCRDLDSAVFILAKI  |       |       |       |       |       |                                |

```

                2740      2750      2760      2770      2780      2790      2800
      . . . . | . . . . | . . . . | . . . . | . . . . | . . . . | . . . . |
MmCelsr1  FKPPEKKEGPPVRLTNRRTTPLT-----AQP--EPRAERETSSSRRRRHPDEPGQFAV
DrCelsr1b  LMSKSKDALSTDPQSINSTVS-----VMSMDGSDVVDLIPSIKKRSHAEQDPPAA
DrCelsr1a  FKSSEHKVSPTDDPEFQIN-----SDEEEKQATNKRKRHVETIPFPFV
MmCelsr2  FREMP---SMVRSAGPGEA-----QTEELARRQRRHPELSQGEAV
DrCelsr2  FSPAPEGKGRHHSEPIIE-----PGRNHTANRKRHRPDERQEDAI
MmCelsr3  SQPSPSEVLPTSSN-AENAT-----ASSVVSPPAPLEPE--SEPGISI
DrCelsr3  LVPQRNVFSAPSPAGPVNLL-----ANQTLAATAARRSLSLQEAPVSI
DmStan    FLQHSARQRPVIFSFKYNNYILDRRKF-----DQHTKVLVPLEMLGITPPESDEISQSGRRGSSHDHRAI
ChFmi    SPRHIDYYMWKDPSPVSVRIS-----DAIFLDHDELFRINEVN
TaCelsr   DSGSVSNITDRISLPNDLVK-----KGSSDESVP
OcFmi    RGNQITWAASHIALHMVSFSDRPPSSD-----VIFPVNDFAFRPIGPFQFKEGTAVSLPADIFPSSGTNG
OlFmi    PGGEITWAASHIALHLVSMNDRRRS-----FVFPSAIVALQPLG--LLKRGTGVLSADNFP--LAKG
ScFmi    LMNEFESLEAGHIFSAAEASQWMLR-----LQTAVRKATHSSSGSTPVVSDHT
AqCelsr3L LNLDTLLPLTSSGLKPLAEVLGLLGSKLAEVWEETGCNAGIILNLTEHLGVLSASSLSIGESLTVEGDG

```

```

                2810      2820      2830      2840      2850      2860      2870
      . . . . | . . . . | . . . . | . . . . | . . . . | . . . . | . . . . |
MmCelsr1  ALVVIYRTLGLQLLP-EHYDP-----DHRSLRPNRNPVINTPVVSA
DrCelsr1b  VMVMIYRSLGHLIP-ESYDP-----DRRSLRPNRNPVINTPIVSV
DrCelsr1a  ASVIIYKTLGQFLIP-EHYDP-----DRRSLRPNRNPVINTPIVSA
MmCelsr2  ASVIIYHTLAGLLP-HNYDP-----DKRSLRVPKRPVINTPAVSI
DrCelsr2  ASIIIFHTLATLLP-ERYDT-----DKRSLRVPKRPVINTPVVSI
MmCelsr3  VILLVYRALGGLLP-AQFQA-----ERRGARLPQNPVMNSPVVSV
DrCelsr3  VIIIIYRSLGAALP-PKYHT-----DRRGVRLPRHPVLNSPVVSI
DmStan    VAYAQYKDVGQLLP-DLYDETTTRRWGVDVELATPILSLQILVPSMEREQETQRLEIPSRKIFSSSSPSS
ChFmi    IGLIIYKTLGHLIP-TNFDQ-----DNREEGRKYALNVYSDVVTL
TaCelsr   IVYLKFDTIQQLIP-GKSDVVAP-----YDIMVTSTVLSCVVG
OcFmi    VAFVYNTLHKILS-NSFEA-----LGNNSGSKWSIASHIISV
OlFmi    VAFVAYNTLHKVLP-SLFDS-----LGNTYGSWFVNSPIISV
ScFmi    AATLPYPGDVKVYVY-HILNMLQYG-----TSLMMSNLETLSDFIST
AqCelsr3L LSMSVSAYNGRVYSGYEFNVNGSTATGVSVPNGVIPLADNDNFSISLTHYSDLSSLPYTDLSPDAIVGS

```

```

                2880      2890      2900      2910      2920      2930      2940
      . . . . | . . . . | . . . . | . . . . | . . . . | . . . . | . . . . |
MmCelsr1  MVYSE-----
DrCelsr1b  VVHKD-----
DrCelsr1a  TVYSE-----
MmCelsr2  SVHDD-----
DrCelsr2  TVHDN-----
MmCelsr3  AVFHG-----
DrCelsr3  SVYNN-----
DmStan    SSSSGSTEQQFVEVFDVPKAPTSSSEQQIEDIRITAHEIPPPVSSVEQQEASSDEDEGEEREPIRLNLDD
ChFmi    TIP-----
TaCelsr   D-----
OcFmi    GMSDS-----
OlFmi    GVSGS-----
ScFmi    SLDVAD-----
AqCelsr3L PVWSIQLLMN-----

```

```

                2950      2960      2970      2980      2990      3000      3010
                ....|....|....|....|....|....|....|....|....|....|....|....|....|
MmCelsr1 -----
DrCelsr1b -----
DrCelsr1a -----
MmCelsr2 -----
DrCelsr2 -----
MmCelsr3 -----
DrCelsr3 -----
DmStan      IEFHGNSGEEVISPDSPPEMLNPNYEGVSSTGSDEQPKGENEAAYRDRRLVKRQVEITYPSEQMQQTEQV
ChFmi -----
TaCelsr -----
OcFmi -----
OlFmi -----
ScFmi -----
AqCelsr3L -----

```

```

                3020      3030      3040      3050      3060      3070      3080
                ....|....|....|....|....|....|....|....|....|....|....|....|
MmCelsr1 -----GTPLPSSLQRPILVEFSLLETEE-----RSKPVCVFNHSLDTGGTGGWSA
DrCelsr1b -----GEPLLSPLQRPILLNFRLLLETQE-----RTKPVCVYWNHSIMVAGGGAWSS
DrCelsr1a -----GQPLHIPLERPITLDYNLLETEE-----RTKPVCVFNHHSITVGGAGAWSS
MmCelsr2 -----EELLPRALDKPVTVQFRLLETEE-----RTKPICVFNHHSILVSGTGGWSA
DrCelsr2 -----EELLQHTLDKPIIVQFRLVTTTEE-----RSKPICVFNHHSIVAASPGGWSS
MmCelsr3 -----RNFLRGVLVSPINLEFRLLOTAN-----RSKAICVQWDPPGPTDQHGMWTA
DrCelsr3 -----QTFVEGFLESPVLLFRLLETSN-----RSKPICVQWNHSSIVSGGGCWTV
DmStan      YRSLGSPHLAQPIKLMQWLDVDSARFGP-----RSNPQCVRWNSFTNQWTRLGCQT
ChFmi -----SIKSLHPLTEIQITYKNVSQLNS-----TSTSLVCAFWNYSLSGTVSGGWSP
TaCelsr -----TSSLSSPITLTLTSLNKKVSN-----VQAHECVYWKDLKLTGGRWST
OcFmi -----NINTSFLAAPVNLTFSHNQPLN-----ESSTECSEFWKFDKGLGGSWST
OlFmi -----NLNTTKLAFPNLTFVHTQVLHRVRITYSNILAVFLRKELNRSSECGFWNFKDKQNPESGWST
ScFmi -----VLFSGKQKAAWKLMDVSHQSTVAG-----LMVQLESFMSMAHALSVAGDDAGVA
AqCelsr3L -----GGRVTQLATPINITFPHPIEVNS-----SLTSLCVTWN-----ATRNKIVE

```

```

                3090      3100      3110      3120      3130      3140      3150
                ....|....|....|....|....|....|....|....|....|....|....|....|
MmCelsr1 KG-----CELLSRNRTHVTCQCSHSASCAVLMDISRRE--HGEVLPLKIITYAA-----LSLSLV
DrCelsr1b KG-----CELVFRNSTHISCQCSHMSSFAVLMDISKRE--HGDVLPLKVVTYTT-----VSASLV
DrCelsr1a KG-----CDIISRNHTHISCQCNHMTSFVLMDISKRE--HGDVLPLKIVTYTT-----VSASLL
MmCelsr2 RG-----CEVFRNESHVSCQCNHMTSFVLMDSRRE--NGEILPLKTLTYVA-----LGVTLA
DrCelsr2 KG-----CEVFRNSTHISCQCYHMTSFVLMDISRRE--NGEILPVKLVTWSS-----VGATLF
MmCelsr3 RD-----CELVHRNGSHARCRCRSRTGTFGVLM DASPRERLEGDLELLAVFTHVV-----VAVSVT
DrCelsr3 RD-----CSVLYRNTSHVRCQCHRLGTFGVLM DSSQREQLEGDLETLAIVTYSS-----LSVSMA
DmStan      EIPDFDGDENPAAQAILVNCSCHTHISSYAVIVDVIDPEDIPEPSLLVQITSYSA-----FLVSLP
ChFmi      NG-----CVTKMEVNSSDVTVCVNRMASFALVGFQYTEI--IPRVYQPAFLVYIA-----LAVAML
TaCelsr      DG-----CSLISRDSSTKTVCCCNHLTDFGVLSRYRSKPLPSVTPIKLELVTYIG-----IGISLL
OcFmi      EG-----CTTVFSNSTQTTCCCHHLTSFGVAADD-----KSGLIDLNLFVIIS-----CCFTIG
OlFmi      SG-----CSAISTTSTSTTCCDHLTSAVLSAD-----KSGSIDLDFVIIG-----CCFTIG
ScFmi      RQS---HVLENMYVEYGMMSNGSSTFPTSSMSSNLSEFSISSNVPSGYAAFLQFD-----DAADLM
AqCelsr3L SG-----CQATVNNPNSTSCSAPHLSDFTVLIVPYEEVFVCLVLYTILHLIRASKDQSHIQNRVNATLF

```

|                  | 3160                                                             | 3170            | 3180   | 3190       | 3200      | 3210   | 3220      |
|------------------|------------------------------------------------------------------|-----------------|--------|------------|-----------|--------|-----------|
|                  | .... .... .... .... .... .... .... .... .... .... .... .... .... |                 |        |            |           |        |           |
| <b>MmCelsr1</b>  | ALLVAFVLLSLVRTLRSLNLSIHKNLITALFFSQLI                             | FMVGIN----      | QTENPF | LC         | TVVAILLH  | YVSMGT | FA        |
| <b>DrCelsr1b</b> | ALLITFLLLAAILRKLRSNLHSIHKNLVASIFLSEFIF                           | ELTGIN----      | QTDSPF | VC         | TVVAILLH  | YSYMCA | FA        |
| <b>DrCelsr1a</b> | ALFITFILLAILHLKLRSLNLSIHKNLVAAALFFSELV                           | ELIGIN----      | QTDNPF | VC         | TVIAILLH  | YFYMCT | FA        |
| <b>MmCelsr2</b>  | ALMLTFLFLLRRLRALRSNQHGIRRNLTAAALGLAQ                             | IVELLGIN----    | QADLPF | ACTVIAILLH | FLYLCT    | FS     |           |
| <b>DrCelsr2</b>  | FLLLTIIIFLSCLRRAANSNKTSIAKNGSSALFIAL                             | LVFELGIS----    | QADNPF | VC         | TLMAILLH  | FFWLCV | FS        |
| <b>MmCelsr3</b>  | ALVLTAAVLLSLRSLKSNVRGIHANVAAALGVAEL                              | LELLGIH----     | RTHNQL | LL         | CTAVAILLH | YFFLST | FA        |
| <b>DrCelsr3</b>  | ALLLTVLVLSCLRGLKSNTRSISHSNMAAATLLSH                              | LTYLLGIN----    | QTEQQF | LC         | TVVAILLH  | YFFMSA | FA        |
| <b>DmStan</b>    | LLLGVLALALLRGGQQTNSNTIHQNIIVLCVFC                                | AELEFVGMQSRRL   | LESEFP | CK         | LTAICLH   | YFWLAA | FA        |
| <b>ChFmi</b>     | LFLIVFLVFLCLSQLKSNANSIHKNLAFVLLLGW                               | IVFETFAIN---    | RPDVGK | AN         | CRIIAILLH | YCLTCA | FS        |
| <b>TaCelsr</b>   | LLVSVFLCLTVMRSVNGSTNTIHCHILINLILV                                | ESLEFLIGIT----  | QTASTM | IC         | IAISTLLH  | FFLLV  | VFS       |
| <b>OcFmi</b>     | CLVILTLASCCSRKASSDRMLVLLNLDLAIVM                                 | SELEFVIGIG----  | QENSDT | CT         | AMAVILLH  | FFCAA  | IFS       |
| <b>OlFmi</b>     | CLTVLLLVLYCSRKSNQDRIVVFANFDLAML                                  | FTELEFVIGIG---- | QEKAGV | CV         | AMAVILLH  | FFCTAV | FA        |
| <b>ScFmi</b>     | NARVVKSAGEIASEWYLN SAVVMARFQATG                                  | SVPTSGENGTVS--- | FQLRRR | NT         | AASGEA    | ICAFWN | PQLQQ     |
| <b>AqCelsr3L</b> | LVFLFIFIVINLSFTMLTLHSIQWSPPFSTV                                  | FSLIVILSVVTS--  | AVLIFT | VI         | LC        | TKRPKI | FKLNIESGS |

|                  | 3230                                                             | 3240           | 3250                | 3260             | 3270     | 3280   | 3290          |             |
|------------------|------------------------------------------------------------------|----------------|---------------------|------------------|----------|--------|---------------|-------------|
|                  | .... .... .... .... .... .... .... .... .... .... .... .... .... |                |                     |                  |          |        |               |             |
| <b>MmCelsr1</b>  | WTLVENLHVYRMLTEVRNIDTGP                                          | MRFYHVVGWGI    | PAIVTGLAVG-----     | LD               | PQGY     | GNPDFC | WLSLQD-T      |             |
| <b>DrCelsr1b</b> | WMFVEGLHIYRMLTEMRNINQGH                                          | MRFYAICWGI     | PAITGLAVG-----      | LD               | PQGY     | GNPDFC | WLSVYD-T      |             |
| <b>DrCelsr1a</b> | WTFVEGLHIYRMLTEVRNINHG                                           | MRFYAICWGI     | PAITGLAVG-----      | LD               | PQGY     | GNPDFC | WLSVHD-T      |             |
| <b>MmCelsr2</b>  | WALLEALHLYRALTEVRD                                               | VNASPMRFYMLC   | WCVPAFITGLAVG-----  | LD               | PEGY     | GNPDFC | WLSVYD-T      |             |
| <b>DrCelsr2</b>  | WLFLEGLHVYRMLSEL                                                 | RDINYGPMRFYLI  | CWCVPAFITGLAVG----- | LD               | PEGY     | GNPDFC | WLSLYD-T      |             |
| <b>MmCelsr3</b>  | WLLVQGLHLYRMQVEPRN                                               | VDRGAMRFYHALC  | WCVPAVLLGLAVG-----  | LD               | PEGY     | GNPDFC | WISIEHE-P     |             |
| <b>DrCelsr3</b>  | WLFVEALHIYRMQTEARN                                               | NINYGAMRFYATC  | WCVPAITGLAVG-----   | LD               | PEGY     | GNPDFC | WISMYD-K      |             |
| <b>DmStan</b>    | WTTVDCVHLYRMLTEMR                                                | DINHGPMGFYFAMC | YCAPAIVVGLSVG-----  | VRA              | HEY      | GN     | SLEFCWLSVYE-P |             |
| <b>ChFmi</b>     | WLMVEALHMYRMILEPR                                                | DINYGQMMFYFIC  | WGAIVVGVGTAG-----   | LK               | PDGY     | GTPEFC | WISAKVND      |             |
| <b>TaCelsr</b>   | WICIESIYMYRKLK                                                   | ETKTKTKCHLLF   | CCLPGYCI            | PAAIATATTA-----  | ISLSY    | HNKRYC | WLSVEH-G      |             |
| <b>OcFmi</b>     | WVVVEILGIYYLAA-V                                                 | KNAEKTKIPYYL   | GVGWLPA             | LITVITVG-----    | IRL      | DAYK   | GN            | SYCFLTLKE-S |
| <b>OlFmi</b>     | WVVVEILNVYYIVS-A                                                 | KDSEKTKIPYYL   | GVGWFPA             | LIVAITVG-----    | IRLN     | AYEG   | NLYCFLTLDD-D  |             |
| <b>ScFmi</b>     | WSDSGCSMTAATV                                                    | THITCVCNHMTAF  | GVLERAA             | LPVTRLTMHVL----- | ATAS     | CAVS   | AVLFLVILAL-V  |             |
| <b>AqCelsr3L</b> | SEAAKEFQQYSNNSS                                                  | CIEDENTQPIYHT  | IGNRTEELYQEP        | VPPVPPINQLN      | PGFQASSI | PEYHE  | LEQQGDG       |             |

|                  | 3300                                                             | 3310                   | 3320       | 3330           | 3340    | 3350 | 3360 |             |     |             |             |             |            |     |      |    |    |    |    |    |    |     |   |   |   |   |   |   |    |    |    |    |   |    |   |   |   |   |   |   |   |   |   |
|------------------|------------------------------------------------------------------|------------------------|------------|----------------|---------|------|------|-------------|-----|-------------|-------------|-------------|------------|-----|------|----|----|----|----|----|----|-----|---|---|---|---|---|---|----|----|----|----|---|----|---|---|---|---|---|---|---|---|---|
|                  | .... .... .... .... .... .... .... .... .... .... .... .... .... |                        |            |                |         |      |      |             |     |             |             |             |            |     |      |    |    |    |    |    |    |     |   |   |   |   |   |   |    |    |    |    |   |    |   |   |   |   |   |   |   |   |   |
| <b>MmCelsr1</b>  | LIWSFAGPVGTVIIINTVIFVL                                           | SAKVSCQRKHYYERK-----   | GVVSM      | LR             | TAFLL   | LL   | LV   | TATWLLGLLAV |     |             |             |             |            |     |      |    |    |    |    |    |    |     |   |   |   |   |   |   |    |    |    |    |   |    |   |   |   |   |   |   |   |   |   |
| <b>DrCelsr1b</b> | LIWSITGPISIVVLINIVL                                              | VLAAKASCRRQR-TEKS----- | GAI        | SAL            | RVAFL   | LL   | LI   | SATWLLGLMAV |     |             |             |             |            |     |      |    |    |    |    |    |    |     |   |   |   |   |   |   |    |    |    |    |   |    |   |   |   |   |   |   |   |   |   |
| <b>DrCelsr1a</b> | LIWSFAGPIAVVVLVNI                                                | VIFVMAAKASCRRQRSY      | EKS-----   | GVP            | AL      | RM   | AF   | LL          | LI  | SATWLLGLMAV |             |             |            |     |      |    |    |    |    |    |    |     |   |   |   |   |   |   |    |    |    |    |   |    |   |   |   |   |   |   |   |   |   |
| <b>MmCelsr2</b>  | LIWSFAGPVAFVAVS                                                  | MSVFLYILSARASCAA       | QRQGF      | EKK-----       | GPV     | SGL  | RSS  | FTV         | LL  | LI          | SATWLLALLSV |             |            |     |      |    |    |    |    |    |    |     |   |   |   |   |   |   |    |    |    |    |   |    |   |   |   |   |   |   |   |   |   |
| <b>DrCelsr2</b>  | LIWSFAGPIAFVVM                                                   | NLFLYIMASRASCS         | LRQKSCE    | KRD----        | VPA     | AG   | LR   | TACTV       | LF  | LV          | TV          | TCLLALLSV   |            |     |      |    |    |    |    |    |    |     |   |   |   |   |   |   |    |    |    |    |   |    |   |   |   |   |   |   |   |   |   |
| <b>MmCelsr3</b>  | LIWSFAGPIVLVIVM                                                  | NGTMFLLAARTSC          | STGQRE     | AKKT-----      | SVL     | -    | TL   | RSS         | FLL | LL          | VS          | SASWLFGLLAV |            |     |      |    |    |    |    |    |    |     |   |   |   |   |   |   |    |    |    |    |   |    |   |   |   |   |   |   |   |   |   |
| <b>DrCelsr3</b>  | LMWSFAGPVSVVIL                                                   | MNGMFLMVL              | RMTCNP     | TQKEIKKL-----  | PV      | I    | ST   | IR          | SA  | FF          | LL          | ST          | CVWLFGLMAV |     |      |    |    |    |    |    |    |     |   |   |   |   |   |   |    |    |    |    |   |    |   |   |   |   |   |   |   |   |   |
| <b>DmStan</b>    | VVWVWLVGPIAGMS                                                   | VVNLLILFVSVKAA         | FTLKD      | HVLGFG-----    | NLR     | T    | LL   | WLS         | VVS | LP          | LM          | GM          | VWVLA      | VLA |      |    |    |    |    |    |    |     |   |   |   |   |   |   |    |    |    |    |   |    |   |   |   |   |   |   |   |   |   |
| <b>ChFmi</b>     | SVWTVYVAPIFAII                                                   | AGTFIIII               | LALASS     | CEKANIKGKKAK-- | LARI    | RY   | RL   | AI          | SFF | FL          | FI          | MM          | VT         | VFG | GLLE |    |    |    |    |    |    |     |   |   |   |   |   |   |    |    |    |    |   |    |   |   |   |   |   |   |   |   |   |
| <b>TaCelsr</b>   | LIWSLGC                                                          | PAACIIIGISLV           | FFCLTYHKIR | FRSNSMTRWNR    | KEIDSDK | F    | DL   | R           | SG  | ML          | LI          | LF          | IT         | AA  | VFG  | VI |    |    |    |    |    |     |   |   |   |   |   |   |    |    |    |    |   |    |   |   |   |   |   |   |   |   |   |
| <b>OcFmi</b>     | DVWAFSGLAVLSIA                                                   | AFFIVFAMI              | FDSR       | KKLKKKLS       | PDDDQ-L | PS   | V    | K           | M   | P           | V           | V           | C          | S   | CL   | LI | LF | LV | TL | VF | GR | FYL |   |   |   |   |   |   |    |    |    |    |   |    |   |   |   |   |   |   |   |   |   |
| <b>OlFmi</b>     | VIWAFGVAVLAI                                                     | AFFIIF                 | CFMIF      | DGQK           | KL      | R    | K    | R           | S   | D           | A           | D           | E          | K   | -    | L  | P  | S  | I  | K  | L  | P   | L | V | G | S | V | L | TL | LI | TL | LV | L | FA | I | G | F | Y | L |   |   |   |   |
| <b>ScFmi</b>     | IAYRKRSPAM                                                       | LIVSYFGIA              | AGMFL      | LEV            | VFAVGL  | FS   | W    | D           | L   | S---        | SV          | T           | C          | T   | S    | V  | A  | I  | L  | Q  | Y  | L   | L | L | L | A | V | A | C  | N  | V  | F  | L | L  | F | L |   |   |   |   |   |   |   |
| <b>AqCelsr3L</b> | SNSDSDSENE                                                       | IDVDVEAL               | QQQ        | TREERE         | I       | R    | R    | R           | E   | S           | N           | R           | I          | S   | A    | R  | L  | E  | E  | E  | K  | R   | R | S | A | G | D | E | N  | I  | S  | S  | I | T  | D | P | Q | Q | E | A | W | F | N |

|                  |                                                                       |                           |                               |         |      |      |      |
|------------------|-----------------------------------------------------------------------|---------------------------|-------------------------------|---------|------|------|------|
|                  | 3370                                                                  | 3380                      | 3390                          | 3400    | 3410 | 3420 | 3430 |
|                  | .... .... .... .... .... .... .... .... .... .... .... .... .... .... |                           |                               |         |      |      |      |
| <b>MmCelsr1</b>  | NSDTLSFHYLFAAFSCLQGI                                                  | FVLLFHCVAHREVRKHLRAVL     | LAGKKLQLDDSATTRATLLTRSLNC     | NNTYS   |      |      |      |
| <b>DrCelsr1b</b> | NSDVLSFHYLFAILSCLQGIC                                                 | IFFFHCIILNKDVRRLKSVFTGKNI | PAEDPSVTRATLLTRSLNG-DVYM      |         |      |      |      |
| <b>DrCelsr1a</b> | NSDVMTFHYLFAIFSCVQGV                                                  | FIFFFHIVFNKEVRKLNKNVFTGKK | QLPDESSTTRTLLTRTLNCNNTYM      |         |      |      |      |
| <b>MmCelsr2</b>  | NSDTLLFHYLFAACNCVQGF                                                  | FIFLSYVVLKSKVRKALKFACSRKP | --SPDPALTTKYTLTSSYNCPSPYA     |         |      |      |      |
| <b>DrCelsr2</b>  | NSDIILFHYLFAAGFSCVQGV                                                 | FIFFLRVVFNQEARDAMRYCCSGK  | ---RPDHMIKSK---PAAFLCSSNYV    |         |      |      |      |
| <b>MmCelsr3</b>  | NHSILAFHYLHAGLCGLQGL                                                  | AVLLLFVNLNADARAAWTPACL    | GKKAPEET-RPAPGPGSGAYNNTALFE   |         |      |      |      |
| <b>DrCelsr3</b>  | NNSVLAFHYLFIILCCIQGL                                                  | AVLLLVFTVLNSEVQEAWLACL    | GKKSPEGEPFRPPQITGQNPYNSALLE   |         |      |      |      |
| <b>DmStan</b>    | SEHSQLLSLLSGVLLHALF                                                   | CLIGYCIINKRVRENLRQTC      | LRMGRKVPLLDSSMVVSNSSHVNAAAR   |         |      |      |      |
| <b>ChFmi</b>     | SFDMTLLTYIFAGTCALEG                                                   | VYMFVCFNRKVRREAYNAYKRY    | STGNKSYGLKPPPKRRGRHFGEKEAL    |         |      |      |      |
| <b>TaCelsr</b>   | QNETVYFQYIFTMVNFIKS                                                   | ACILICYCISNESVRSELSAR     | LCGREGTYYTGTIDKQLNGHRSNGLNGHF |         |      |      |      |
| <b>OcFmi</b>     | INSTSAWSYGFGIINLLL                                                    | LGLVLFITQLLQISKLRKWM      | GESSKSRGQYHVSSAQPTRSILSGS     | FGGDKTN |      |      |      |
| <b>OlFmi</b>     | PRSSSLKYAFGTFNILLG                                                    | FVFLACQILQVSKEVRYIR       | -----HMSVFL-----IVD           |         |      |      |      |
| <b>ScFmi</b>     | RVTVCGACPNKSRSLSPV                                                    | SLVLFVTFVFGYIAPTAVP       | VLCNALLYSHDFGNTYFCWISRHAS     | GDSLWL  |      |      |      |
| <b>AqCelsr3L</b> | TLDPSSLCAPAAPVTYANG                                                   | TQLHADSPISTDAHELADLHNE    | IDNLYQMKSAVLKETVLTADTSS       | GDYVDL  |      |      |      |

|                  |                                                                       |                       |                              |               |       |      |      |
|------------------|-----------------------------------------------------------------------|-----------------------|------------------------------|---------------|-------|------|------|
|                  | 3440                                                                  | 3450                  | 3460                         | 3470          | 3480  | 3490 | 3500 |
|                  | .... .... .... .... .... .... .... .... .... .... .... .... .... .... |                       |                              |               |       |      |      |
| <b>MmCelsr1</b>  | EGPDMLRTALGESTASLD                                                    | STTRDEGVQ-----KLSVSSG | PARGNHGEPDASF                |               |       |      |      |
| <b>DrCelsr1b</b> | EDGGLYRTTIGESSVLSQ                                                    | SSVRSRGKSHGSS-----Y   | LASTFREKKRSISSNGGHVGHDEVDSTL |               |       |      |      |
| <b>DrCelsr1a</b> | EDGALFRSAIGESTVSLE                                                    | STVRDELQ-----KPSVSGN  | -AKAGLTDIDGSL                |               |       |      |      |
| <b>MmCelsr2</b>  | DG-RLY-QPYGDSAGSLH                                                    | SASRSGKSQPS-----Y     | IPFLLREESTLNPQVPPGLGDP       | SG-L          |       |      |      |
| <b>DrCelsr2</b>  | DG-GLYHLPFAESSVSLN                                                    | -GTHSSKTQQN-----Y     | MPFSLRG-NDMNSSHLS--LSE       | QNT-L         |       |      |      |
| <b>MmCelsr3</b>  | ES-GLIRITLGASTVSS                                                     | VSSARSGRAQDQDSQRGRS   | YLRDNVLRVHGSTAEHTERS         | LQAHAGPTDL    | DVAM  |      |      |
| <b>DrCelsr3</b>  | QS-GLHRITLGTSTISS                                                     | VSSAR-----ENLLARQ     | --TLEHTL----AHTGATDL         | DVAM          |       |      |      |
| <b>DmStan</b>    | PSNFLASGYDTTTRRN                                                      | IGISSASTSRSTAKTSS     | -----SPYSDGQLRQTST           | STSNYNSASDAPS | FLRGF |      |      |
| <b>ChFmi</b>     | IGVKNQYAHVFEAFHLD                                                     | STSSNESSDTTDGR-----   | RRARAKFAMSTDFQVHDS           | SSD           |       |      |      |
| <b>TaCelsr</b>   | NGRIDTSRGHGFAGPNAY                                                    | PVARSYDHVDGSNVLG----  | VPDNEAWREFTDAYEKS            | AIATAADGDSVGS | SSEE  |      |      |
| <b>OcFmi</b>     | LSVSFTGTYKSHPYTGN                                                     | PMFSSGPQWDRNVP-----   | DQSYDAMEMDREEDWDEE           | GIAF          |       |      |      |
| <b>OlFmi</b>     | LAYKSHGTVQAYP-VAN                                                     | PMY--GHHWDHGE-----    | QSYDEIDNDREEDWDED            | --AL          |       |      |      |
| <b>ScFmi</b>     | FYVPPAALCTVTFILAM                                                     | LAGASRNATHQAR-----    | WNTVVMIVFCLGFGCA             | FLLL          |       |      |      |
| <b>AqCelsr3L</b> | KDDTPAVNNNWWYEDG                                                      | SSSNHRPRDVTDNMYAN     | -----ATNTSPFDDAQY            | CTVSEARQYTPD  | VPRRF |      |      |

|                  |                                                                       |                     |                     |          |            |                          |      |
|------------------|-----------------------------------------------------------------------|---------------------|---------------------|----------|------------|--------------------------|------|
|                  | 3510                                                                  | 3520                | 3530                | 3540     | 3550       | 3560                     | 3570 |
|                  | .... .... .... .... .... .... .... .... .... .... .... .... .... .... |                     |                     |          |            |                          |      |
| <b>MmCelsr1</b>  | I PRNSKKAHG-----                                                      | PDSDSSELS--LDEHSSSY | ASSHTSDSE---DDGGEA  | EDKWNPA  | GPPAHSTPK  |                          |      |
| <b>DrCelsr1b</b> | FFHKSKKKE-----                                                        | DSDSDSELS--ADEHSSSY | ASSHSSDSE---DEERH   | SKT      | KWNNERTPI  | HSTPK                    |      |
| <b>DrCelsr1a</b> | FRN-GTKAD-----                                                        | DSDSDSELS--VDEHSSSY | ASSHSSDSE---DEDID   | MQPKWNN  | ERQPLHSTPK |                          |      |
| <b>MmCelsr2</b>  | FLEGQAQQHD-----                                                       | PDTSDSDLS-LEDDQSGS  | YASTHSSDSE---EEEEEA | AFPGEQ   | GWDSLLG    | PGA                      |      |
| <b>DrCelsr2</b>  | FKD-KEQMDD-----                                                       | PDSDSDSLSELEDDQSGS  | YASTHSSDSE---EEEE   | -GAFQ-   | EEC        | WENLATS--                |      |
| <b>MmCelsr3</b>  | FHRDAG-----                                                           | ADSDSDLS-LEEERSL    | SIPSESEDN           | GRTRGRF  | QRLRRAA    | QSERLLAHP-               |      |
| <b>DrCelsr3</b>  | FHRNGGTLTHNNLHAC                                                      | EDSDSDLS-LEEERSL    | SIPSESEDN           | VRL-RGRI | QRRFKRT    | GHERLLTEAT               |      |
| <b>DmStan</b>    | ESSTTGRSRGEEKPS                                                       | RQRKSDSGSETDGRSLE   | LASSHSSDDE          | SRTARSS  | GTHRSTAV   | SSTPAYLPN                |      |
| <b>ChFmi</b>     | SSDDSTTTG-----                                                        | PRKRPADSDSDSDNS     | GMEFSTPTTTT         | TGNGST   | PMGGVEW    | KQATSKKLALSRT            |      |
| <b>TaCelsr</b>   | EDVREVLEQNYASTSS                                                      | DDEKGNWKAPSRQASV    | PPNQDGRSAT          | PSGSQV   | DKSQESV    | VHSSKESLHSE              | HP   |
| <b>OcFmi</b>     | HGFPMSQLHR-----                                                       | HRGDGADCVDVAQSE     | SLDLGLRGDES         | VS--EMAP | VVYSQV     | KAHVERDWFEEED            |      |
| <b>OlFmi</b>     | HQFPISQLQR-----                                                       | HQGDGADCVDVMHQD     | GSEEMQLGNESI        | SDDKAS   | YPMADD     | AGVTYDKDWFED             |      |
| <b>ScFmi</b>     | PYFMAEYPQS-----                                                       | RAPVVLFAITNVI       | WSFVLI              | LLVLR    | MHRQ       | NRRYHVKNDFDARPAVQKYTSEPK |      |
| <b>AqCelsr3L</b> | SLQNQAQQYSSIDQL                                                       | PPQPPPMQQFADHTY     | QAIRGQNSPNAS        | PRRTSL   | NLQGR      | QSNDRPVARRLSNQT          |      |

```

          3580      3590      3600      3610      3620      3630      3640
    ....|....|....|....|....|....|....|....|....|....|....|....|....|....|
MmCelsr1  ----ADALANHVVPAGWPDES LAGSDSEELDTEPHLKVETKVSVELHRQAQGNHCGDRPSDPESGV LAKPV
DrCelsr1b ----VDGVSGHGKPYWPEEMPTASESED MVRPEKLRVETKVNVELHQGNKLNHNGLDLSQS--EGPPS---
DrCelsr1a  GTKEVDTVSNHVKPYWPTEAMTASDSED PPGAERLRVETKVNVELHQENKLNHIGESTQD--KEQPTPSI
MmCelsr2  ----ERLPLHSTPKDGGPGSGKVPWLGDFGTTT KENSGSGALEERPRENGDAL TREGLG-----
DrCelsr2  -----GSGKP-----LGVCEGEIRATDETVDKAEDHG----TENLLL-----
MmCelsr3  ----KDVDGNDLLSYWPALGECEAAPCALQAWG---SERRLGLDSNKDAANNNPPELALTS-----GD
DrCelsr3  HNGGKDL DGNLLSYWPALEGCEAH--SLQKWG---SERRLGGDYNKDAANNNPDAALTS-----GD
DmStan    ITEHVQATTPPELVVQSPQLFPF SVNKPVYAPRWSSQLP DAYLQSPPNIGRWSQDTGSDNEHVHGQAKMT
ChFmi    YASDGP MHSTPSESEASERLKWKTGVT PKKSDL SAINSESDISRSEKRPVRKGPTRIS-----
TaCelsr   QVLLRQNQLIPARSSSHVYSTIDETMLEPTSPVSPVSPKNKVI AKGSEKVVVRNNVPTSFSFQEDRINPP
OcFmi    ---VDDIDKPPLDDVVVEEPEDVSSDEIDKRGTR-FQHHRDSAMDT-LRTKGTYLQSP THKS-----SEEK
OlFmi    ---FDN-DKPPL EDVAEEPEEFDL EEIHERSNRGRARYPLSAVDSPARTKGTYLQSPVHKS-----SEEK
ScFmi    ---QSILNPPSALPAAAPLSEQH FVPMPTTNSGSSHSRRSHSSHRTPPP VWYLVEGTS GG--ITASKHS
AqCelsr3L RNPGVSASVQLMNGGSLAPRSVLP SIMTTARVAIRIAIGVLIPLLYLNEATV LARDTTYSSSLTNGTVR

```

```

          3650      3660      3670      3680      3690      3700      3710
    ....|....|....|....|....|....|....|....|....|....|....|....|....|....|
MmCelsr1  AVLS SQPQEQRKGILKNKV TYPPLPEQPLKSR LREKLADCEQSPTSSRTSSLGSGDGVHAT-----
DrCelsr1b  QPNSNQLP--RRGILKNK I TYPPLTDKNMKNLLREKLS DYNPPQISRKTPSPG SNEGLHSGP-----
DrCelsr1a  QANSNHQPEQRKGILKNK I TYPPLTDKNMKNLLREKLS DYNPPTISSRAP SITSN DGGNG-----
MmCelsr2  PLP-GPSTQPHKGILK KKC--LPTISEKSSLLR LP--LEQGTG---SSRGSSISEGSRHGPP-----
DrCelsr2  LLPSLPHTQPHKGILK KKCQ--LSP IAERNA INRIHNQLSGDSA---SSRGSSNEDRGGG-----
MmCelsr3  ETSLGRAQRQRKGILKN RLQYPLVPQ-----SRGTPELSWCRAATLGHRAVPAAS YGRIYAGGGTGSLSQ
DrCelsr3  EN--GLTHRHRKGILKN RLGCPPALQGLSAVGRAPSEMSWYRTSTLGH RGVPAAS YGRMYSG--TGSLSQ
DmStan    I SPNPLPNPDLTDTSYL QQHKNINMPPSILENIR DAREGYEDSLYGRRGEY PDKYGSYKPPSHY GSEKD
ChFmi    SSNTSDTQSQSKAPV S ILKKSQYDSKGHRLRAVRVKDSQRKPLMSMNETADL NDSQV-----
TaCelsr   NCRSNPPANKRPGSSFS GMPPLAIEEDED DMEVTSF PKNKSYDKQQHAQP PPSIYAKSSVAHQNEASMM
OcFmi    TTVSP---MSSGIEG--VMV RRAVESSSRESSI PQQKINH WKSQGGDDSSSLSSSSTDSLSFGKGRGQ
OlFmi    TTVSPMTVEMSPGIEAG VVVVRQAIETSSRESSI PHQKPLWSMPKRRD VND DDDDDDDSS-----
ScFmi    AHTTTGSAASSALAAA AEYVSPYSLPPPPARVPT PPRISDFPTNPQDKQRPKQQQ PRRNSAP-----
AqCelsr3L PTSCKEIYQSDAESKTGEY TLYDAVTGEAYSATC IMGTFFKYCNKEAGLTQ IFTFENGKNCPRGFVQTSSK

```

```

          3720      3730      3740      3750      3760      3770      3780
    ....|....|....|....|....|....|....|....|....|....|....|....|....|....|
MmCelsr1  -----
DrCelsr1b  -----
DrCelsr1a  -----
MmCelsr2  -----
DrCelsr2  -----
MmCelsr3  PASRYSSREQLDLLLRRQL SKERLEEVPVPAPV LHPLSRPGSQERLDTAPARLEARDRGSTL PRRQPPRD
DrCelsr3  PASRYSSREHLDSLARRQ RSRDNLDLLPR--RRELGA EHLGGSRERLGPVHS IHASREDLVGRGGLAGLMG
DmStan    YPGGGSGSQTI GHMRSFHPDAAYLS DNIYDKQRTL GSGYLGAKSES PYLSKDRITPDIYGRDGHYSLKR
ChFmi    -----
TaCelsr   PGGPRHLVPKPPMRK GHPQPPPRSNPVKP-----
OcFmi    VKGKGRHGKAQQRRRHL AGVEAGQHFSSASSLHSDFNSSVTSSQRNHRRG-----
OlFmi    -----
ScFmi    -----
AqCelsr3L DSCVRSRRKYGGCTSI PVAGHGILYNKVCVMVYGYQV GSPDGVGTDRIRFVEG PYPVDGVSITHGIPRKH

```

|                  | 3790                                                                    | 3800 | 3810 | 3820 | 3830 | 3840 | 3850 |
|------------------|-------------------------------------------------------------------------|------|------|------|------|------|------|
|                  | .... .... .... .... .... .... .... .... .... .... .... .... .... ....   |      |      |      |      |      |      |
| <b>MmCelsr1</b>  | -----                                                                   |      |      |      |      |      |      |
| <b>DrCelsr1b</b> | -----                                                                   |      |      |      |      |      |      |
| <b>DrCelsr1a</b> | -----                                                                   |      |      |      |      |      |      |
| <b>MmCelsr2</b>  | -----                                                                   |      |      |      |      |      |      |
| <b>DrCelsr2</b>  | -----                                                                   |      |      |      |      |      |      |
| <b>MmCelsr3</b>  | YPGTMAG-RFGSRDALDLGAPREWLSLTPPPRRNRD-----LDPQHPLPLSPQRQLSR-DPLLPSPRP    |      |      |      |      |      |      |
| <b>DrCelsr3</b>  | AEGSLSGSRTQLNLTTRQQASREHLGGALMSSRSREQLSNGGAQPCREWLRRLTPPRQLSHDPHPSPSP   |      |      |      |      |      |      |
| <b>DmStan</b>    | QPAYATDSLHSHVHSLKNDYHQQQQQQQHHLQDRLS-----                               |      |      |      |      |      |      |
| <b>ChFmi</b>     | -----                                                                   |      |      |      |      |      |      |
| <b>TaCelsr</b>   | -----                                                                   |      |      |      |      |      |      |
| <b>OcFmi</b>     | -----                                                                   |      |      |      |      |      |      |
| <b>OlFmi</b>     | -----                                                                   |      |      |      |      |      |      |
| <b>ScFmi</b>     | -----                                                                   |      |      |      |      |      |      |
| <b>AqCelsr3L</b> | IWTFMASSEKPKICPCAPG-----                                                |      |      |      |      |      |      |
|                  | 3860                                                                    | 3870 | 3880 | 3890 | 3900 | 3910 | 3920 |
|                  | .... .... .... .... .... .... .... .... .... .... .... .... .... ....   |      |      |      |      |      |      |
| <b>MmCelsr1</b>  | -----DCVITIKTPR-REPGREHLNGVA-----                                       |      |      |      |      |      |      |
| <b>DrCelsr1b</b> | -----ETPSIIKPP--PVPPKPALNGLT-----                                       |      |      |      |      |      |      |
| <b>DrCelsr1a</b> | -----HNVLIKPPRPPVPPREHLNGMA-----                                        |      |      |      |      |      |      |
| <b>MmCelsr2</b>  | -----PRPPRQSLQEQLNGVMPVA-----                                           |      |      |      |      |      |      |
| <b>DrCelsr2</b>  | -----ARRNHVNGAS-----                                                    |      |      |      |      |      |      |
| <b>MmCelsr3</b>  | LDLSLRISNSREGLDQVPSRHPSREALGPAPQLLRAREDPASGSPSHGPSTEQLDILSSILASFNSSALSS |      |      |      |      |      |      |
| <b>DrCelsr3</b>  | PPPIT-----EEPHESLPSRRGRRLDSAPPCRYPSSSAAAPGAPSSRPPSSEHLDILSSILASFSSSVLTP |      |      |      |      |      |      |
| <b>DmStan</b>    | -----EGSDKNGYHFPPYTAEDHLPARKLSHTQPPSLHGSQMLQPPGVGLVNDVNNP               |      |      |      |      |      |      |
| <b>ChFmi</b>     | -----                                                                   |      |      |      |      |      |      |
| <b>TaCelsr</b>   | -----MRQQASLSTFSAESAVSSQGRPSQRSRHGNGPVAVQHSVSDAAI                       |      |      |      |      |      |      |
| <b>OcFmi</b>     | -----LGSTDRHSGRRKYGRRASPGRGGSHSGGNLSRSHSMEGAPR                          |      |      |      |      |      |      |
| <b>OlFmi</b>     | -----                                                                   |      |      |      |      |      |      |
| <b>ScFmi</b>     | -----RRRQEGRTVFTTLAVLDASTR-----                                         |      |      |      |      |      |      |
| <b>AqCelsr3L</b> | -----STVKVPDFIGNDYFCESGNPEETAIPGKIYKEDMIWDMEQCE                         |      |      |      |      |      |      |
|                  | 3930                                                                    | 3940 | 3950 | 3960 | 3970 |      |      |
|                  | .... .... .... .... .... .... .... .... .... .... ..                    |      |      |      |      |      |      |
| <b>MmCelsr1</b>  | -----MNVRTGSAQANGSDSEKP-----                                            |      |      |      |      |      |      |
| <b>DrCelsr1b</b> | -----LDLTTRPVTLADDDFHSDGSNETSI---                                       |      |      |      |      |      |      |
| <b>DrCelsr1a</b> | -----MNLKSATVN-GGNQSDSDGSNETSI---                                       |      |      |      |      |      |      |
| <b>MmCelsr2</b>  | -----MSINAGTVDEDEDSSGSEFLFFNFLH----                                     |      |      |      |      |      |      |
| <b>DrCelsr2</b>  | -----VSGLMKTLDNDSSESEC-----                                             |      |      |      |      |      |      |
| <b>MmCelsr3</b>  | VQSSSTPSGPHTTATASALGPSTPRSATSHSISELSPDSEVPRSEGH-----                    |      |      |      |      |      |      |
| <b>DrCelsr3</b>  | PPNPAGPSP-----SPPPPLSATSQSVSEVSPDSEVNRSDGQS----                         |      |      |      |      |      |      |
| <b>DmStan</b>    | GLMGRHTLNNGSRHSSRASSPPSTMVAPMQPLGLTSTIDTERNIDDETTV                      |      |      |      |      |      |      |
| <b>ChFmi</b>     | -----                                                                   |      |      |      |      |      |      |
| <b>TaCelsr</b>   | SFHNNLSSSGELRNSKQNDLHRSSHSLTSSNGSDAIAIAVRRGSSSTK*---                    |      |      |      |      |      |      |
| <b>OcFmi</b>     | RYKVPRFDKPVGQIVSPTRRGTAEAAYLTRGHQHQEKEHEIATKSDVSTAV--                   |      |      |      |      |      |      |
| <b>OlFmi</b>     | -----                                                                   |      |      |      |      |      |      |
| <b>ScFmi</b>     | -----SSPAPTMSDMPKVALVVVLCRFRSICG---                                     |      |      |      |      |      |      |
| <b>AqCelsr3L</b> | GVEGSCCKSTHKYAYVELPHYTTDDLEIRICSDSDSAEEDFALSMAAISVY-                    |      |      |      |      |      |      |

Abbreviations. Vertebrate: Dr, *Danio rerio* and Mm, *Mus musculus*. Hexapoda: Dm, *Drosophila melanogaster*. Cnidaria: Ch, *Clytia hemisphaerica*. Placozoa: Ta, *Trichoplax adhaerens*. Porifera: Aq, *Amphimedon queenslandica*; Oc, *Oscarella carmela*; Ol, *Oscarella lobularis*; Sc, *Sycon ciliatum*.

**Figure S2.2: Fuzzy alignment.** Threshold for shading has been fixed at 80% for both identity (black) and similarity (grey).

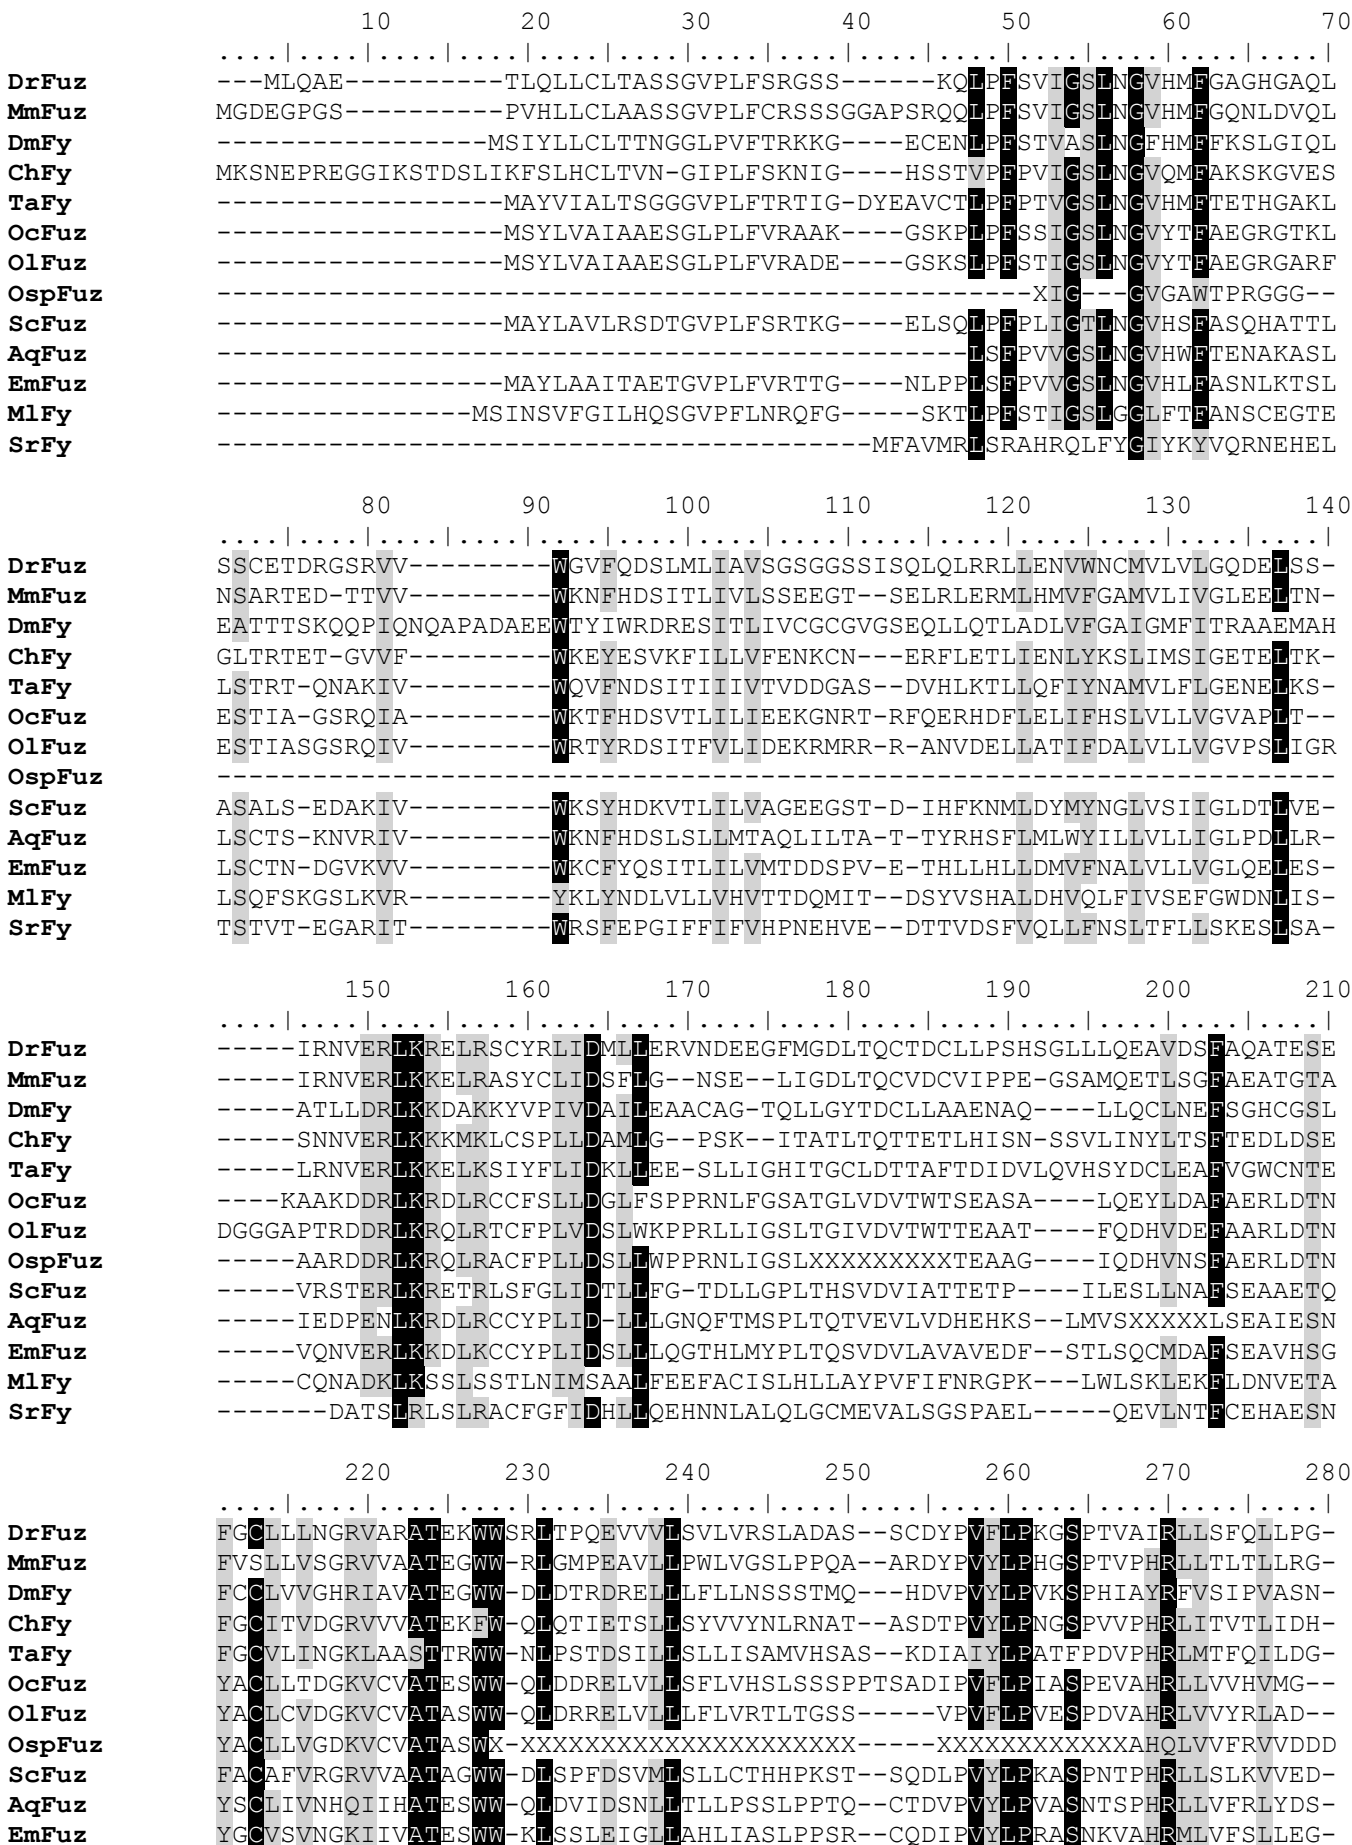



**MlFy** YGCVFHEQNVHVVSGETWQKFPFVECLNLLTCSKIKLDAEKVLKKKLVYLPVSSPNNQFLLVCCNYRP--  
**SrFy** YGALLVGGRCVAATEPFW-ELSSSTDCLVCAAYAAYLPASD--AFDGPVLELPTLSPDVPHERFVRLRLLHN-  
 290 300 310 320 330 340 350  
 .....|.....|.....|.....|.....|.....|.....|.....|.....|.....|.....|.....|.....|.....|.....|.....|

**DrFuz** --VHVCVLCGPKPSLHNAS-ELISRFWSTLVENLRT-----CLEQAKRSSLPSS  
**MmFuz** --LELCLLCGPRPPLGQLDPQLMERWWQPLLEPLRA-----CLPLGPR-ALPEG  
**DmFy** --SALCVLCCGAENASFRELHAHAMSAYRNEGNLLAA-----AERCVPRSLPEH  
**ChFy** --VQIAIVCGPEPSLHEIQNKLIIVHYWSPVLPYLRE-----CLR-----SLPRS  
**TaFy** --VEVCVLCGSTPSHNEVLQNVCSIKDRSITYGTCCRIFAANFRFILEKLYRYFKKYACTKSSSTFHN  
**OcFuz** GAA-VCVLCDLATSLEHVERDVVPQCWTS-ALDLLK-----SSSYMLARGLPIG  
**OlFuz** GAALLCALCDLNASLDHVERDVVSQCWTSALDVLKRL-----TASPSSPKCRGLPSE  
**OspFuz** DGALLCALCDLD-----  
**ScFuz** --FTVALLCEAVPTLEDVQEQILPSIWTGHLDTVHK-----CIQTFPRNVPAQ  
**AqFuz** --VSLLVLCDETPSLDVAQKIVV-QIWLPLRDKIIS-----LPLLVPRAFPLS  
**EmFuz** --VHVCVLCDAEPSLRRQDEVG-VYWSGLTERLVR-----CARNTS-CVPAG  
**MlFy** --FRVFALCPPTIQDSEILSAFNRFVFPQKDSSTLVK-----EDMFDP  
**SrFy** --VYVVLLCGARPALHTLVQQLVPSIWKGILPQLD-----TARLEETGLPSS

360 370 380 390 400 410 420  
 .....|.....|.....|.....|.....|.....|.....|.....|.....|.....|.....|.....|.....|.....|.....|.....|

**DrFuz** VSLRWDVQALLLINCDSRRALTVCPRVRVGAPEADTPELLISTARLELLRFLYVFAVT-----  
**MmFuz** FPLHSDILGLLLLHLELRRCLFTME-----PSKDKEP--SPEQRRRLRNIFYTLVAT-----  
**DmFy** LEIDGNVLAIIILINRHTRKSLFTRNLNQSASVKRIIVG-----DLQRLDILKFFD-----  
**ChFy** F-----  
**TaFy** SRFWNTWVGLSPENSKKVKFKIIIFCYTLKMLWVLFNDAFRFILLNQNRSRKCLATFVRALSNTGIDD  
**OcFuz** VRLDPGVNAYVFLSQTPSMCLSSFGGLGDDKSSRLGRESQQEKLVDIFYWMVVGEMFPS-----  
**OlFuz** ISLDPGIMAYIYVTRCPPMCMDSDFNLDSSSSSSSSGR-TWQEEILDIFYWTVAGEAFPS-----  
**OspFuz** -----  
**ScFuz** VSLENSLLAFILVNDETHRCLSSYDLGPAQPPDAPTN-----ADFLSPGQRRLLVLTSS-----  
**AqFuz** VTMDSSVIGFCFVNLLTRRSLLSVLS-----YETQERNPALLS-----  
**EmFuz** VELSSSLLAFLVNLKSRRCVSSLPKSTFSGDFSNNTLSAGFQGELSTEERHRCLVEIYKTVADNMLPSQ  
**MlFy** IKFDPSILALTAVKNSESIYVVDNFASEEHKMRKTLSTLTRLISGDVVDEHGTLG-----  
**SrFy** STVHESVLGVLAVDPVYHRCLVTTTSPDPVQLQHTRCPTR-----RILRAWYKQILDAR-----

430 440 450 460 470 480 490  
 .....|.....|.....|.....|.....|.....|.....|.....|.....|.....|.....|.....|.....|.....|.....|.....|

**DrFuz** -----RYFTSQESTASDFAQGF--HVPVQCYLVTDECKCFGLQSPQH--QLFLLMDPS  
**MmFuz** -----THFPPEPGPAEKQEDTVYPAQMPRACYLVLGPGMGWQLVAVQLGLRLLLLLLSPH  
**DmFy** -----QTMDAVHQFETQSSSNKTTLVDQYSCSDYHKCYAHMDELGNVIFLLFVAA  
**ChFy** -----  
**TaFy** SAAIGKYNLIRLFSAGHNEQKHIILEDILIPLTLVYYFTYLAIQIQQNYSGILWLSFINLSIRYFPLIN  
**OcFuz** --LAAASGKVTEQDKVGGGDTGDTGDSGEVKNWLAHSCLETYICTEQYKCYALYC--EQKQLYLLLSAK  
**OlFuz** --LTTTT-----MGDDGDEERHGRWLTHPCSETYVCTEYKCYALYESHERKQLYLLLSAD  
**OspFuz** -----  
**ScFuz** -----FYKSTVGSMPHALQDDNGADTDLRNIIPHQPVETYLCAEEYKCYALHFNFHQLFTLFTP--S  
**AqFuz** -----KGTIYIVP-----IIRN-----VGIDCSKISVL-----  
**EmFuz** VKDGLRQETAGTDSVQPRPPEEVSPVNGRLLRASVPHRIAESYICTKKYKAYTLHQDGYNLFLVLLDP--N  
**MlFy** -----NVDSFFVKNMNMCHLISNQDILISALFKPNISQILSTALIAD  
**SrFy** -----HQLDQDQQLHETYSCHETYSTYAILRPTCHVLVVLAP--S

500 510 520  
 .....|.....|.....|.....|.....|.....|.....|.....|.....|.....|.....|.....|.....|.....|.....|.....|

**DrFuz** VPTFALRTVATQTLSAITSATGF-----  
**MmFuz** TPTHGLRSLATRTLQALTPLL-----  
**DmFy** VPESHAMRFLAQRIHANILQEKSVCW-----  
**ChFy** -----  
**TaFy** AIQQVWNYLVTSLCNNLFCVIELVMVVAYFGFICYIVM  
**OcFuz** VPTYALRDVSHRTLKLLARSMDIVPGTSK-----  
**OlFuz** VPTYALRDVYRTFKVFGQSADVANTGK-----  
**OspFuz** -----  
**ScFuz** TPTYSMRSLSYSTLDSLTTDQFISV-----  
**AqFuz** -----  
**EmFuz** TPTFALRKATMDVYKTLTGNTVEGAMGGALVN-----  
**MlFy** IVDYFLERKKK-----  
**SrFy** LPTYALKAVAQETAATLSQLGLG-----

Abbreviations. Vertebrate: Dr, *Danio rerio* and Mm, *Mus musculus*. Hexapoda: Dm, *Drosophila melanogaster*. Cnidaria: Ch, *Clytia hemisphaerica*. Placozoa: Ta, *Trichoplax adhaerens*. Porifera: Aq, *Amphimedon queenslandica*; Em, *Ephydatia muelleri*; Oc, *Oscarella carmela*; Ol, *Oscarella lobularis*; Osp, *Oscarella sp.*; Sc, *Sycon ciliatum*. Ctenophora: Ml, *Mnemiopsis leidyi*. Choanoflagellata: Sr, *Salpingoeca rosetta*.

**Figure S2.3: Inturned alignment.** Threshold for shading has been fixed at 80% for both identity (black) and similarity (grey). Red squares correspond to the three C-terminal motifs described in the present study.

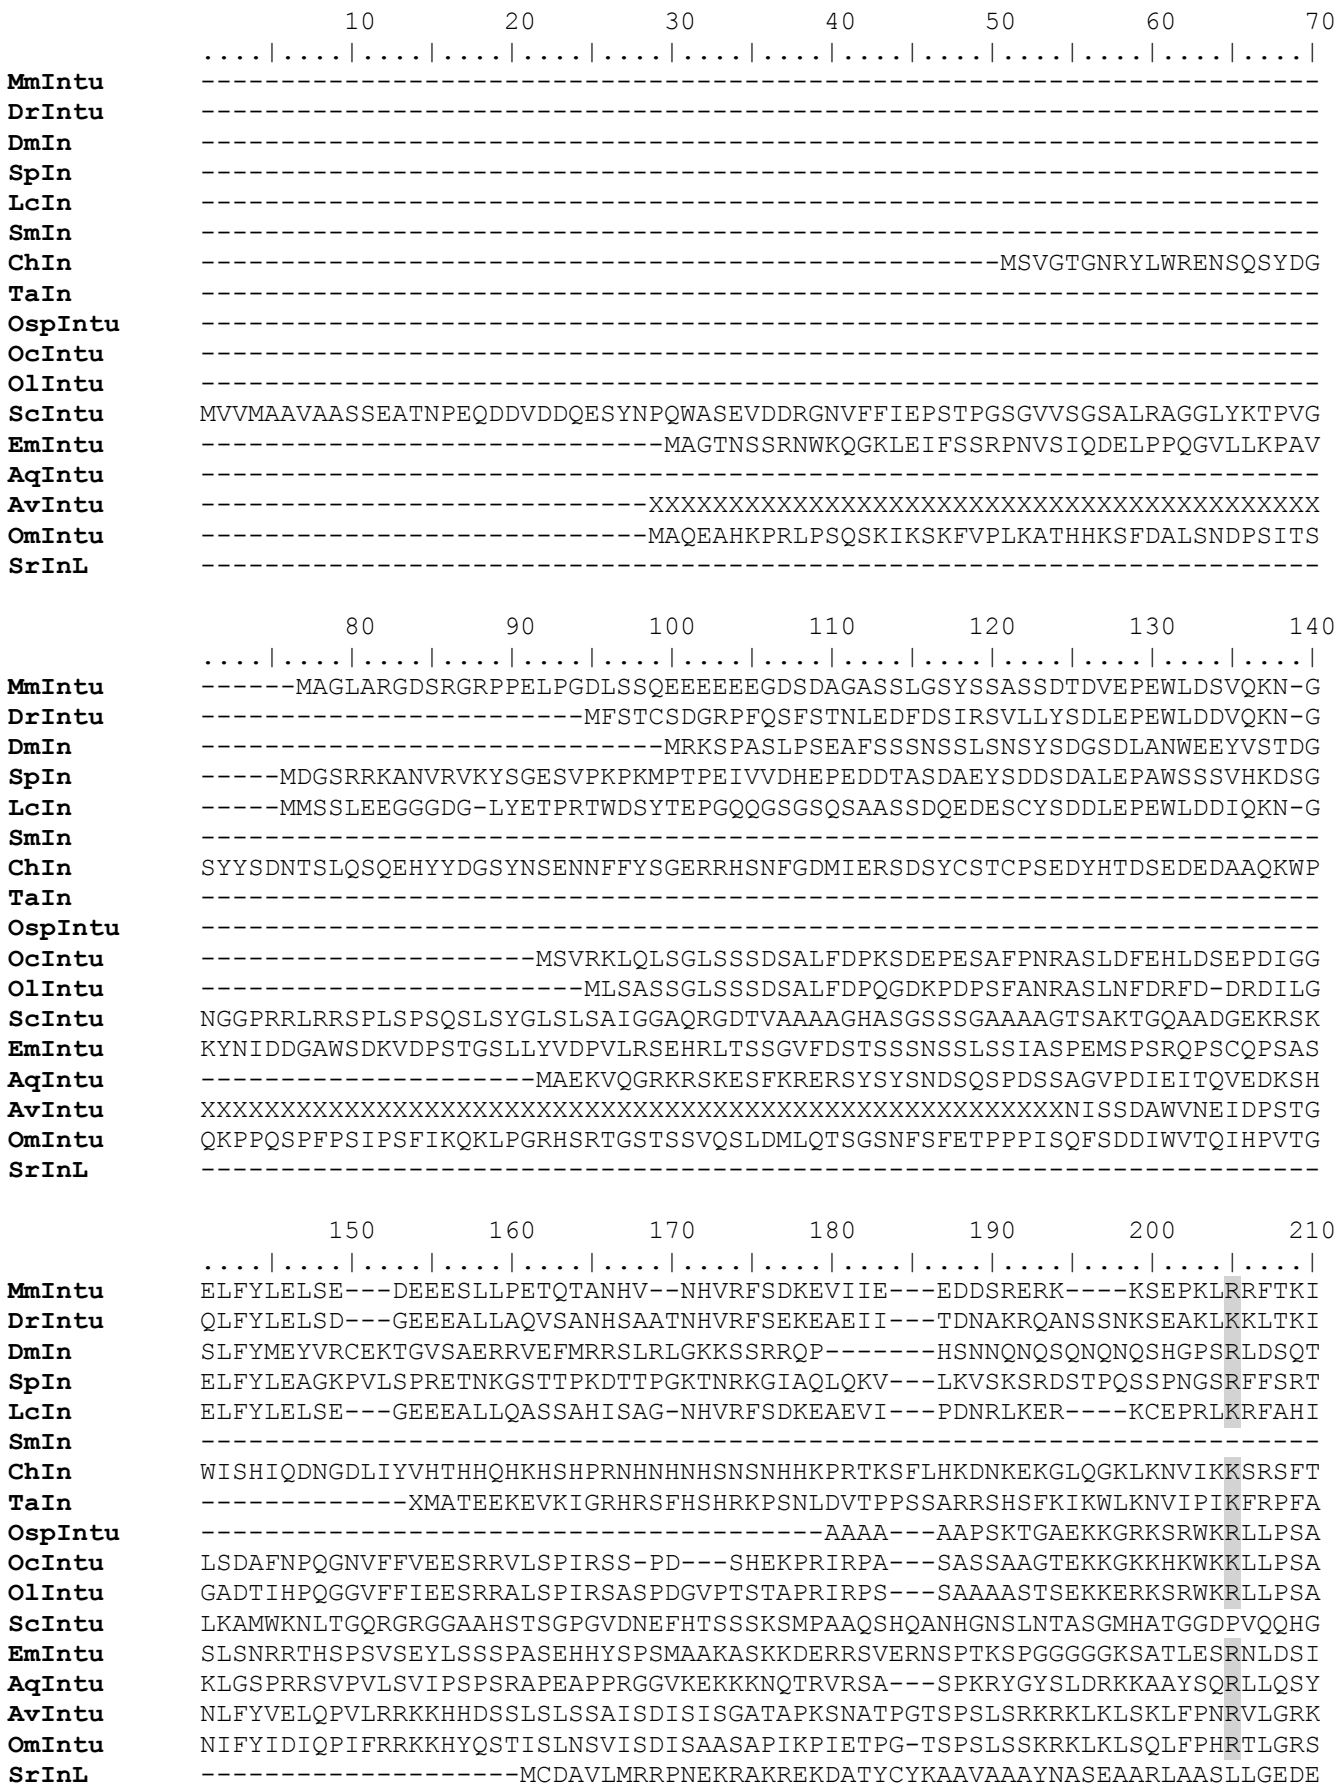

```

                220      230      240      250      260      270      280
.....|.....|.....|.....|.....|.....|.....|.....|.....|.....|.....|.....|.....|
MmIntu LKSKSLPRRHKKSSNN-----G PVSILKHQ---SSQKTGVTVQQ-RYKDVTVYINPRKLTAIKA
DrIntu LRRKRRPSQRKAEGKDSSQ-----R PASILKNQ---AGQRPGVVVQQQLKDVVCVYLNPKRLSSVSS
DmIn EPQEFRFSQFKTAAPDPKK-----L DLVITAADRFRFRGRRSTAVESILGFRVLPFPDQ
SpIn PPGSNHKLRRSSPGSQSNG-----G TPVKE---VILKVGTSPPGSPKDTLSIRLQGWLGIVPGK
LcIn LKKKNLSRKPSKRNSPCNANDAGSQPSGPTSILKHQ---P SQKTGVIVQQ-RYKDVYVYVNPKKLTHSGV
SmIn -----
ChIn KKDVIDKNIDISHFKNSEK-----K KQONPLTDTTTEIQITITTDGVHLLCKNVLIHLNDKVQESFAN
TaIn HLDDDSPIQTDDPI SPAG-----A ADVFRKITLQLDTPVTITDLED SLGIKVQFYGELSETIQE
OspIntu LMRRAGSKAKESXXXXXX-----X XXXXXXXX---XXXXXXXXXXXXXXXXX SLESLGIVVGRGD-----
OcIntu LMRRAGKG--AKKATMDGR-----T GKTQIVS---VKSPDGRKLRVDSLQSLGIVTGRSK-GEEGR
OlIntu LMRRAGKSRKTKSDVDER-----V GKTQTIV---IRVPTGR--RIDSLES LGIVAGRSVRGEE--
ScIntu PQRKPLAGLSEHPTVGS SLEHHAHEVQPTMTT SKLKTVVKVTVKMPSDMSAKTDGDM SLRLLGITAE CR
EmIntu SLCSDSLDPDTRRSLT TYFRSVPEGEQFGSRGL PLDENAACITRVKIDLAQYHIGTDGNPCSLELLGILPD
AqIntu SSGLDTPNLIRDNDTCNN-----S LTDGREE---TLTKVHINLSQYKLG LPHVPCSLEALGI IPT
AvIntu KQTSTPNPVRLSTFSL DEKLNKLTSTESSKAP SVIYTSNKLITNXXXXXXXXXXXXXXXXXXXXXXXXX
OmIntu KKKNQSQSPMHKPARNST ISLDEGKLLKTSLP ES PKPFRSKSVTNSIYLN LKLPQSDRDSNPITKLD SLT
SrInL ADTSDAVDVAASAGGGDGS-----R AQREGSESERHGDGGKQAGG-----

```

```

                290      300      310      320      330      340      350
.....|.....|.....|.....|.....|.....|.....|.....|.....|.....|.....|.....|.....|
MmIntu R--EQVKLLEVLVGI IHQTKRSWKRS AKQADG-----E RLVVHGLLPGGSSAMKSGQVL-----VGD
DrIntu SSADRGGLLEALLGVVHR PGGN---T GKRRGGK-----L ITHGLIPHSPASKCAEIL-----IGD
DmIn P-----E CLMVDGFVHDVSA LQHGIKR-----GD
SpIn G-----A TDLLSGSVMGN GREHKNGGPVRVD-----D RLMVRGLLPQGAAMKSAEIE-----IGD
LcIn G--EGTNLLEALIGILHQ SSWNGKRAGKDGGQD T ASKGTCEERLLVHGLLP GSSASKCGQIM-----IGD
SmIn -----
ChIn LENVIGVISGLDLDPVLD DFDSDNILMNGNSTRYN-----S NCIVVQGIIPNSPAGES-EIN-----IGD
TaIn GK-----L DILQVAGIDSN SPAYRCGQLS-----IGD
OspIntu -----E RRVRRIVPGSVAEIGNQIR-----MGD
OcIntu HG-----K GRLVVKGLVPDSIADKTREIR-----NGD
OlIntu -----K GRFQVKRLVSDGLAEKRNEIRVGEKRN GD
ScIntu PRVPSSSGPNGAASGT SPNLPRHTAAARA AVEN-TLLED TSDVLVITAIAPGSP AASAAASGTARLQTGD
EmIntu RRSMTRGHAI FASSRLSLRSHRRHLP G-----H DRVVTKDVTKGSP AASQQLH-----KYD
AqIntu R-----Y HSSGKGSFLSLTRRSLKGASSKKP-----V PVIIRAVLPSSP AALTEELS-----PGD
AvIntu XXXXXXXXXXXXXXXXXXXXXXXXXXXXXXXXXXXXXXXXXXXX-----X XXXXXXXXXXXXXXXXXXXXXXXXXXXX-----XXX
OmIntu KFGIIIQQPRIKSSKSF DDLDDGSNAVSREKHTS-----L SPVIIQSIIQDSPASIDGSLR-----SMD
SrInL -----V DATATAAAA AERGSDS-----RDD

```

```

                360      370      380      390      400      410      420
.....|.....|.....|.....|.....|.....|.....|.....|.....|.....|.....|.....|.....|
MmIntu VLVAVNDVDVTS ENIERVLSCIPGPMQV KLT FEN--AYAVKR-ETAQPQKKAQSSTQDLVKLLCGSEAD
DrIntu ALVAVDDVEVTSENI ERVLSCIPGPMQV RLTLET-----V CPAGVSPESKVSASPQVSQLVRLWGEDTI
DmIn WFRSLNGIEVYASNVD ELLKQFVEPTQVCLGFQ SCGAASAVSPTDPGYNRNVREEQVCKVENFPMFTEKF
SpIn VISAINGVPVSYSSAEAV LNSMEPVKQVRLSVER-----A PSWNEHNPSPVVCRPPNGTLVKMLNNAIEA
LcIn VLVAVNDVDVSL ENIERVLSCIPGPMQV KLTLEMPVCDPVRSGPSLQHSSKQTLTPVSNLVRLWGEDNL
SmIn -----
ChIn IILAINGIKVNLQSVNS IVEKINGTQEIVLTIER-----L ATVVEPEKPSSELCSIVSNTLDEGAKED
TaIn KLISINGHEVTTSNL D ELLKSLGEVSEIELVVTR---V AFLKDDFKIQPKITRIDPDLIVSKGDTRQN
OspIntu CIFALNGMPVTE DTVDRVLRDCANENEXXXXXX-----X XXXXXXXXXXXXXXXHSSSTATPALIHLFSGTPSA
OcIntu HIAAVNGIPVSKETV NQVLRDSIGAKEISLTVYR----M VASQSSGVKLRRHISTATPALIQLFNGIPSA
OlIntu YILALNGTSVAKDI IDQVLRDNSDSNEISLTVYR----M GMSRTR-VRLRRHASTATPALIHLFNGTPSA
ScIntu EILQINGVNVSTRNIST ILA AVAFYKEIAMRVQRD VSLKASKMSSTSTSSQHLLSLMRGTGAGGGGARRQ
EmIntu IILAVNGHCVDMSNVDS VLSGVIDEVQLMVQKHS-----L QLPLSPDPGSPSLSKLVAGSKVT
AqIntu EIARVNGDDVKMRSIEE SLSKLTNEVIFDVYKCT-----P SSPSHTLSPPTYFSDTTSPTPP
AvIntu XXXXXXXXXXXXXXXXXXXXXXXXXXXXXXXXXXXXXXXXXXXX-----X XXXXXXXXXXXXXXXXXXXXXXXXXXXX-----XXX
OmIntu KIVSIDNNVTQDN IHIILDKLKNKPLTLEIQKEQYSNFTYTNPDTE DVSGESGIAESFARLVAGKETF
SrInL TVVTD DDTATAAEHGPVNREHNQAGTAAADVNSRTG-----S SSNPHQEANKAEQEKEQEKEQEKEK

```

```

          430          440          450          460          470          480          490
    ....|....|....|....|....|....|....|....|....|....|....|....|....|....|
MmIntu AVQHSTL-----SIPHISMYLTLQLQS-----EAAREEQEILYHYYPV
DrIntu ELQMSIA-----DVPHIAMFLSLRLDS-----ETQQDEQEIYVQYPQ
DmIn EQMLITEGN-----FGIPGSSVDIRMPFAMLLLPP-ECYQHEQQQDSLYYFPE
SpIn ASKQQDQQQQGKEEGNPHTS-----PGDDVPCAIMYLTIVRDS-----DSD-DAQEVLYKYPS
LcIn ELQLGLS-----SSPHIVLYLTLKLDL-----ESSKEEQEILYHYYPV
SmIn -----
ChIn VFHAYHD-----TCMVSLTLNSNE-----DDVDGDILFWYYPD
TaIn DEEVDLY-----QVPHVALCLTMGSSA-----DEDGDKDIVYKFSL
OspIntu NWKMTXX-----XXXXXXXXXXXXXXXXXXXXX-----XXXXXXXXXXXXXXXXXXXXX
OcIntu NWKMTMS-----GIPHCVMYLKLVS---S-----EAED--DKDIVYSYPS
OlIntu SWKMTMS-----GIPHCVMYLKLTGDDDS-----EGNDGAEKDVLYSYPG
ScIntu YSPYNARTKDasASGNNDQFGSRAPNIAVKPKVALHGLMYLTGSGSGAGSSSKNDEALHMEDILYHFPQ
EmIntu LRLSLSHSLR-----SLPHLLLYLTLDTRE-----DDHPDMDILYRFPF
AqIntu SSSFSPF-----PPLILFLTLDTK-----EDDPPDKDILFCYPS
AvIntu XXXXXXXXX-----XXXXXXXXXXXXXXXXXXXXX-----XXXXXXXXXXXXXXXXXXXXX
OmIntu ENIAKTSEK-----DIGTYLCLYMTINDKN-Q-----VSKDQGMDDLVFYYPH
SrInL GNKAKAE-----DEEQEENEDEQPA

```

```

          500          510          520          530          540          550          560
    ....|....|....|....|....|....|....|....|....|....|....|....|....|
MmIntu S-----EAS---QKLKSVRGIFTLCDMLESVTG--TQVTSS
DrIntu S-----EAS---AQLKAVRGIFTLCDMLENVTG--GQIISS
DmIn IP-----DNFLFKARGSEFLTLHAVLSELHT---QPLSS
SpIn S-----SAS---TKFKDINGLFI TLGDMLNITG---SKITCT
LcIn S-----ESS---QKLKAVRGIFTLCDMLENVTG--GQVIR-
SmIn -----MFMITGQMI PDVDLS-TPLLSC
ChIn S-----EKSILRNTRGIFTLSDMLTDVMA--EHIQSS
TaIn S-----DTQAKVLTALRGLF TLMSDVLLQVTL--DNVFAT
OspIntu X-----XXXXXXXXXXXXXXXXXXXXXXXXXXXXX-XXXXXXX
OcIntu E-----DSHWRLSKLILGIRGAF TLSDMMKEITG-SYAE-SS
OlIntu E-----DSHWRLSKILLNVRCAF TLGHMMEEVAG-SHVERSS
ScIntu CTAATAAKKNGDDEEGNDGKRDSAGGRHGQTGQSAQWSPIDHLVSI RGVFL TLSDVLLQVVTG--TSTSSS
EmIntu E-----GAER----LLQTRGLF TLSDIVGSIGH--NALSCS
AqIntu R-----GCHH-FLDQIVSLRGAFL TLNLIPTISSLSYTTSS
AvIntu X-----XXXXXXXXXXXXXXXXXXXXXXXXXXXXX
OmIntu QPIPKNIDS---KDPAASSLHKLVAVRG MFTLADVVQSI SG-LAGDRAT
SrInL S-----ALGVLSGALITMIDSFPEHVT-RDMPIGN

```

```

          570          580          590          600          610          620          630
    ....|....|....|....|....|....|....|....|....|....|....|....|....|
MmIntu SLHLNGKQIHVAYLKE SDKLLLIGLPAE--EVPLPQLRNMIEDVAQT LKFMYGSLD-SAFCQVENAPRLD
DrIntu SLWLQQQLVHVGYWKEESNLLVIAVPAS--RVPLLYLQTVIEGVVVRT LKVMYGSLD-RGFSVDENAPRLD
DmIn RLLVDQVQYHVNYRQLNGFLVLFAYAGG--LCCAaecSLRSDELIGYIRFSLPGLVLESFNQERE PGNSS
SpIn SLEVGDELVHVGYHKWGSSELLVLAFFAC--FASKHTVQCMVQQLARL LNFMLSLN-RAFSERRNHQRLD
LcIn -----VPLPQLRNM MADVVQTLKVMYNSLD-SAFYQVENVSRLD
SmIn NITVQNEVVHVGF GKEENELLV LALPSA--CATVREVQYFTANIVKLLKFQYSTLE-NAFMTEYRNRIE
ChIn VLYTNKETIN VAYKKCGGNLVVAAPDH--KCDLNTLISCTDDFSKLLTIFNGDLN--RAFTDENMESTR
TaIn SLLIDKMITNVVYVYQFEQNLFILAVPDQ--RCGLFLLNRTIRNIARLLKVLVYGLSH-SAFFSTQNEQNLN
OspIntu XXXVNDRLIHVGCRCQCGKCLLILALPAD--TIHLHSLVQYLD DICKLLAF LFGSVARXXXXXXXXXXXXLD
OcIntu TVSVGEKLVHVGYRQC GKCLFV LALPAD--VVHIHSLSEFLDDVCRLLSFLYGSVS-NAFESGQNTSRLD
OlIntu TVFVNDQLVHVGYRHYGRCLLLLALPAR--TVHLHSLVEYLD DVCKLFAFLYGSVPRSAFESSGNFKRLD
ScIntu FLVVDGKPIHVGYLQLGENLMVLM L PAT--SAPLFYLD CVMEDIDRLTITFGSIH-SAFTKKRHKERLD
EmIntu SLIILDGRLVHLGYIQSGKELVLLALPAT--LASLYHIQLLIKELQQTLELMFGSLA-SAFKKRENHPSLD
AqIntu VLVDGELFYISGHLV GKELLLIAQTG---VSNYQVELVLD SLVECELVYGDLM-SAFKS--DSSTLS
AvIntu XXXXXXXXXXXXXXXXXXXXXXXXXXXXXXXX--XXXXXXXXXXXXXXXXXXXXXXXXXXXXXXXXXXXXX
OmIntu LETTNGEIVHAAFKLLPNKEIVVI IAPENVVEEKTTL CNHLDTFIDALTFQFGNVS-NAFMQQSNLEELD
SrInL TQVLSGTLVHVAYVYLED DYLAVACDAA-ACPFVHLQTKLVEFVRV LKSLYCDFQ-ALLVSARHHRLLT

```

```

        640      650      660      670      680      690      700
    ....|....|....|....|....|....|....|....|....|....|....|....|....|
MmIntu HFFSLFFERALRPGKLHLSGSPSAQQYAAASAVLLDNLPGVRWLVLPQELKVELDTALSDLEAADFEELS
DrIntu HFFCLFFQQLIQPSRLIHSSRTP----DLYGSLFLDGLPAVRWLTLPDQIKVEVDTVLSDFESSDFGDM
DmIn RLKFLFRHFCEIQRTRLVARCHG-----HIRFEELLGQSRSLPLPKEAQLRIFDALSEMEAMDYRNWN
SpIn HLFALLFHQVLVDRSQLEP-----RKKHKEDIFLQMLPGVRWLNLPDQDKLNVDCLSELEAADFADLC
LcIn HFFNLFQRAIQPARLSSSSSPSSQQYDSFSAAFLDNLPGVRWLTLPQDIKVEIDTAMSDLEAADFADLS
SmIn IYCADFFEYFLGVSYSQK-----GVSCSHTLEILPSVQWVPLPIDLKTEIDDIELSESSDFESSC
ChIn HETSLFLDLLQRKP-----VVVFGTVRQLQLPTKQMIETSNVLSDVEEAADYGEVCV
TaIn KIFKYALYRLLTPATDLASMR---FLKAFYPTYLAHLFEAAPSLFLPNVDQALVSGALTKLECGSYFQMP
OspIntu HSFLIFERILNPGESGF-----SRTNDTCHGLLKYVQPDLLVKVSSVXXXXXXXXXXXXXXXXX
OcIntu HTFSLIFERFVSAGESGFS-----TRTSDTVHGIPKLYIQPDLLVKVSSVLDNDESDDYSDTL
OlIntu HTFSLIFERLLSPGESGFS-----TRMNDTSHGLLKYVQPDLLVKASSVLSDESDDHSETV
ScIntu QLFSLIFERLLSRDRDGYH-----HVTDALHGIHRLPIPFVQSKISSVLSLEADDSILD
EmIntu HIFSMFFQKT LAPLPCWGT-----SLLKGVACAPVLSIPLDHRLLKLSAALTELDSDVDRSSLP
AqIntu GVLSSILSFSSSP-----NSFLFPALQQLPLSIKTAQISSHLNQIDAASYSPL
AvIntu XXXXXXXXXXXXXXXXXXXX-----XXXXXXXXXXXXXXXXXXXXXXXXXXXXXXXXXXXXXXXXX
OmIntu HLCCLLFSNIYRTVLFQDS-----DVFISNLMASQTRINSEINTEINSLSELNASDLSQD
SrInL LHLTRFFAHLASYQHRLG-----HHCSIHNHPSSLRLSIAGVRRRPRVIQKALHL

```

```

        710      720      730      740      750      760      770
    ....|....|....|....|....|....|....|....|....|....|....|....|....|
MmIntu EDYYDMR-RLYTILGSSLFYKGYMVCSHLPKDDVIEIAAYCRQHCLLPLA---AKQRIGQLIIVREVFPR
DrIntu EDFYGMR-RLYVILGSCLFYKGYLIANHLPKEDLLDVLCLYQHYCLLPLA---SEQRVAQLVWREVFPO
DmIn DEPLTTH-REFFIYGSALYYDGFVLVASLLPPEVRVSVVEGFLRCRGIFELLGAAPGIKVMREMYVWEEIVLP
SpIn DRHFDYR-RPYVILGSCLLYKGYILANHLPVDDLMDVHLYVQYYSLSLS---TQQAVGQLVIWREVFPT
LcIn EDYFDMR-RLYMILGSSLFYKGYLIGNHLPKDDLLDIALYQHYCLLTLA---AEQKIGQLVIWREVFPR
SmIn HGFYANQ-RIYGILGSCIFYKGYLLSNHLPKSDLLDFHLFLHHHVLKLT---RMQPVSKIIIVHEVFP
ChIn DDFFPHQ-RLYGTIGTCLFYKDNLVCSHLTDENLQDVVTFCKYHWFMLA---KSEKMKQLVWLKEIFLT
TaIn GQMTHTR-RAYASLGSCLFYKGYLVASRMRDEDFLDTRLLCFYGLLDAS---KRHIGGNTLWHKMNLO
OspIntu XXXXXXX-XXXXXXXXXXXXXXXXXXXXXXXXXXXXXXXXXGIYCRYHCILSAM---RKQKLGHVIWTKIFDT
OcIntu DVLMLRR--RYRIHSSCLFYKGYLIDSHMSSNDLADVGLYCRFHCILGAM---IKQKLGHVWTEVFEK
OlIntu DVLVLR--KYRIRSSCLFYKGYLVDSHMMDEDLVSVGIYCRYHCILSAM---RKQKLGHVWTKVFSG
ScIntu EVLYMRR--PFLILGSCFFKGYLIESHVPEEDTQDLALYCRYCLLQLS---SRQRLGQLVIWHEIFLS
EmIntu EVMCVPS--PYRVVGCFFYQGTLVCSHLGNSDLQSVVRFCHAHRLLELT---AAESVNQIIVRQVWLP
AqIntu LSPPGSSPSSLSPGLSCLFYKGYLVSSHLTLQLLRAAHLVCFVTRQPL---AELTS----VWQIYLK
AvIntu XXXXXXXXXXXXXXXXXXXXXXXXXXXXXXXXXXXXXXXXFCSFHGLLNL---STQVAGQIVWREIFPT
OmIntu EISAMQR--PYHTLGSCLYKGYIICSQLPASYQREVNLYCSYHGLLNL---STQVSGQIVWQVFTS
SrInL PSLETCDPRCMISSG-----RGNVAFHFLAAEPGTGLVLVSDPFAPLNEH-----SLQAKVLDQFYRT

```

```

        780      790      800      810      820      830      840
    ....|....|....|....|....|....|....|....|....|....|....|....|....|
MmIntu HHLQPPSDSDPE---AFQEPGRYFLIVVGLRHYLLCVLLEAGGCASKATGNPG-PDCIYVDQVRATLHQ
DrIntu RRETRNSTAHP---GYCQPHARHFLIVGLRHFMCVLEAGGCASSAVGRPT-PDSVYVDQVKATLLQ
DmIn SAT-----GRYFLTICTKNHLSLAVILKIFDAPDMAPDAVVGPSLFYIEEIQETLDH
SpIn RRVQPIEAPHP---GYTEPQGRWFLIVGLKHSVLCVLEAGGCASPCEGVVY-PDEFYVDQSRATLLH
LcIn RHFQLGKDPGVE---GYREPEARYFLIVGLRHFLLCVLEAGGCTSKAIGNPG-PDCIYVDQVKATLLQ
SmIn RHQEPSIVN---S---DFQETSGRYFMLIVAMNHCVLAVLLEAGGCAMKVEGFPP-PEPFYVKEVENTLII
ChIn EKSGESPTTKN---IYETPENARWFLIVVGQHSFLCTLEETGGAASIPENPG-PHPYVDTAWSILTY
TaIn RLQGEKRS-----YGVFTEDSYVYLLVVCVNSCVIATLLECIIPSDTISQSE--ADPIYVNSARDTIKY
OspIntu KDE-----GASSE---QRYLLVGMANALVCVLEAGCAAEEELSPN---ADPLYIDLAREVILT
OcIntu ETG-----ATNGEDYRRFLIVGMANALVCVLEETGCGTEEPLPHPG-PDPLYVDLAREVILT
OlIntu EEE-----AAG---QKYLLVGMANALVCVLMETGWELEELPPHVG-LDPLYIDLAREVILT
ScIntu RRGPLVSENQPED-PAYVEQTGRTFLIVGFNHALLCVLEAGGTAKVTGHPG-PVPYVVDVAEEALST
EmIntu STDTPSED---H---TYFLHRGNTYMLVFGVERVIVCMVLESR-HSGVMGGVAA-LDTTLVESANTLVAE
AqIntu EE-----SQSDANLFLVLAIGMEHTLLCQVSVG---RELNISSF-PDRVKENCRKILSD
AvIntu ISEASIRKNQTQKNLNFKSLGGKHFLIVVIGIGQSICAQILLAGPMATRLLDKPX-XXXXXXXXXXXXXXXXX
OmIntu NVEPPSTPKTHKN-ISFKCLGGKYFLIVLGLGQALCAQILLAGPMATRLNLPP-PDPLLVDRIKEMLDE
SrInL SLR-----VRALLHQSRASNTSSSLFTAPPPPPSSSSPLSSAATPSTPSRRHSAM

```

|                |                                                                       |            |               |                 |               |                    |             |
|----------------|-----------------------------------------------------------------------|------------|---------------|-----------------|---------------|--------------------|-------------|
|                | 850                                                                   | 860        | 870           | 880             | 890           | 900                | 910         |
|                | .... .... .... .... .... .... .... .... .... .... .... .... .... .... |            |               |                 |               |                    |             |
| <b>MmIntu</b>  | LEG-VDSR--IEEQ                                                        | LATSPG     | PCLSCADWFLA   | AP-REKADSLTT    | -----         | SPILSRLQGPSK-TAASP | ---         |
| <b>DrIntu</b>  | LES-LDAG--IEER                                                        | LASAPPTPCL | SCADWFLPAGGRS | QQDTIGS         | -----         | SPILNRLTAAIKPPSPGG | ---         |
| <b>DmIn</b>    | LVQCGIESLAMFWS                                                        | VSNKRPEVLD | DATASESRDQEK  | EPNNRLESFLKQKLT | TVLSPSVEEEAQL | CSSSLGGS-          |             |
| <b>SpIn</b>    | LET-LDVPSACEER                                                        | LKVPPIPAL  | SCADWFLPSPRR  | GSFDSVPPRPH     | PDSPMLSKLH    | SQSQTPLK           | GKKPE       |
| <b>LcIn</b>    | LEG-VDSS--IEER                                                        | LAAPPSPCL  | SCADWFLPSS    | -RDKLESFTS      | -----         | SPIFSKMHGSTKSAV    | VSP---      |
| <b>SmIn</b>    | LHD-CGIASAVDN                                                         | MLSICLPPV  | ATPDLFFKDC    | ASTWNPLSSI      | FTSTGTAYSS    | NSNINNVGN          | FSGHSG---   |
| <b>ChIn</b>    | LIENMDYETSSHS                                                         | RLEGPSIP   | AVVHATEAIN    | PKTSASPRAIE     | LIKRKVPIQR    | RRPHDHLS           | SISHSISN--- |
| <b>TaIn</b>    | LEC-DGFFAICDD                                                         | RINNVSCA   | ELASADTFTT    | SDSAVKRSS       | SLSASSRR      | STVSTGNT           | PNHHRHP     |
| <b>OspIntu</b> | LNV-RGLLEALDM                                                         | RLTSSRI    | PAVTHADEL     | AWMS            | -----         |                    |             |
| <b>OcIntu</b>  | LNV-RGILEALDL                                                         | RLLSSRI    | PSTTQADAL     | VSA             | -----         |                    |             |
| <b>OlIntu</b>  | LNV-RGLLEALDM                                                         | RLTSSRI    | PAVTQADDL     | V               | -----         |                    |             |
| <b>ScIntu</b>  | LSS-RGLLQACD                                                          | SRIQMAPA   | PAVITASQ      | ALSATSAMQ       | PALLKFAQQ     | HG---              | IKAVKED     |
| <b>EmIntu</b>  | MRA-KGLLEGL                                                           | ERRCGGG    | CVGGYGVCT     | TTPFPSLV        | LADTAMAT      | -----              | MFSSRHH     |
| <b>AqIntu</b>  | IHS-SGLLSDC                                                           | ERRLIG--   | LPALTSAD      | VLLASN          | -----         |                    | LTAAAAG     |
| <b>AvIntu</b>  | XXX-XXXXXXXXXXXXXXXXXXXXXXXXXXXXXXXXXXXX                              |            |               |                 |               |                    |             |
| <b>OmIntu</b>  | LER-YGLFSDLE                                                          | EKSFN      | TAHLPPIT      | NPLVDSN         | KGNDRNTI      | FERN               | -----       |
| <b>SrInL</b>   | FPGDHPLSM                                                             | EEHGLM     | FMTVGTAT      | WSSSSHD         | QQQ           | -----              |             |

|                |                                                                       |         |          |         |         |        |           |
|----------------|-----------------------------------------------------------------------|---------|----------|---------|---------|--------|-----------|
|                | 920                                                                   | 930     | 940      | 950     | 960     | 970    | 980       |
|                | .... .... .... .... .... .... .... .... .... .... .... .... .... .... |         |          |         |         |        |           |
| <b>MmIntu</b>  | ----TCRRTF--                                                          | FSDYSFK | ARKPSPSR | IGGGREP | -TEGEE  | -----  | SAGLSPHAT |
| <b>DrIntu</b>  | ----IGRSLF                                                            | GEAGTV  | GIRRRAS  | PQRSQ-- | SDSGSE  | GHA    | -----     |
| <b>DmIn</b>    |                                                                       |         |          |         |         |        |           |
| <b>SpIn</b>    |                                                                       |         |          |         |         |        |           |
| <b>LcIn</b>    | ----TSRKVL--                                                          | FGDTSR  | TRRPSPP  | RSSGSDT | GSEGHG  | EGG    | ----      |
| <b>SmIn</b>    | -----                                                                 | ALLEK   | GASSR    | KGLEGN  | LAERLDD | PEVERQ | HLISFM    |
| <b>ChIn</b>    | -----                                                                 |         |          |         |         |        |           |
| <b>TaIn</b>    | -----                                                                 | FLLR    | SPNLS    | LNVS    | RHKNP   | PNSPV  | VDRK      |
| <b>OspIntu</b> |                                                                       |         |          |         |         |        |           |
| <b>OcIntu</b>  |                                                                       |         |          |         |         |        |           |
| <b>OlIntu</b>  |                                                                       |         |          |         |         |        |           |
| <b>ScIntu</b>  |                                                                       |         |          |         |         |        |           |
| <b>EmIntu</b>  |                                                                       |         |          |         |         |        |           |
| <b>AqIntu</b>  |                                                                       |         |          |         |         |        |           |
| <b>AvIntu</b>  |                                                                       |         |          |         |         |        |           |
| <b>OmIntu</b>  |                                                                       |         |          |         |         |        |           |
| <b>SrInL</b>   |                                                                       |         |          |         |         |        |           |

|                |                                                                       |        |         |         |         |         |         |
|----------------|-----------------------------------------------------------------------|--------|---------|---------|---------|---------|---------|
|                | 990                                                                   | 1000   | 1010    | 1020    | 1030    | 1040    | 1050    |
|                | .... .... .... .... .... .... .... .... .... .... .... .... .... .... |        |         |         |         |         |         |
| <b>MmIntu</b>  | SEGS---DDN                                                            | VALLK  | LARKKST | LPNPFHL | GTSKKEL | SEKE-LE | VD--    |
| <b>DrIntu</b>  | SGGSDG                                                                | SLGSAG | FLKMPRL | KH--PN  | PFFYLG  | SLRKS   | LSERETE |
| <b>DmIn</b>    | TAEDSD                                                                | SGSDW  | ENFAVQ  | HPLHYG  | LN      | GAESH   | SQSQMTE |
| <b>SpIn</b>    | SDASIG                                                                | SVGSSE | IYRAV   | RRGR    | LIPDP   | PYMGV   | MQRAREE |
| <b>LcIn</b>    | SQGGSG                                                                | SEGGSG | SINKK   | HNL     | PNL     | FHLG    | NTKK    |
| <b>SmIn</b>    | SRSYST                                                                | STGST  | NGSQS   | SEYV    | NVQ     | LPKH    | GTASDT  |
| <b>ChIn</b>    | GMRERS                                                                | QSR    | TNSL    | SGNSS   | RHYS    | VHEMA   | PHFK    |
| <b>TaIn</b>    | SSQAR                                                                 | ERASS  | YGLHR   | ASPI    | VS      | RKNAI   | SANTAY  |
| <b>OspIntu</b> | -----                                                                 | SFSS   | SASAR   | HIAA    | INS     | DEMS    | RHKGR   |
| <b>OcIntu</b>  | -----                                                                 | SLLT   | TSR-    | HSL     | SVG     | DEDL    | ARHKK   |
| <b>OlIntu</b>  | -----                                                                 | LMSS   | GS-     | SSL     | VP      | SD      | DLGR    |
| <b>ScIntu</b>  | AGSPGL                                                                | SRAIF  | MQKA    | ALPP    | GP      | PASS    | GFRKS   |
| <b>EmIntu</b>  | SEDESS                                                                | PLGSR  | TASV    | SLFK    | FQK     | DL      | SLPSL   |
| <b>AqIntu</b>  | KGGGGG                                                                | GK     | HRM     | TRS     | TGS     | IY      | SL      |
| <b>AvIntu</b>  | RGRSGL                                                                | RLT    | SGD     | ST      | DSE     | GS      | NLTK    |
| <b>OmIntu</b>  | RSSRSL                                                                | RLT    | SGE     | ST      | DSD     | G       | STAT    |
| <b>SrInL</b>   | -----                                                                 | RQQQ   | HQ      | SR      | GGV     | SCN     | PAV     |

```

      1060      1070      1080      1090      1100      1110      1120
.....|.....|.....|.....|.....|.....|.....|.....|.....|.....|.....|.....|.....|
MmIntu  GIFITP-----THEEVAQLGGSVHSQLIKNEHQCCLSIRAFFQQTLLKEE-----KKKALSDEGEH
DrIntu  GIFIAP-----THTEIRHLSGSIHPQLIHNEHQCCLSIRQAFQQLPSTR-----DRRGPE----
DmIn    GSLFAP-----FTDSSSENSNYLSEIRQACHIIHAVLQKSKHYRR-----HLSESSRAQT
SpIn   GILITP-----TRSDLAFLGGVIHSQLVDNFEQCCVKVIRQQLTLHAHLR-----PKDQLSG---
LcIn   GIFISP-----THREVAQLSGSIHPQLIKNEHRCCLSIIRSFQQAPREK-----VKKSKNVLRIT
SmIn   GIFLAP-----VCDNADLFQGSVMKNILDTFHRCLNMRVTFHAHSLRNE-----KITKANITKK
ChIn   GV FVSP-----NAFKSSNMLTGEILTNYSACEKTHKWFEKKQLPPSE-----
TaIn   GMLISP-----TSRELASIDGALQRKIVTKFYWACAVIRNFTLSRQGG-----KKPEN
OspIntu GIIVAP-----TDAVLGQMSGSLHAEVVRNEHKACIAIRKVLKGRSIEX-----XXXXXX----
OcIntu  GVVVAP-----VQATPGQVSGHIIHTEIVRNEHKACISIRKVLKGGQ-----NGDKIY----
OlIntu  GIIVAP-----TEAVPGQFSGPIHAEVVRSEHKACIAIRKVLKSQSIKN-----DGNKVR----
ScIntu  GIMICPLVQHVRATAQSAASSPSIHGQLVRTFHRACITIREVLCRRCMQDQIDN----PFSRQNALRG
EmIntu  GVVVCP-----IHTIP---TGAVHKEVLECFAEVCGCIRQTLWRRRSGKMGEDDYFDGDDGEEEEEE
AqIntu  GLLVSP-----SNEQVSSQP--VHSQLLITFRETASAIHTILHQKRREE-----QEENVWEEEE
AvIntu  GIFLSP-----AFLKTPNLSQSIQKDLVLIHTYCLHIQEKFKRSKRYSKN-----FAKLNKRFKT
OmIntu  GIFLTP-----ALPKHSSSSHSIQKDLVYIHTACLIREQFKYSKNWSKN-----LAKLNKKFKN
SrInL  PPR-----

```

```

      1130      1140      1150      1160      1170      1180      1190
.....|.....|.....|.....|.....|.....|.....|.....|.....|.....|.....|.....|
MmIntu  SEPTNSVSSLS-----PVKEHGVLFECSE-----PENWTDQKKTPPVMSYVWVGRFLFL
DrIntu  ---RQSTAGLG-----PVKEHGVLFQCK-----PQNWTDQKKPAPTMYWVIGRMLL
DmIn   NSNGHSSHTVS-----LVKEHGMILEVSE-----TQPKSDGQSQSSTSSRFVWVGRLFQ
SpIn   -KTVLRCDALT-----VLREFGVSRFCH-----PENWPE-KKQPPSIKYWVWVGRLIK
LcIn   SRSGRSGGLGLG-----FVKEHGVLFECSE-----PENWTDQKKPPPTMYWVWVGRFLFL
SmIn   YGVNNFILTTY-----EQGILFHCN-----LKEPAKQKNSLSEFWIVGRLFF
ChIn   -----PLELGVLFDLQ-----LTKGAEEMKKGFPNIRYWVWVGRKMK
TaIn   VSPKFVKKSLN-----VYEQGILFTLSP-----ERVGGGGGKKLRKPLRYWVIG---
OspIntu -----XXXXXXXXX-----XXXXXXXXXXXXXXXXXXYWAVGRLVSE
OcIntu -----EHGTLFQYS-----AESHLDKTKS-TSLYWVWVGRLVQ
OlIntu -----EHGLLFHCP-----LTSHADRSKSVTTLAYWAIIGRVLH
ScIntu  VYEHGMLLQIN-----PAADKSMGRS-----TAGSDKQRSSIAVNYWVWVGRLFR
EmIntu  GHWQHVPVASSSTPPPSLKSPPCPTVIEQGVLLSCS-----MDQSSTNKHQAPSEFYWVWVGRLFP
AqIntu  EEEVSSVSSMKDSDGVFSLRGSSVIEHGVLVSCTTLSTRGGGVGGGAKNIHGSLANPILNYWIIIGRLE
AvIntu  SKSDDPEQSTG-----ELNECGFKFEWE-----IAGKSSKGQSTVIEFWVIGRRIF
OmIntu  YKSNDPPELTG-----EATESAFKFTWT-----VQAKSTKDNTILYFWVWVGRRIS
SrInL  -----GSNTDTRAQHHAGTFFGGGSRGV

```

Motif 1

Motif 2

Motif 3

```

      1210      1220
.....|.....|.....|.....|.....|.....|.....|.....|.....|.....|.....|.....|
MmIntu  NPK-PEELYVCFHDSVSEIAIEMAFKLLEGL---
DrIntu  EPV-PEEFYVCFHDSVAEVPVEMAFLRSEGLAV-
DmIn   SPA--PEVYVCHRSDVPQNIVEMAFLRSEFSMG-
SpIn   GPRGPEECYVCFHDSSTQNTIELAFLKLVG VGS-
LcIn   DPY-PEEFYVCFHESVTEMAVELAFLRSEGLST-
SmIn   NPE-PEEVYVCFHDSVQDDIVELIAFLRLEGLSL-
ChIn   KRNKCEVYVCFQDGTQPNVIEMAFKIRFGCHY-
TaIn   -----YHESISQNICVAHRIGFAWNK-
OspIntu YPV-EEEFYVCFQDSTGWNAEMAFAFRFAGAMV-
OcIntu  HPV-EEEFYVCFQDSVGWSAEMAFAFRFAGAMV-
OlIntu  ---EEEFYVCFQDSTGWSAEMAFAFRFAGAMV-
ScIntu  EPV-QEEFYVCFQDESMSQNAVELAFLKLEGAVT-
EmIntu  DTG--PEELYVCFVDNTSQNIIEMAFLRLEAGTTY-
AqIntu  ERE---LYICYQENMSQSSVELIFKLLFGSNIF
AvIntu  RPK-PEELYICYQDATPQSTVEMAFLKLLQSNII-
OmIntu  RPK-PEELYICYQDSTPQSTVEMAFLKLLQSNII-
SrInL  QDDMYPEELYVCFRDGAAQDTAEMAFLKLFSGL---

```

Abbreviations. Vertebrate: Dr, *Danio rerio*; Lc, *Latimeria chalumnae* and Mm, *Mus musculus*. Hexapoda: Dm, *Drosophila melanogaster*. Ambulacraria. Sp, *Strongylocentrotus purpuratus*. Cnidaria: Ch, *Clytia hemisphaerica*; Nv, *Nematostella vectensis*. Placozoa: Ta, *Trichoplax adhaerens*. Porifera: Aq, *Amphimedon queenslandica*; Av, *Aphrocalistes minuta*; Em, *Ephydatia muelleri*; Oc, *Oscarella carmela*; Ol, *Oscarella lobularis*; Om, *Oopsacas minuta*; Osp, *Oscarella sp.*; Sc, *Sycon ciliatum*. Ctenophora: Ml, *Mnemiopsis leidyi*. Choanoflagellata: Sr, *Salpingoeca rosetta*.

**Figure S2.4: Inversin alignment.** Threshold for shading has been fixed at 80% for both identity (black) and similarity (grey). The black square indicate the C-terminal sequence shared by Ambulacraria, Mollusca and poriferan Invs 1 while the red squares correspond to the four AAX9Y/F motifs.

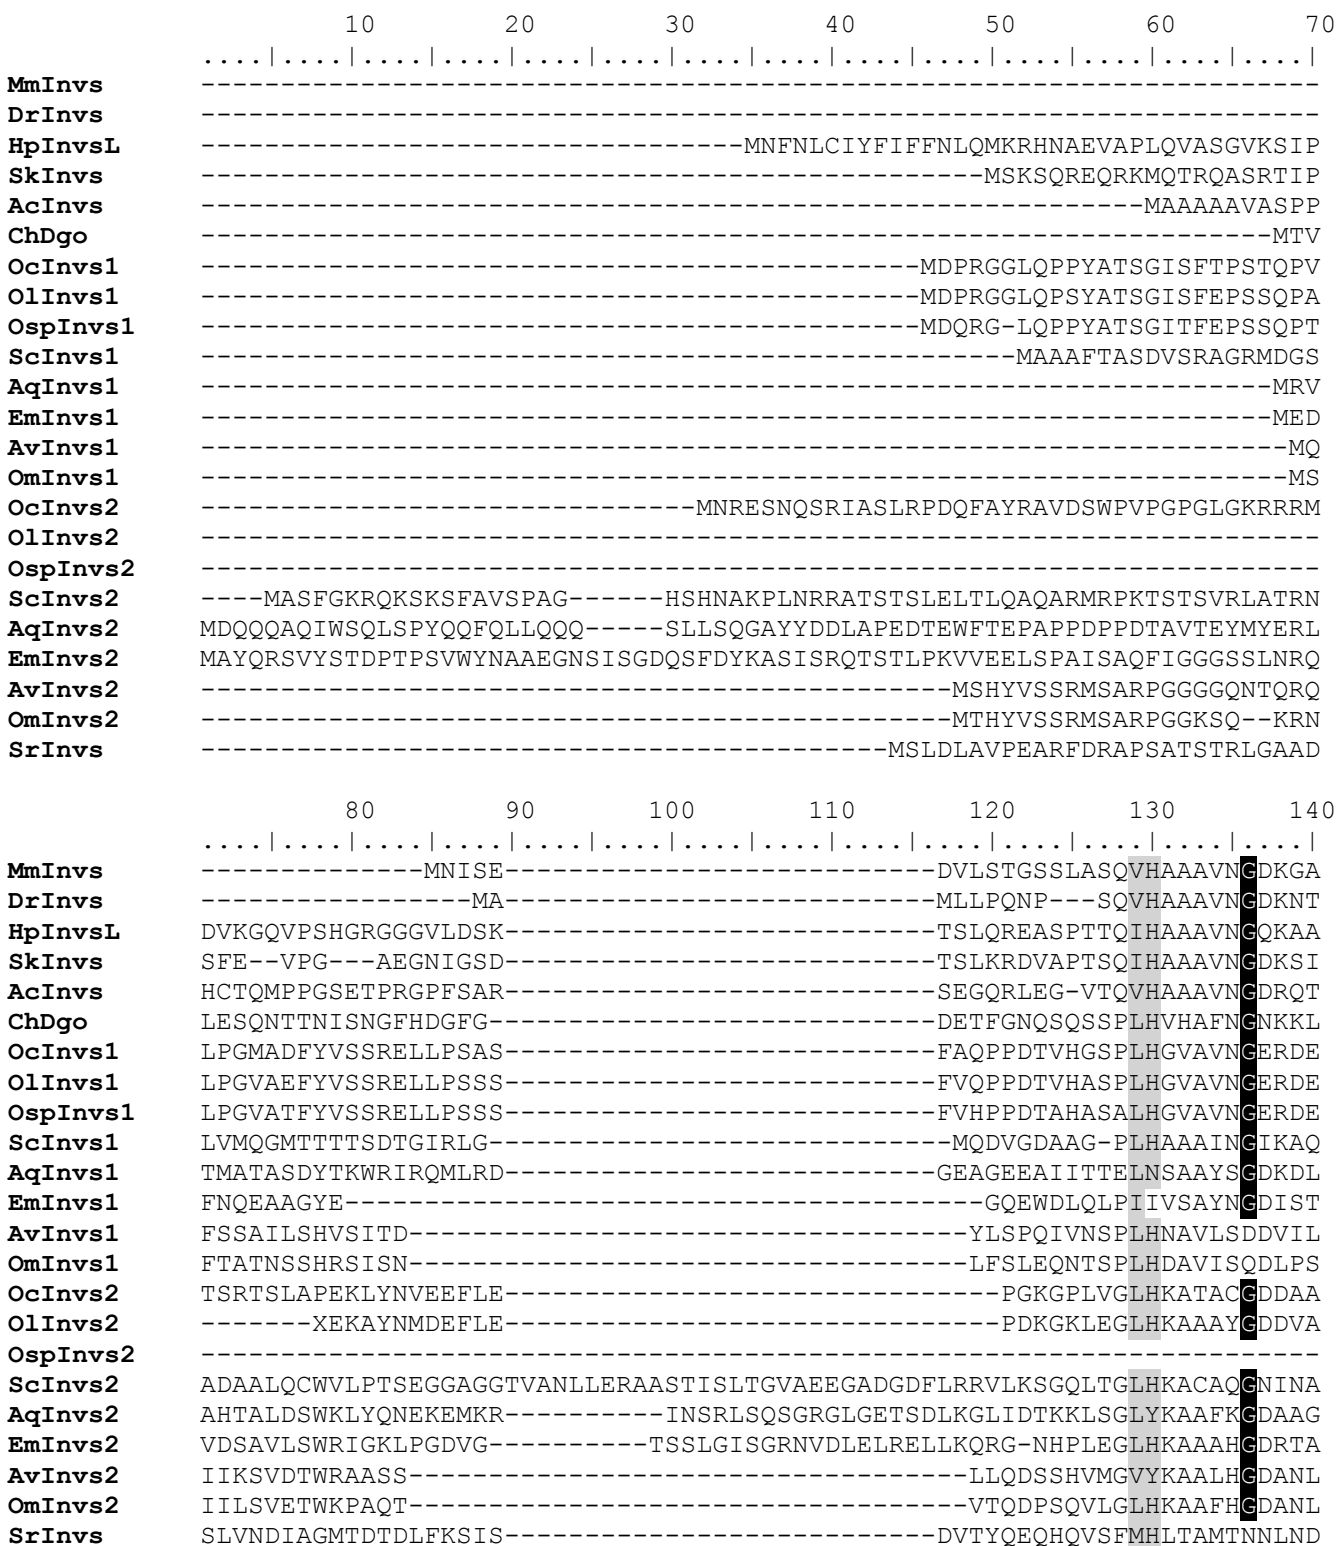



|                 | 150            | 160            | 170            | 180          | 190           | 200                | 210            |
|-----------------|----------------|----------------|----------------|--------------|---------------|--------------------|----------------|
| <b>MmInvs</b>   | LQRLIVGN-----  | SALRDKEDRFGRTP | PLMYCVLADRVDCA | DALLKAGADV   | NKTDHSRRTALH  | LAAQK              |                |
| <b>DrInvs</b>   | LHKLIT-E-----  | SALRDSQDFGRTP  | PLMYCVLADRDL   | CAEVLLKAGAG  | INKTDHSQRTAL  | HAAQK              |                |
| <b>HpInvsL</b>  | LQKLLKTY-----  | PKEVDQADQFGRTP | PLMFAVLADRDL   | CAEVLLKGANV  | DAKNDGGRTAL   | HWAATYK            |                |
| <b>SkInvs</b>   | LQKLLSAN-----  | PHQIDGQDFGRTP  | PLMFAVLADRLE   | CTEILLKAGAN  | VDAKDSGGRTA   | HWAHAK             |                |
| <b>AcInvs</b>   | LSRLLAGD-----  | YGDLEVGDQFGRS  | PLMYCVLADRLE   | CAEILLKAGA   | QVNLQDRGGRTAL | HWAHAK             |                |
| <b>ChDgo</b>    | LQDALQSK-----  | EYGVDDIDSTGRTP | LIYSVLVEQIDCF  | NLLKKGADID   | KPDTDGRTC     | LHWAAYQ            |                |
| <b>OcInvs1</b>  | LLDLIASA-----  | AYDLDCGDQFGRTP | LVYSVLGDRLD    | CAEILLKAGA   | QVNRADMGR     | TALHWAAYQ          |                |
| <b>OlInvs1</b>  | LLNLISSN-----  | AYDLDCGDQFGRTP | LVYSVLGDRLD    | CAEILLKAGA   | QVNRADMGR     | TALHWAAYQ          |                |
| <b>OspInvs1</b> | LLNLIASN-----  | AYDLDSGDQFGRTP | LVYCVLGDRLD    | CAEILLKAGA   | QVNRADMGR     | TALHWAAYQ          |                |
| <b>ScInvs1</b>  | LAGLLQSG-----  | AYDIESQNHQGTPL | IFSVLGDRLD     | CAELLVRYGAE  | IHVTDKEGRTP   | LHWAAYT            |                |
| <b>AqInvs1</b>  | LLALLKE-----   | HDIDECDEQGRTP  | PLMYASMVNQYD   | IVDILLKRRAS  | STIQDTLIGQT   | PLHAAASN           |                |
| <b>EmInvs1</b>  | LQQLLKS-----   | SPVDEPDSSGR    | TALMFAAMADR    | ADIDILLKAGAR | ISAQDINGQC    | SLHWATLN           |                |
| <b>AvInvs1</b>  | LKELISSK-----  | LYDVNISDDN     | GRTPLVYSIF     | FIGSFVCFDIL  | LNNGADLYSL    | LVQNMNPLHWACQI     |                |
| <b>OmInvs1</b>  | LRQLTSN-----   | SYDIDVLEDC     | GRTPLIYSIF     | VFGSFVCFEL   | LLQSGSNII     | YILDFDSKSP         | LHWACQL        |
| <b>OcInvs2</b>  | VMNIMKIEGER    | HHHIMYTGLDEL   | DVHGRSPLMY     | AVLSESLACME  | VILLEFGALRE   | QIDNGRSALHYAAFY    |                |
| <b>OlInvs2</b>  | IMNIMKIEGOR    | HHHIMYTGLDQ    | LDAYGRSPLMY    | AVLSESLACME  | VILLEFGALRE   | QIDVNGRSALHYAAFY   |                |
| <b>OspInvs2</b> | -----          | XRHIMYTGLDEL   | DAYGRSPLMY     | AVLSESLT     | CMEVILLEFGAL  | REQVDVSGRSALHYAAFY |                |
| <b>ScInvs2</b>  | VVSIVKIDSER    | QQLGYAGLSER    | DVFGRTPLMYA    | AAVADSKPCL   | DMLLTCGAKRE   | VRDPNGHTAVHYAAFY   |                |
| <b>AqInvs2</b>  | IMNIVKRDGR     | NAP-----       | LNELDKNGCT     | PLMYAALS     | SDSDSAIEM     | LLNLSVRREQVD       | AVGRTAVHYAAFF  |
| <b>EmInvs2</b>  | IIQMLKQIG      | PGD-----       | HVDILDDN       | CTPLMYAAI    | ADSWQAEM      | LLNFSAARREMT       | DTEGRTAVHYAAFF |
| <b>AvInvs2</b>  | LMHIVTAEGL     | HLL-----       | INQQDQLGIP     | PMIYATLS     | DNPAICIERIQ   | ELGGRKEVSDMY       | GRTSVHYAAFY    |
| <b>OmInvs2</b>  | FMHIVSVEGL     | HLM-----       | INQQDQFGIP     | PLIYATLS     | DNPSCIERIQ    | ELGAKKEVKDLY       | GRTSVHYAAFF    |
| <b>SrInvs</b>   | LQGLINQHP----- | DYVNAVDSLDR    | TPLYFAILAN     | QPKTCKLLID   | DAGALVDVQ     | DADGRTPGH          | WATFH          |

  

|                 | 220       | 230         | 240        | 250      | 260       | 270            | 280                 |                  |        |           |           |           |          |          |     |        |
|-----------------|-----------|-------------|------------|----------|-----------|----------------|---------------------|------------------|--------|-----------|-----------|-----------|----------|----------|-----|--------|
| <b>MmInvs</b>   | GNYRFMKLL | LLTRRANWMQK | DLEEMTPLHL | STRHRS   | PKCLALLK  | FMAP--GEVDTQ   | DKNKQTALHWSAYY      |                  |        |           |           |           |          |          |     |        |
| <b>DrInvs</b>   | GNVRFMKLL | LLSRHADWRLK | DLEEMTPLHL | ASRHSS   | SKPLSILL  | LKHMAL--GEVDTQ | DRNKQTALHWSAFY      |                  |        |           |           |           |          |          |     |        |
| <b>HpInvsL</b>  | GVFRLCKLL | LVSKGAYWREK | DNESQTC    | LHFATRHK | DTRCLALIM | KQLLP--GEVDEQ  | DNSKRTALHWSASY      |                  |        |           |           |           |          |          |     |        |
| <b>SkInvs</b>   | GHFCKLKL  | LLISKGANCKE | KDSEGTALHL | STRHKNTK | CLALLMKQ  | LHVDLGEVDEQ    | DSAKRTALHWSASY      |                  |        |           |           |           |          |          |     |        |
| <b>AcInvs</b>   | GNLRFMKLL | LLSRGADCREK | DNEGOTGL   | HLCTRHK  | LPKCMALL  | LRQLTP--GEIDDO | DKNKRTALHWAASY      |                  |        |           |           |           |          |          |     |        |
| <b>ChDgo</b>    | GNHKLVL   | LVLSKCKN    | RTSRDKEG   | OTPLHLAI | SHDNLR    | VMQIILKHLN--E  | HEVDATDNRG          | MALCWSAHY        |        |           |           |           |          |          |     |        |
| <b>OcInvs1</b>  | DNYRCLRML | LLSKGANWK   | KADNEGR    | TALHMATG | HTSCKCLKE | LLKMKHGS       | REVNDSNEKMTALHWSAYN |                  |        |           |           |           |          |          |     |        |
| <b>OlInvs1</b>  | DNYRCLRML | LLMKGANWK   | KADNEGR    | TALHMATG | HTSCKCLRE | LLKMKQGS       | REVNDSNEKMTALHWSAYN |                  |        |           |           |           |          |          |     |        |
| <b>OspInvs1</b> | DNYRCLRML | LIAGKANWK   | KADNEGR    | TALHMATG | HINCKCLRE | LLKMKQGS       | REVNDSNEKMTALHWSAYN |                  |        |           |           |           |          |          |     |        |
| <b>ScInvs1</b>  | NNAKIAKFL | LLGKGASIRE  | KDLDCRS    | PLHLATSH | KSCKCLKE  | LLRRSK--AAD    | NEGDNEKMTALHWA      | AFH              |        |           |           |           |          |          |     |        |
| <b>AqInvs1</b>  | NAFECLKL  | LLARSATE    | LNKDM      | GRTPHL   | LSSAKSNL  | RCLDFLIR       | KLR--SSELNEG        | DNEKMTALHWCAYN   |        |           |           |           |          |          |     |        |
| <b>EmInvs1</b>  | GHYKSLK   | LMLAQSLD    | ICIKD      | HGRTPHL  | LSTTQL    | SSKCLALL       | VRKLR--SHEL         | NADNEKMTALHWSAYN |        |           |           |           |          |          |     |        |
| <b>AvInvs1</b>  | GLPKIVK   | ALIANNCD    | LYQKDAQ    | GRIP     | PLHYTT    | LHHD           | PKVIHILIKR          | MNR--SSIDEG      | DSLGM  | SALHWAAYH |           |           |          |          |     |        |
| <b>OmInvs1</b>  | GRLRIVK   | YLLISK      | GCDIYQ     | KSDCRT   | ALHHA     | TVQHLP         | KLISML              | KNYDQ--SLID      | QPD    | SLGM      | SALHWSAYY |           |          |          |     |        |
| <b>OcInvs2</b>  | GRHRALQ   | YLLDKAT     | NVMARD     | KFGRTAL  | HWAAMI    | SNPKCL         | SVLIQYAL            | AHRLG            | VDWL   | DEHVT     | PLHVAAQF  |           |          |          |     |        |
| <b>OlInvs2</b>  | GRSRALQ   | YLLDKAAN    | VTDAR      | DAFGRTAL | HWAAMIN   | NPKCL          | SLLIQYAT            | GHH              | LGLD   | WDT       | DEQV      | IPHVAAQF  |          |          |     |        |
| <b>OspInvs2</b> | GRCRALQ   | YLLDKAAN    | VMDAR      | VFGRTV   | LHWAAMI   | SHPKCL         | SLLIQY              | SAFHS            | LGLD   | WDV       | DKEQ      | VTPHVAAQF |          |          |     |        |
| <b>ScInvs2</b>  | GQHRALK   | FLIEAAC     | DWAPH      | DIYGR    | PPLHIS    | ISSDS          | VKCLQL              | LLKHCS           | VVGD   | VLD       | V         | DKEAM     | TALHVAHC |          |     |        |
| <b>AqInvs2</b>  | GKAKSLK   | FLIESG      | DWTP       | PRDAY    | GRTP      | LHWATA         | SKNTK               | CLLTL            | LN     | YASIV     | NGNIN     | QDNE      | GMTPLHCA | AAQF     |     |        |
| <b>EmInvs2</b>  | GKYNTL    | KFLISS      | SASAW      | PRDSY    | GRTP      | LHWCAN         | GSTK                | CLQV             | LLNHAK | VVY       | G         | DIN       | PKDNE    | GMTPLHCA | ALF |        |
| <b>AvInvs2</b>  | SKMKALK   | YLLQSAS     | DWSS       | IDLY     | GRTP      | LHWACAS        | KS                  | VKSL             | REF    | LEYAN     | SVY       | QTEY      | VD       | FERT     | PV  | FVAVQF |
| <b>OmInvs2</b>  | NKLKSLK   | YLLQ        | TASDW      | SCIDAF   | GRTP      | LHWCAN         | SVKAL               | KQL              | LLN    | YAN       | SVL       | GQTEY     | ID       | FEGT     | PV  | FVAVQY |
| <b>SrInvs</b>   | GCPECLD   | VLLAAGAT    | PDVR       | DKDGR    | TMLHWA    | TAAQ           | QIKCL               | QHLK             | QD---  | LDL       | TRD       | SEEM      | TPLH     | WAC      | FH  |        |

|                 | 290                                                                      | 300                                                                     | 310 | 320 | 330 | 340 | 350 |
|-----------------|--------------------------------------------------------------------------|-------------------------------------------------------------------------|-----|-----|-----|-----|-----|
| <b>MmInvs</b>   | .... .... .... .... .... .... .... .... .... .... .... .... ....         | NNPEHAKLLIKHDSNIGIPDVEGKIPLHWAANH-KDPSAVHTVRCILDAAPTESLLNWQDYEGRTPLHFA  |     |     |     |     |     |
| <b>DrInvs</b>   |                                                                          | NHPEHVKLLIKHDSNIGIPDSEGKIPLHWAANH-KHPNATRTRVRCILEAAPTESLLNWQDYEGRTPLHFA |     |     |     |     |     |
| <b>HpInvsL</b>  |                                                                          | GNEEAVRMLVKHSSNIGIPDTEGKTPHWAANAGDSPTAINTVQHILETEP--SVVNWQDYEGRTALHHLA  |     |     |     |     |     |
| <b>SkInvs</b>   |                                                                          | GNEEAVRMLIKQDSNIGIPDTEGKTPHWAATAGQDSSAVNTVKLLLESAP--SVINWQDYEGRTALHHLT  |     |     |     |     |     |
| <b>AcInvs</b>   |                                                                          | GNLEHVKMLIKQGSNIGIPDTEGKTPHWAASS--RDPDAVSCVLLILETTP--SVINWQDYEGRTALHHLA |     |     |     |     |     |
| <b>ChDgo</b>    |                                                                          | ERIEHVELLRLRYGSDVHVLDNERRGILHWTSON----KDPVLIKRLLEKGC--KGLGFPDQKGRTVLHMA |     |     |     |     |     |
| <b>OcInvs1</b>  |                                                                          | NNPEAIKLLIKAGADIVLPDVEGKTALHWTAGN----DSGTSVKAILELSP--AVINLQDNEGRAVLHHLA |     |     |     |     |     |
| <b>OlInvs1</b>  |                                                                          | NNPEAIRFLIKAGADIVLPDVEGKTALHWTAGN----NDGASVRAILEISP--AVINLQDNEGRAALHHLA |     |     |     |     |     |
| <b>OspInvs1</b> |                                                                          | NNPEAVKFLIKAGADILLPDVEGKTALHWTAGN----NDGASVKAILELAP--AVINLQDNEGRALHHLA  |     |     |     |     |     |
| <b>ScInvs1</b>  |                                                                          | GNIEAVKLLFRNEADLTVSDVEGKTALHWTAAAN----EDPTCKALLEHEFP--AINIADTEGRTTLHHLA |     |     |     |     |     |
| <b>AqInvs1</b>  |                                                                          | NNSEGVRKLLQSGADIVLTDIDGKTGLHWTASN----EDDSTIKVLLDKAP--TAINLKDKDERTVLHLS  |     |     |     |     |     |
| <b>EmInvs1</b>  |                                                                          | GAAENVRLLLKAGADIVVTDIDGKTALHWTANN----PDDSTVKVILELAP--AAINLRDNEGRALHHLA  |     |     |     |     |     |
| <b>AvInvs1</b>  |                                                                          | NNHSACRFLIRNHSNPGNTDNEGRTPHLHCSGN----KNIMSIKVLVELAG--STLLTLQDFQGCTLLHHI |     |     |     |     |     |
| <b>OmInvs1</b>  |                                                                          | NNSEACRMLIRNRSIPSSVDNEGRTPHLCAGN----DDCSSIKVFLEFAG--QTIINLQDSQGCTLLHHI  |     |     |     |     |     |
| <b>OcInvs2</b>  |                                                                          | NREKHVVMLIKAGARCEIIDSTGOTALHYCLGN----ANVDCIQTLCSAYP--SVINAKDGGGATLLHWA  |     |     |     |     |     |
| <b>OlInvs2</b>  |                                                                          | NRERNVALLMKAGARCDVDMTGOTALHYCLGN----TNVDCINTICSGHP--AINVKDGGGATLLHWA    |     |     |     |     |     |
| <b>OspInvs2</b> |                                                                          | SRDKHVAMLMKAGACDCIDVTGOTALHYCLAN----MNADCLNTICSGHP--AINAKDGGGATLLHWA    |     |     |     |     |     |
| <b>ScInvs2</b>  |                                                                          | GKAQHLSTLLKAGASPKAVDMEGKTAMHWAVTN----TDATCITTLHQAYP--AIVNMRDIYSETVLHVA  |     |     |     |     |     |
| <b>AqInvs2</b>  |                                                                          | GSAKHITLMIEANCDFSLVDIERKTVLHWAVEN----KDMSSLHAIVNHS--YLLNRQDINGQTLHHS    |     |     |     |     |     |
| <b>EmInvs2</b>  |                                                                          | GRPKHISLLNEAECSLVAVDIEGKTALHWTANN----SDPSCVLALMEAYP--PLINRRDVYGCIVLHLM  |     |     |     |     |     |
| <b>AvInvs2</b>  |                                                                          | CNTQHIEILLAKEGHNFLOEDIEGKTAFHWTVDN----PNTNCVESLLKFQP--ELINKODGEGKTLHHA  |     |     |     |     |     |
| <b>OmInvs2</b>  |                                                                          | SHAQHIELLTREGHNLLQEDIQGKTAFHWTVDN----PSTDCIDALLSSQP--DLLINEODGEGKTLHHA  |     |     |     |     |     |
| <b>SrInvs</b>   |                                                                          | NHAKHVQLLLNAKADITAVDMEGKTALHWTSGN----KDAAVVKVLLASKP--ELANQGDNEGRTPHLHC  |     |     |     |     |     |
|                 | 360                                                                      | 370                                                                     | 380 | 390 | 400 | 410 | 420 |
|                 | .... .... .... .... .... .... .... .... .... .... .... .... ....         |                                                                         |     |     |     |     |     |
| <b>MmInvs</b>   | VADGNLTVVD-----VLTSYESCNIITSYDNLFRTPHWAALLGHAQIVHLLERNKSGTIPSDSQGATP     |                                                                         |     |     |     |     |     |
| <b>DrInvs</b>   | VADGNEAVVE-----VLTSYEGCSVTAYDNLFRTPHWAALLGHAKIVHLLERNKSGMI PSDSQGATP     |                                                                         |     |     |     |     |     |
| <b>HpInvsL</b>  | VANGNAAIVQRL--VDFQTPLVKCNISVLDNMFRTPLHWAAVLGHTHMVNMLLDKN--ANYSCSDSNGATP  |                                                                         |     |     |     |     |     |
| <b>SkInvs</b>   | VADGNEPIVG-----ALTSLEKCNVTALDNMFRTPLHWAAVLGHTKIVQILLNRK--ADYASTDSNGATP   |                                                                         |     |     |     |     |     |
| <b>AcInvs</b>   | VADGNESVVI-----MLTSVENCNVSALDNVFRTPHWAAVLGHSKIVAMLLKSG--ADSSSSDSNGATA    |                                                                         |     |     |     |     |     |
| <b>ChDgo</b>    | VGQGNQAIIE-----YLLTISDIPVNTQDEIQRTPLHWAAVLGHATAIVEILLNSG--ADYSLADNNGVRP  |                                                                         |     |     |     |     |     |
| <b>OcInvs1</b>  | VAEGNEKTVG----ALTSMPGVKCDVISRDHMFRTPLHWAAVLGHTHIVGILLERH--ADYASADGNGATA  |                                                                         |     |     |     |     |     |
| <b>OlInvs1</b>  | VAEGNENTVG----ALTSVPGVKCDVTSRDHMFRTPLHWAAVLGHTHIVGILLERN--ADFSSTDGNGATA  |                                                                         |     |     |     |     |     |
| <b>OspInvs1</b> | VAEGNENTVG----ALTSVPGVKCDVSSRDHMFRTSLHWAAVLGHTHIVGILLERN--ADYASTDGNGATP  |                                                                         |     |     |     |     |     |
| <b>ScInvs1</b>  | VAESNYIIVD----TLTSMPNIKCKVSAADRMFRTALHWAAVLGHSDIAGLLDRG--ADPSAADSTGATP   |                                                                         |     |     |     |     |     |
| <b>AqInvs1</b>  | VAAGNATVIM----TLLNSSSVRCDVMAVDSDFRTPLHWAAVLGLSQIVGILMENG--ADPTAVDATGATP  |                                                                         |     |     |     |     |     |
| <b>EmInvs1</b>  | VATGNVAVVE----ALISAQGVKCHLSAADLQFRTPLHWASVIGLPELVRVIMDKG--ADPRCADAVGATP  |                                                                         |     |     |     |     |     |
| <b>AvInvs1</b>  | VAFENFSLLSALTDSTNFTEIKALKLDSKDLQHRTPHWAFAFGYATIADILLTLG--ANFEIFDGNNGYLP  |                                                                         |     |     |     |     |     |
| <b>OmInvs1</b>  | VAIQNVSLSTITNPQNSSWLMNLDLSDKDLQHRTPHWAFAFGSSVIAGILLISRG--ADWKVIDDNGYLP   |                                                                         |     |     |     |     |     |
| <b>OcInvs2</b>  | SAHGHAHIVA-----VLVSFDGCDNESRDQWSTPAHYTCLYGNANCLQILLARG--AHDYATDINGLTC    |                                                                         |     |     |     |     |     |
| <b>OlInvs2</b>  | SGHGQAHIVA-----ALVSFDGCDIESRDQWSTPAHYACLYGNANCLRILLAH--AHDYATDINGLTC     |                                                                         |     |     |     |     |     |
| <b>OspInvs2</b> | SAHGHAHIVA-----ALVAYDGDIESLDKCGCTPAHYACLYGNANCLRILLAHN--ARDYATDVNGLTC    |                                                                         |     |     |     |     |     |
| <b>ScInvs2</b>  | SKLGYAHIVD-----AVCSMENCMDTKCRDDQSALHLATIHCONSCVSTLLRHG--ALDACVDSFGLSP    |                                                                         |     |     |     |     |     |
| <b>AqInvs2</b>  | SKKGNGLPVE-----RLLNIDGIEIDTRDKQDCTPLLLATMEGHSNVVDYLLDFH--ALDSCIDASGLTA   |                                                                         |     |     |     |     |     |
| <b>EmInvs2</b>  | AANGSLPLMD-----TLLRIEGVEVNAQDSTQRTPLHYACLGGHAEVASMILQWG--GLDRMVDIEGATP   |                                                                         |     |     |     |     |     |
| <b>AvInvs2</b>  | CEYNLSHIAY-----NLLINQGILIDLDSNGRTPLHSTAISGSPNLTEALLSQK--ALDSVFDANLTA     |                                                                         |     |     |     |     |     |
| <b>OmInvs2</b>  | CEYKLSHIVF-----YLLHQDGLLDARDLSSRSSLHYAASGSAVLVEALLSRK--ALDSIFDMEGLTP     |                                                                         |     |     |     |     |     |
| <b>SrInvs</b>   | VGDASKAIAQ-----AILKSAKTDP TLVDHTGRTPALHWAVALANDTMIGVLAKHR--DSVRVQDEQGATP |                                                                         |     |     |     |     |     |

```

          430          440          450          460          470          480          490
.....|.....|.....|.....|.....|.....|.....|.....|.....|.....|.....|.....|.....|
MmInvs  LHYYAQSNFAETVK-VFLQHPVSKDDS--DLEGRTSFMWAAGKGNDDVLRMTLSLK-SDIDINMSDKY-G
DrInvs  LHYYGAQSNFADTVA-VFLKHHSVRDEP--DLEGRTAFMWAAGKGSNDVIKIMLDLK-KDIDINMTDKY-G
HpInvsL LHYYAQNNHTETVE-VFLQREGITDEP--DLEGRSALMWAAGKGADGVIEVMMRYK---QDINATDKT-G
SkInvs  MHYAAQNNYAETVD-AFLSRENVTDPE--DLEGRTALMWAAGKGADDVIRTILKRN---SDINATDKT-G
AcInvs  LHYYAQNNFSDTVS-VFLSN-QCTDEA--DLEGRTAFMWAAGKGADDVIRVFLEQG---VDIHQEDKT-G
ChDgo   LHYYAVQNNHRDVVA-TMIRTGRVTDEP--DKDQRTALMWAALKGHMNVLVKVLGGK--NVNINAVGIN-K
OcInvs1 LHYYAQNNFGETVA-TMLSFPVHRDVH--DNDGQTALMWAAGKGSYEVVRTMMER---KLDVHACDKQ-G
OlInvs1 LHYYAQNNFGETVA-TMLSFPQVKDLH--DNDGQTALMWAAGKGSYEVVRTMMER---KLDVHACDNQ-G
OspInvs1 LHYYAQNNFGETVA-TMLSFSQIKDLH--DNDGQTALMWAAGKGSYEVVRTMMER---KLDVHACDNQ-G
ScInvs1 LHYYAQNNFATTVA-TFLTFDHVQDTP--DDEGRTSLMWAAGQGSYDVIRMTLER---KMNVNAAQDQT-G
AqInvs1 LRYQAMKDHEDETVE-VLLSFN-SDDIP--DNEGRTALMWAAEKGYNIIVKMIER---KVEINAQDNQ-G
EmInvs1 LHYSAQKDHVDCVA-ALLSYNGVQDIS--DAEGRTALMWAQKGNASCIRAMLEM--TIDLHVRDQL-G
AvInvs1 LHYYAVERNFVDCID-CFFSHKNVADLP--DKGNRTSLMLSCQIGHFESTRAILERN--IISIDYSTSVTG
OmInvs1 LHYYAIERNFIDCID-CYFTFDFTDDLE--DNNGRTCMLMLSCQLGHHESTRAILERR--ISGVNGFSKNG
OcInvs2 LHYYAVQENHLDCIH-LLVSLPLASNLP--DSEGHRLPTWAAALGHHNAIKSLLQNSNFIGTIDQEEEE-G
OlInvs2 LHYYAVQENHLDCIH-LLVSSPVASNLP--DSEGHRLPTWAAALGNHNAIKSLLQNSIFVSAIDQEEEE-G
OspInvs2 LHYYAVQENHLDCIH-LLTSSPVASNLP--DSEGHRLPTWAAALGNHNAIESLLQNAAFVGVADHEEEEE-G
ScInvs2 LHYYAIMSGSVDVVR-LYAQLESANLP--DSDGRRPLHWAVTEDNAEMLALLLEHPDMQADVNIEDKR-G
AqInvs2 LHYYAVQINSVNCVK-LLVENEHATHIPANEQGLLEPLSLAAIFGFSDIIKALLVNPHIANDINRTDSN-R
EmInvs2 LHCAVMGSGASTVRSLLSLLPEPTYIP--DQSGNTPLTLAAQYDSAEVLNVLLSSDELKKHINQIDSN-G
AvInvs2 LHYYAVLYKHVQCVN-MFTLQDNMSHLP--DNEFKTPLMYAACISEVPILNALLSRPEICAQINAQDKQDN
OmInvs2 LHYYAVQQQHVECVR-VFLLQNSPSHLP--DHDFRTPMLYASVLDNIAIVNALLNHPEVRIHINAIDKQEN
SrInvs  VHYYAQLDSEPCTKALLKSMKMDVDVE--DREQRTALFWAIKADHLSTAEALLKAG---ANPNHVDST-G

```

```

          500          510          520          530          540          550          560
.....|.....|.....|.....|.....|.....|.....|.....|.....|.....|.....|.....|.....|
MmInvs  GTALHAAAALSGHVSTVKLLLLDNDAAQVDATDVMKHTPLFRACEMGHRDVIQTLLIKGGARVDLVD--QDGH
DrInvs  GTALHAAAALSGHVSTVRLLELQGGMVDPLDVMKHTPLFRACEMGHRDVIQLTLIKGGARVDLVD--IDGH
HpInvsL ATALHAAAMSGHASTVEVLLQHGAAVNVVDQTKHTPLFRAAEMGHTEVMKTLAKGGAQVKVVD--QEGR
SkInvs  GTGKHKNAISSNNKSFSLLXHGAAHVNACDMMKHTPLFRACEMGHLEVVKTLMDGGAKVNIAD--QDGR
AcInvs  DTALHAAAALSGHSTTVQLLNSGARLEGMDQAKHTPLFRACEMGQMDVVQTLIEYRARVDILD--QDGR
ChDgo   QTALHMSCQTGNLECVQLLIQHKADVNMMDQQQHTPLFYACASGHGQIVTKLLQDDQRNLHQCDLEGR
OcInvs1 GTALHGAAYAGHANIARLLQHGAPLNALDARNHTPLFRSCEMGHTEVAVTLIQGGAQVDIVD--VDGR
OlInvs1 GTALHAAAYAGHANIARVLLQHGAPVNTLDSRNHTPLFRACEMGHTEGVVTLIQGGAQVDIVD--VDGR
OspInvs1 GTALHAASYAGHANIARVLLIQHGSPVNSLDSRNHTPLFRACEMGHTEVVVTLIQGGAQVDIVD--VDGR
ScInvs1 GTALHAASYAGHTNCVRILLQHGAKVNSADQLGHTALFRACETGQLDVVLTLLQAGARVNLAD--VDGR
AqInvs1 ATALHLAAYSCHSDICQLFIQHNADINATDINGHSPLFRACECGHNPVVLTLLIQHKALVDLID--NEGR
EmInvs1 ATALHAAALNGSAECVQLLLQHGADVNAQDSNSLTPLLRACERGNTEAVVMLNGGASVELRD--TIERT
AvInvs1 LTALHYAALGGNLLCLKLLKYGAEINAKDIHGRTPLSYASERGYSESVKFLYSSGGAIDISS--NDGRI
OmInvs1 MSALHFASIGGNINCLKLLQYGALVDMQDNHLRTSLSYACEYGYAFIVEYLLINSGGGLIDLPS--IDGRL
OcInvs2 RTALHIASINGYSLCVRVLLLESGAHIDAQDIYGSTAFHLAATQPHVKCMQELISHGADVLLRD--GNGQT
OlInvs2 RTALHVASLNHALCVKTLLENGAHIDVTDAYGCSLHLAASQSHINCIQELIAYGADVLFACD--ANGQS
OspInvs2 RTALHVASLNHALCVKTLLENGAHIDVTDAYGCSLHLAASQSHDDCIQELIAYGADVLFACD--ANGQS
ScInvs2 MTAHLAVENGSTDCLSELLNANATVKNRSSEVESPVFVACETGKAQCLELIMRSGCNPNLGS--FEGLP
AqInvs2 LTAMHYACEGGFFDCVVTLQHGSDPNQLNENITPLDIVCENGFYICIGPLINGGAEAEERIG--NDGCS
EmInvs2 RTALYFACYAGAADCVTSLISNGADPNICDAFQQTPLFPACESGHGACIHALAKGGCDINTRD--GDGHA
AvInvs2 TCLLHVVITTSVDAMRVLLNAGADPNVLSQGYNALHICCOMNYVESAILLIDSRASVLIIPDR-NELLS
OmInvs2 SSSLNNTLLATQSIETMRILLKSGADANIINATGYNALHICQTNNEIAILLIDSGASILIPDK-NEKLP
SrInvs  RTILHISALSGLKLGAVKLLTKYKADKEIQDSAQQTPLFIACENGFADLVSYLLDNKANDAIID--AEGRN

```

|                 | 570               | 580              | 590            | 600             | 610                | 620               | 630             |
|-----------------|-------------------|------------------|----------------|-----------------|--------------------|-------------------|-----------------|
| <b>MmInvs</b>   | LLHWAALGGNADVCQIL | IENK-INPNVQDYAGR | PLQCAAYGGYINCM | AVLMENN---ADPNI | QDKEGRT            |                   |                 |
| <b>DrInvs</b>   | ALHWAALGGNAEVC    | EVLMEENG-ISP     | NLQDQAGRTPLQ   | CAAYAGYINCM     | ALLIQHD---ADPNI    | QDKEGRT           |                 |
| <b>HpInvsL</b>  | PLHWAALGGHTCV     | CYHLMTHD-ISP     | NVQDNAGRTP     | LQCAAYGGFIR     | CMTLLLEHG---ADP    | NLQDNEGMT         |                 |
| <b>SkInvs</b>   | PLHWAALGGHAVI     | CETLMKHG-IS      | VQDVRDHVGR     | PLQCAAYGGYIN    | CMSLMENG---ADP     | NLQDHEGMT         |                 |
| <b>AcInvs</b>   | PLHWAALGGHAYI     | CQMLIKYG-V       | HPNIRDNSART    | PLHCAAYGGF      | VNCMSALMEHG---AEP  | NSQDKEGMT         |                 |
| <b>ChDgo</b>    | PLHYSAMVDRREI     | VNNLLQHG-L       | DPNAQDNSGCP    | PLHIAAYGGN      | VHCMNVLENN---A     | QVNMQDNSGST       |                 |
| <b>OcInvs1</b>  | PLHWAALGGHAYI     | CLSLIQNG-ST      | VDVKDKEGRSP    | LECASYS         | CFVNCMAVLENG---CDV | NTRDNEGIT         |                 |
| <b>OlInvs1</b>  | PLHWAALGGHAYI     | CLSLIQNG-ST      | VDVKDKEGRSP    | LECASYS         | CFVNCMAVLENG---CDV | NTRDNEGIT         |                 |
| <b>OspInvs1</b> | PLHWAALGGHAYI     | CLSLIQNG-AT      | VNIKDKEGRSS    | LECSSYGGF       | VNCMAVLENG---CDV   | NTRDNEGIT         |                 |
| <b>ScInvs1</b>  | PIHWSCLGGHDQ      | VCTALIQSG-CD     | VNSPDTSER      | PLQCAAHGGH      | MTCVSI             | LES               | ---ADPNKQDIEGIS |
| <b>AqInvs1</b>  | CLHWAASGGHEF      | IVTTLIHSG-L      | PVDIILDNEN     | RSSLHCAAYNG     | SVGCCSELINAN---AF  | INQTDKDGVT        |                 |
| <b>EmInvs1</b>  | SLHWAASGGHTT      | LCTLFHQG-L       | PVDVADQGG      | RTPLHCAAYGG     | FSECVSVLLGLG---ADV | NLQDNEGIS         |                 |
| <b>AvInvs1</b>  | PLHYAALAHNLAT     | NDFIISHS-SV      | LSPKDDFGRI     | PFHYAASCDNI     | IALKLLGIDA-----I   | NFQDKTGYS         |                 |
| <b>OmInvs1</b>  | PIHYAALTNSC       | STIAFLISKG-N     | QLNTPDQMG      | RIPLHYACTL      | DNVELITMLG         | FAQ-----INS       | QDLSGFT         |
| <b>OcInvs2</b>  | VLHCAVRSRFVA      | AVECILQNSSI      | DVDGIDN        | ISSP            | PLHYATAEGLT        | DVVTCLVTGG---ADP  | TLLGLDGLS       |
| <b>OlInvs2</b>  | VLHYAVHSRSVA      | AVELILQTN-V      | NVDGVD         | SINSSP          | PLHYATTENL         | TDIVTCLVRYG---ADP | PALLGVDGLS      |
| <b>OspInvs2</b> | LLHYAVHSRSV       | SMVELVLQAD-I     | HVDGVD         | SINSSP          | PLHYATAEGLT        | DIVACLVKYG---ADP  | TRLGLDGLS       |
| <b>ScInvs2</b>  | CLHAIILGQHTAS     | LKVLLSYS-AD      | ANVYDAEGT      | SALQAAAFSGY     | QAAVTELLN---GAR    | PDDQGSGLT         |                 |
| <b>AqInvs2</b>  | VLHKAILLSENSE     | ILKALINAN-C      | NAEVPDSNG      | RTPLELSVYI      | GNKDI              | TALLQSS---NAD     | PNAMDAYGLT      |
| <b>EmInvs2</b>  | PLHKATLNGQLD      | SVRALVISG-AD     | LNLYDSGGNT     | ALHMAAFG        | MEAILAVL           | VEN---RVD         | PNLQDPSGMT      |
| <b>AvInvs2</b>  | PLHIAVRHSSK       | DVLAFLALQT-EC    | VNLVTQDGL      | NALHFAAQMG      | DKVLEILLNS         | PLSSTLINAVD       | STGLS           |
| <b>OmInvs2</b>  | PLHMAVRHSSF       | DVVALAVQP-L      | CVNLVTQD       | GLNALHFAAQ      | LGEVTLVEILLNS      | PLKSSLLNAV        | DAAGLA          |
| <b>SrInvs</b>   | IVHAAAISGN        | KNVLAECLQL       | RPHDMNSVDER    | GETPVHYAAY      | FGQFDCVQ           | ELLSSG---AEP      | NCFDLEGVT       |

  

|                 | 640    | 650         | 660         | 670       | 680        | 690            | 700                                     |                                             |                                 |              |        |            |           |                    |   |         |    |    |   |     |   |   |   |   |   |   |   |   |   |   |   |   |   |   |   |   |   |   |   |   |   |   |   |   |   |   |   |   |   |   |   |   |   |   |   |   |   |   |   |   |
|-----------------|--------|-------------|-------------|-----------|------------|----------------|-----------------------------------------|---------------------------------------------|---------------------------------|--------------|--------|------------|-----------|--------------------|---|---------|----|----|---|-----|---|---|---|---|---|---|---|---|---|---|---|---|---|---|---|---|---|---|---|---|---|---|---|---|---|---|---|---|---|---|---|---|---|---|---|---|---|---|---|---|
| <b>MmInvs</b>   | ALHWS  | CNNGYLDAIKL | LLDFA-AFP   | NQ        | MENNEERYT  | PLDYALLGER     | HEVIQFMLEHGALSIAATQDIAAF                |                                             |                                 |              |        |            |           |                    |   |         |    |    |   |     |   |   |   |   |   |   |   |   |   |   |   |   |   |   |   |   |   |   |   |   |   |   |   |   |   |   |   |   |   |   |   |   |   |   |   |   |   |   |   |   |
| <b>DrInvs</b>   | ALHWS  | CNNGYLDAVKL | LLGCG-AFP   | NH        | MEHTEERYT  | PLDYALLGEH     | QELTQFLLEHGALSIAATQDIAAS                |                                             |                                 |              |        |            |           |                    |   |         |    |    |   |     |   |   |   |   |   |   |   |   |   |   |   |   |   |   |   |   |   |   |   |   |   |   |   |   |   |   |   |   |   |   |   |   |   |   |   |   |   |   |   |   |
| <b>HpInvsL</b>  | ALHWAC | STGYLDATRL  | LLDHG-AFP   | NH        | MELTEDRFT  | PLDYALLNDH     | HHEVSQYMVEQGALSITGIRDMAAT               |                                             |                                 |              |        |            |           |                    |   |         |    |    |   |     |   |   |   |   |   |   |   |   |   |   |   |   |   |   |   |   |   |   |   |   |   |   |   |   |   |   |   |   |   |   |   |   |   |   |   |   |   |   |   |   |
| <b>SkInvs</b>   | ALHWAC | SSGCLDAIKL  | LLFEYK-AFP  | NH        | MEFNE      | DRFTPLDYALLNDH | HHDVAQYMIEQGALSITGIRDLVAS               |                                             |                                 |              |        |            |           |                    |   |         |    |    |   |     |   |   |   |   |   |   |   |   |   |   |   |   |   |   |   |   |   |   |   |   |   |   |   |   |   |   |   |   |   |   |   |   |   |   |   |   |   |   |   |   |
| <b>AcInvs</b>   | CLHWAC | SKGHLDAVKL  | LVEYA-AY    | PN        | HMEFTEERYT | PLDYALMGEH     | HHEVAQYMIEQGALSITGIQDIAAL               |                                             |                                 |              |        |            |           |                    |   |         |    |    |   |     |   |   |   |   |   |   |   |   |   |   |   |   |   |   |   |   |   |   |   |   |   |   |   |   |   |   |   |   |   |   |   |   |   |   |   |   |   |   |   |   |
| <b>ChDgo</b>    | ALHLA  | CRS         | GNLDAVKL    | LVSR      | YRANMNI    | FDGSE          | EKLTCLDYAILNDHQDVSFFLTENGANTISTLHDLS-L  |                                             |                                 |              |        |            |           |                    |   |         |    |    |   |     |   |   |   |   |   |   |   |   |   |   |   |   |   |   |   |   |   |   |   |   |   |   |   |   |   |   |   |   |   |   |   |   |   |   |   |   |   |   |   |   |
| <b>OcInvs1</b>  | SIHWAS | SASGHLEA    | IRLLFEFG-AN | PN        | FMEVDGDR   | LTPLDYAI       | INDHQEAAQYMIEQGALSITGIQELAAT            |                                             |                                 |              |        |            |           |                    |   |         |    |    |   |     |   |   |   |   |   |   |   |   |   |   |   |   |   |   |   |   |   |   |   |   |   |   |   |   |   |   |   |   |   |   |   |   |   |   |   |   |   |   |   |   |
| <b>OlInvs1</b>  | SIHWAS | SASGHLEA    | IRLLFEYG-AN | PN        | FMEVDGDR   | LTPLDYAI       | INDHQEAAQCLIEQGALSITGIQDLAAT            |                                             |                                 |              |        |            |           |                    |   |         |    |    |   |     |   |   |   |   |   |   |   |   |   |   |   |   |   |   |   |   |   |   |   |   |   |   |   |   |   |   |   |   |   |   |   |   |   |   |   |   |   |   |   |   |
| <b>OspInvs1</b> | PIHWAS | GGGHLEA     | IRLLFEYG-AN | PN        | FMEVDGER   | LTPLDYAI       | IKDHEVAQFMIEQGALSITGIQDLAAT             |                                             |                                 |              |        |            |           |                    |   |         |    |    |   |     |   |   |   |   |   |   |   |   |   |   |   |   |   |   |   |   |   |   |   |   |   |   |   |   |   |   |   |   |   |   |   |   |   |   |   |   |   |   |   |   |
| <b>ScInvs1</b>  | ALHWS  | SASQGHIE    | VVQLLEFG-AF | CN        | PMEVDGDR   | LTPLDYAI       | IGDHEVAQFLMEQGALSITGIQDMAAT             |                                             |                                 |              |        |            |           |                    |   |         |    |    |   |     |   |   |   |   |   |   |   |   |   |   |   |   |   |   |   |   |   |   |   |   |   |   |   |   |   |   |   |   |   |   |   |   |   |   |   |   |   |   |   |   |
| <b>AqInvs1</b>  | PLHWAC | CAGSSDCV    | QFLLSKG-AN  | PN        | NAMDSS-EQ  | LTPLDYAI       | LENHQELAQUALINGALTIASTIQLAAI            |                                             |                                 |              |        |            |           |                    |   |         |    |    |   |     |   |   |   |   |   |   |   |   |   |   |   |   |   |   |   |   |   |   |   |   |   |   |   |   |   |   |   |   |   |   |   |   |   |   |   |   |   |   |   |   |
| <b>EmInvs1</b>  | GLHWAC | SAGHLDTV    | QLLGAG-AV   | PN        | LMEANGDK   | LTPLDYAI       | IGNHQEIAQLLIEQGALSASGIHDLAAV            |                                             |                                 |              |        |            |           |                    |   |         |    |    |   |     |   |   |   |   |   |   |   |   |   |   |   |   |   |   |   |   |   |   |   |   |   |   |   |   |   |   |   |   |   |   |   |   |   |   |   |   |   |   |   |   |
| <b>AvInvs1</b>  | ALHLA  | I           | HGSENSVDF   | LISNG-AK  | LNQ        | MDFS           | NERRTPFDLAIYFEKHNIISILQNSGCVSGQEIITLAVV |                                             |                                 |              |        |            |           |                    |   |         |    |    |   |     |   |   |   |   |   |   |   |   |   |   |   |   |   |   |   |   |   |   |   |   |   |   |   |   |   |   |   |   |   |   |   |   |   |   |   |   |   |   |   |   |
| <b>OmInvs1</b>  | PLHWAV | MHENIHTI    | KILVEND-AK  | IN        | VMDYS      | MQRRTPLDLS     | LFIEDREIYSFLRYLGCVTGIEIOTLAVI           |                                             |                                 |              |        |            |           |                    |   |         |    |    |   |     |   |   |   |   |   |   |   |   |   |   |   |   |   |   |   |   |   |   |   |   |   |   |   |   |   |   |   |   |   |   |   |   |   |   |   |   |   |   |   |   |
| <b>OcInvs2</b>  | SLHLA  | VKN         | GMDVAL      | VEALLR--G | T          | PNPSI          | WNADQETPLDL                             | CFNHNQLQLADSLVSAGAMKFIEIQSLAAT              |                                 |              |        |            |           |                    |   |         |    |    |   |     |   |   |   |   |   |   |   |   |   |   |   |   |   |   |   |   |   |   |   |   |   |   |   |   |   |   |   |   |   |   |   |   |   |   |   |   |   |   |   |   |
| <b>OlInvs2</b>  | SLHIA  | VKN         | SDASL       | V         | TALLS--G   | A              | NP                                      | SVWNEDGETPLDFCYKFGQLQLVDTLINAGAMKFTDIQSFAAT |                                 |              |        |            |           |                    |   |         |    |    |   |     |   |   |   |   |   |   |   |   |   |   |   |   |   |   |   |   |   |   |   |   |   |   |   |   |   |   |   |   |   |   |   |   |   |   |   |   |   |   |   |   |
| <b>OspInvs2</b> | SLHLA  | VKHGADK     | ALKFLR--S   | A         | NP         | N              | V                                       | LNENRETPLD                                  | FCYKLNQFHLVNTLVGACAVTFSHIESLAAT |              |        |            |           |                    |   |         |    |    |   |     |   |   |   |   |   |   |   |   |   |   |   |   |   |   |   |   |   |   |   |   |   |   |   |   |   |   |   |   |   |   |   |   |   |   |   |   |   |   |   |   |
| <b>ScInvs2</b>  | PLHLA  | SGSGH       | DEVVEAL     | L         | ORG-AA     | V              | N                                       | RSFAEEDITAL                                 | DAKQNGHDGCAAILQQCGGMTMEEIQSKAAT |              |        |            |           |                    |   |         |    |    |   |     |   |   |   |   |   |   |   |   |   |   |   |   |   |   |   |   |   |   |   |   |   |   |   |   |   |   |   |   |   |   |   |   |   |   |   |   |   |   |   |   |
| <b>AqInvs2</b>  | MLHIA  | A           | AKECKHEI    | L         | Q          | LLVNN-GY       | I                                       | NS                                          | MATEDRYTPLDYAIQGNHFECMTL        | LKSGGMTVDEIR | RTIAAV |            |           |                    |   |         |    |    |   |     |   |   |   |   |   |   |   |   |   |   |   |   |   |   |   |   |   |   |   |   |   |   |   |   |   |   |   |   |   |   |   |   |   |   |   |   |   |   |   |   |
| <b>EmInvs2</b>  | ALHLS  | SIE         | CGE         | CV        | R          | QLLSYN-AH      | PN                                      | I                                           | M                               | DTT          | Q      | RCTPLDYARL | HDHTPCADL | LVEAGGLVSASIKEMAAI |   |         |    |    |   |     |   |   |   |   |   |   |   |   |   |   |   |   |   |   |   |   |   |   |   |   |   |   |   |   |   |   |   |   |   |   |   |   |   |   |   |   |   |   |   |   |
| <b>AvInvs2</b>  | PIHHA  | I           | LKEKIEI     | V         | A          | ILCQFG-AY      | L                                       | D                                           | L                               | Q            | L      | R          | D         | F                  | S | DTCLDLA | I  | NN | Q | QGI | I | N | V | L | K | E | Y | D | A | K | T | K | F | E | L | E | T | G | A | A |   |   |   |   |   |   |   |   |   |   |   |   |   |   |   |   |   |   |   |   |
| <b>OmInvs2</b>  | PIHHA  | V           | L           | K         | G          | N              | A                                       | P                                           | V                               | V            | K      | V          | L         | C                  | A | Y       | -A | Y  | L | Y   | L | Q | L | I | E | F | D | F | D | T | C | L | D | L | A | V | N | K | Q | V | E | I | V | D | V | L | K | R | N | A | L | T | F | E | I | R | T | K | A | A |
| <b>SrInvs</b>   | PLHWAC | SQ          | G           | F         | D          | V              | V                                       | R                                           | E                               | L            | L      | N          | Y         | -A                 | Y | P       | N  | F  | T | D   | R | S | E | D | Q | L | T | P | L | D | Y | A | L | S | G | G | F | Q | E | C | V | D | L | L | V | E | A | R | G | A | T | G | D | E | L | R | A | F | A |   |

```

          710          720          730          740          750          760          770
    ....|....|....|....|....|....|....|....|....|....|....|....|....|
MmInvs  KIQA VYKGYKVRKAFRDRKNLLMKHEQLRKDAAAKKREEENKRKEAE-----
DrInvs  SIQA LYKGYKVRRAFRRERKLLMRHEQLRKDAAAKK--EEERRREAE-----
HpInvsL RIQCRFRGFCVVRKTFVERKLLMKHEQLRKDAAAKKREEQSKKGDN-----
SkInvs  KIQAHYRGYLVVRKTFLEKLLMKHEQLRKDAAAKKKEQETKKRQLE-----
AcInvs  KIQSAFKGFRVRKAFIERKLLFMKHEKLLKKEAARKRAAEEGKKSEDQTVRKQDTMKSSTASIPGTEHQTP
ChDgo   KIQTNRGYSARKRYAELKRKMNI STSIPKRRLTNLT'TTSLGDNTLKV-----
OcInvs1 AIQSAWRGHVIRRKSQARKEKADVRSSAASSRKVISEEE---RREE-----
OlInvs1 AIQSAWRGHVVR-KAIAKKKREAPSASSGGRPVSVGS-----RGDD-----
OspInvs1 AIQSAWRGHLTR-KALAKKRSIESASSAKT-VRSGRDGA---AADK-----
ScInvs1 AIQSAFRGRTARKRFRSMKSQTEIMRREEEERLQOESANLLLTETA-----
AqInvs1 MIQKVVRGYLARKRFKLLHAEKVKGEVVEETGGTETEA-----
EmInvs1 IIQKWVRGYLSRKKAAILRAQKLQQRSMPOGLPSSRTSS-----
AvInvs1 EIQKFWRKMN RVCKRRMHANLSSTQN-----
OmInvs1 EIQRFWRHISRQ-RLKKNLRITSPEK-----
OcInvs2 AIQAAFRGWRTKKSLKSKQRKNAAVIIQSYFRGFLGRKKFKQMVGR-----
OlInvs2 AIQAAAYRGWKARRELKGEAKLARAALKIQSYRGRYRGRKRYREVVR-----
OspInvs2 AIQAAAYRGWRVRELKVEERLANAALKIQSCFRGFQERKRYRNLLCR-----
ScInvs2 IIQAVSRGYLARRSMLWLVERRLAVVAIQKTVRGFQRRRFQSM LQR-----
AqInvs2 WIQSSYRKYKAMKLLKLRKERLAAVCLQRICRGFIERRRVKKLQKE-----
EmInvs2 TIQANFRGHMARKLRKKLVTSRAVTVISAAFRGYCQRKHYKQKKRE-----
AvInvs2 VIQTCVRFFFLARIQFLQLKRKAKAVSTISAYFKGFKARNFYFDLKRK-----
OmInvs2 IIQSYLRCHLAKLQFANLKISSRAATVISANFRSFQTRLYRNLKRQ-----
SrInvs  TIQAAFRVFOAKRILQNLKRKQSNAAI VIQAAARGFLERNRYKSMR-----

```

```

          780          790          800          810          820          830          840
    ....|....|....|....|....|....|....|....|....|....|....|....|
MmInvs  -----QQKGQLDTPPRSHCSSAPVLP CPPSPQNEGSKQDATPSKQPPASHT
DrInvs  -----QQLSFAEAGQKQRVLLAAVGVKLSLDEAEQRVKDSVAAKGHKHKSS
HpInvsL -----PDSSTPLNSQSQDRISTSN EEMLP PPKDR TQLLENGWTQENANTNNN
SkInvs  -----YRKREEQRRQLH HKQGNESQNSTDSEQDK---INNQH RQHPVKETS V
AcInvs  QQQA EQLP TPPLVIQDSQESLP PDSRAESSQTIKEEVPTERETGLSQQQHQQKRQQQQKQHEHKQVQ
ChDgo   -----TLPPVSPTHAVLPHKANSHIGIPTARYRSNTQVSHTSNVSDSRQGP KF
OcInvs1 -----ERRQREESARKKAS--ERRAALEKELADAER-IDDKEKQTELKR----
OlInvs1 -----EK RKREESARKKAF--ERRAALERE LADAER-LDDKERQTELKR----
OspInvs1 -----AKESRDESARKKAF--ERRAALERE LADAQR-FDDKERQVELKR----
ScInvs1 -----QKRQRQELEQLIAHGKDRIARLEREVDGGQSSLPPI DIAAGNRM----
AqInvs1 -----TDAVSSRPDSS---HRRSLELQVAES-----
EmInvs1 -----RTSESTHTPTQ---PQAILKLEAPKSEAVVVKVGHRRLEA----
AvInvs1 -----FVSKKNIEDPIS-----QDNILVIKSRDVIYIP-LTLP T-----
OmInvs1 -----PVQKSRVQPSLRSIDSSLTNDVHKTNCDEKYFPNLEIHP-----
OcInvs2 -----HKAAQVIQRNYRAFVMEKRRRKELIQQRKKT EMMVLVNDFHQRLLV
OlInvs2 -----DKAARVVRQNYRNFVLRKERKRELLRLRRKTEVTVLISEFHERLLI
OspInvs2 -----RNAAVTIQSYWRGHLERC SYRTKLT EYNQQAYHQRLIHTLHDQLT-
ScInvs2 -----LKSSIIIQALVRGFLARRSYQKLLQKRIEEQKKHQLIEEFGQMF IG
AqInvs2 -----LEAAIKIQAFYRGHLQR IKFRSKLAEFKEQRCNDE RVLNFAKWLLG
EmInvs2 -----QTNAVIIQSFYRGFLQRKIFKIDLQKFRAYNLHNFYIDMMHQNYLN
AvInvs2 -----HLYATKIQAFFRGFQQRKRFVQDLANFRAVRTHNNYIDCINRLY LK
OmInvs2 -----EDPSQRHQOQEPANKDDEERKRKEEEERRRRQOEEERRERERERKAKAE
SrInvs

```

|                 | 850                                                                   | 860                              | 870                  | 880          | 890      | 900   | 910 |
|-----------------|-----------------------------------------------------------------------|----------------------------------|----------------------|--------------|----------|-------|-----|
|                 | .... .... .... .... .... .... .... .... .... .... .... .... .... .... |                                  |                      |              |          |       |     |
| <b>MmInvs</b>   | VQSPDPEHSRLPGRC                                                       | PGRASQGDSSIDLQGTASRKPSETPIEHCRGP | -----                |              |          |       |     |
| <b>DrInvs</b>   | SAHNSQSRREKPSRAE                                                      | RRRTREPETSDAPSI                  | RSLPPVTFPMSTKKCPVT   | -----        |          |       |     |
| <b>HpInvsL</b>  | -----NNSAVDASVN--LSEGFAP                                              |                                  | -----                |              |          |       |     |
| <b>SkInvs</b>   | -----TSSDTEESVSSSRSDKYSV                                              |                                  | -----                |              |          |       |     |
| <b>AcInvs</b>   | PQLQREERGEDPVA                                                        | VNGKTLTSASSDSDSGAVT              | GSSSTVSSQGRRKHTQL    | QOQQQPASQKDI | VVEKKKSP | ----- |     |
| <b>ChDgo</b>    | IEGN-----                                                             | AANPFSLNRVARV                    | KSPGTEMRVPNSSRSKSSTG | -----        |          |       |     |
| <b>OcInvs1</b>  | -----RQRQLDHEERLREESARQ                                               |                                  | PDSPKN               | -----        |          |       |     |
| <b>OlInvs1</b>  | -----RQRQLEQEERLR---                                                  |                                  | ERQQGSPRRY           | -----        |          |       |     |
| <b>OspInvs1</b> | -----RQRQLEQEERLR---                                                  |                                  | LSE--SPKR            | -----        |          |       |     |
| <b>ScInvs1</b>  | -----VKASKDKGKGVRL                                                    |                                  | PPI                  | ISQHGQLTS    | -----    |       |     |
| <b>AqInvs1</b>  | -----ERQAKEWALR                                                       |                                  | -----                |              |          |       |     |
| <b>EmInvs1</b>  | -----RLKETDQKLQSL                                                     |                                  | -----                |              |          |       |     |
| <b>AvInvs1</b>  | -----                                                                 |                                  |                      |              |          |       |     |
| <b>OmInvs1</b>  | -----                                                                 |                                  |                      |              |          |       |     |
| <b>OcInvs2</b>  | DK-----                                                               | AKAKVKSEKNGMEE                   | KENVIPDQMKLN         | -----        |          |       |     |
| <b>OlInvs2</b>  | DR-----                                                               | ARVKAKPIVD---                    | RKGGEDSDKEKAVSN      | -----        |          |       |     |
| <b>OspInvs2</b> | DK-----                                                               | RLVKAKPTVE---                    | ERRRDK--EEKARFN      | -----        |          |       |     |
| <b>ScInvs2</b>  | -----QKWRQEGLTR                                                       |                                  | TPPKAQP              | PPVQT        | -----    |       |     |
| <b>AqInvs2</b>  | -----LQRIEPIVIDADEL                                                   |                                  | HMKAKDKDHEGAKK       | -----        |          |       |     |
| <b>EmInvs2</b>  | VGAG-DLTALAESER                                                       | APPPQPSFMSGHEL                   | RGAGIQSESACTA        | QDVRV        | -----    |       |     |
| <b>AvInvs2</b>  | EIANSKFKKLTIED                                                        | LDLFENSLFISPWR                   | SSLREKRQETLDD        | RSRLEN       | -----    |       |     |
| <b>OmInvs2</b>  | GIRENTIKTFTIK                                                         | DLDFTDALYISPWR                   | SSLREKRQETVED        | RIRLEN       | -----    |       |     |
| <b>SrInvs</b>   | QE-----                                                               | EKLKRRKKQKQE                     | QERRRREEARKKKEAE     | -----        |          |       |     |

|                 | 920                                                              | 930              | 940           | 950       | 960     | 970  | 980        |
|-----------------|------------------------------------------------------------------|------------------|---------------|-----------|---------|------|------------|
|                 | .... .... .... .... .... .... .... .... .... .... .... .... .... |                  |               |           |         |      |            |
| <b>MmInvs</b>   | -----                                                            |                  |               |           |         |      |            |
| <b>DrInvs</b>   | -----                                                            |                  |               |           |         |      |            |
| <b>HpInvsL</b>  | -----                                                            |                  |               |           |         |      |            |
| <b>SkInvs</b>   | -----                                                            |                  |               |           |         |      |            |
| <b>AcInvs</b>   | DPLTVEVQKKS                                                      | LMPAPAPVTTLPKQDE | PTRRQQQTVGTPD | VKPKQRSRS | GGRLQER | GHSA | PPRRSSKPIA |
| <b>ChDgo</b>    | -----                                                            |                  |               |           |         |      |            |
| <b>OcInvs1</b>  | -----                                                            |                  |               |           |         |      |            |
| <b>OlInvs1</b>  | -----                                                            |                  |               |           |         |      |            |
| <b>OspInvs1</b> | -----                                                            |                  |               |           |         |      |            |
| <b>ScInvs1</b>  | -----                                                            |                  |               |           |         |      |            |
| <b>AqInvs1</b>  | -----                                                            |                  |               |           |         |      |            |
| <b>EmInvs1</b>  | -----                                                            |                  |               |           |         |      |            |
| <b>AvInvs1</b>  | -----                                                            |                  |               |           |         |      |            |
| <b>OmInvs1</b>  | -----                                                            |                  |               |           |         |      |            |
| <b>OcInvs2</b>  | -----                                                            |                  |               |           |         |      |            |
| <b>OlInvs2</b>  | -----                                                            |                  |               |           |         |      |            |
| <b>OspInvs2</b> | -----                                                            |                  |               |           |         |      |            |
| <b>ScInvs2</b>  | -----                                                            |                  |               |           |         |      |            |
| <b>AqInvs2</b>  | -----                                                            |                  |               |           |         |      |            |
| <b>EmInvs2</b>  | -----                                                            |                  |               |           |         |      |            |
| <b>AvInvs2</b>  | -----                                                            |                  |               |           |         |      |            |
| <b>OmInvs2</b>  | -----                                                            |                  |               |           |         |      |            |
| <b>SrInvs</b>   | -----                                                            |                  |               |           |         |      |            |

|                 |                                                                       |      |      |      |      |      |      |
|-----------------|-----------------------------------------------------------------------|------|------|------|------|------|------|
|                 | 990                                                                   | 1000 | 1010 | 1020 | 1030 | 1040 | 1050 |
|                 | ....                                                                  | .... | .... | .... | .... | .... | .... |
| <b>MmInvs</b>   | -----                                                                 |      |      |      |      |      |      |
| <b>DrInvs</b>   | -----                                                                 |      |      |      |      |      |      |
| <b>HpInvsL</b>  | -----                                                                 |      |      |      |      |      |      |
| <b>SkInvs</b>   | -----                                                                 |      |      |      |      |      |      |
| <b>AcInvs</b>   | LSYAQLLQOKDAMQRQOKPLQTKQLQSKQQPQRKSKQQQVTQQQLSKQQTHLPKQQTPRLKQQLRQPKQ |      |      |      |      |      |      |
| <b>ChDgo</b>    | -----                                                                 |      |      |      |      |      |      |
| <b>OcInvs1</b>  | -----                                                                 |      |      |      |      |      |      |
| <b>OlInvs1</b>  | -----                                                                 |      |      |      |      |      |      |
| <b>OspInvs1</b> | -----                                                                 |      |      |      |      |      |      |
| <b>ScInvs1</b>  | -----                                                                 |      |      |      |      |      |      |
| <b>AqInvs1</b>  | -----                                                                 |      |      |      |      |      |      |
| <b>EmInvs1</b>  | -----                                                                 |      |      |      |      |      |      |
| <b>AvInvs1</b>  | -----                                                                 |      |      |      |      |      |      |
| <b>OmInvs1</b>  | -----                                                                 |      |      |      |      |      |      |
| <b>OcInvs2</b>  | -----                                                                 |      |      |      |      |      |      |
| <b>OlInvs2</b>  | -----                                                                 |      |      |      |      |      |      |
| <b>OspInvs2</b> | -----                                                                 |      |      |      |      |      |      |
| <b>ScInvs2</b>  | -----                                                                 |      |      |      |      |      |      |
| <b>AqInvs2</b>  | -----                                                                 |      |      |      |      |      |      |
| <b>EmInvs2</b>  | -----                                                                 |      |      |      |      |      |      |
| <b>AvInvs2</b>  | -----                                                                 |      |      |      |      |      |      |
| <b>OmInvs2</b>  | -----                                                                 |      |      |      |      |      |      |
| <b>SrInvs</b>   | -----                                                                 |      |      |      |      |      |      |

|                 |                                                                        |      |      |      |      |      |      |
|-----------------|------------------------------------------------------------------------|------|------|------|------|------|------|
|                 | 1060                                                                   | 1070 | 1080 | 1090 | 1100 | 1110 | 1120 |
|                 | ....                                                                   | .... | .... | .... | .... | .... | .... |
| <b>MmInvs</b>   | -----SACVHPRSWEGGNSKNGTSSVEKRRGETNGKHRRCEE GPSSARQP                    |      |      |      |      |      |      |
| <b>DrInvs</b>   | -----REEVCVRETFGPD TGISLNCGSANERRS-----PAGSSRP                         |      |      |      |      |      |      |
| <b>HpInvsL</b>  | -----SSEMLSRDEDG-----EKMGVAM-----KIGPPLL GSSNP                         |      |      |      |      |      |      |
| <b>SkInvs</b>   | -----SSDRYSDNFED-----EEM-----                                          |      |      |      |      |      |      |
| <b>AcInvs</b>   | QLQQQQQT PPLRQQAQPPHLPPGSAEPRSRSRKGRKSSNTSALSVSVELSSA-----SVDGTGASATPP |      |      |      |      |      |      |
| <b>ChDgo</b>    | -----                                                                  |      |      |      |      |      |      |
| <b>OcInvs1</b>  | -----Q-----                                                            |      |      |      |      |      |      |
| <b>OlInvs1</b>  | -----Q-----                                                            |      |      |      |      |      |      |
| <b>OspInvs1</b> | -----Q-----                                                            |      |      |      |      |      |      |
| <b>ScInvs1</b>  | -----S-----                                                            |      |      |      |      |      |      |
| <b>AqInvs1</b>  | -----                                                                  |      |      |      |      |      |      |
| <b>EmInvs1</b>  | -----                                                                  |      |      |      |      |      |      |
| <b>AvInvs1</b>  | -----                                                                  |      |      |      |      |      |      |
| <b>OmInvs1</b>  | -----                                                                  |      |      |      |      |      |      |
| <b>OcInvs2</b>  | -----                                                                  |      |      |      |      |      |      |
| <b>OlInvs2</b>  | -----                                                                  |      |      |      |      |      |      |
| <b>OspInvs2</b> | -----                                                                  |      |      |      |      |      |      |
| <b>ScInvs2</b>  | -----                                                                  |      |      |      |      |      |      |
| <b>AqInvs2</b>  | -----                                                                  |      |      |      |      |      |      |
| <b>EmInvs2</b>  | -----                                                                  |      |      |      |      |      |      |
| <b>AvInvs2</b>  | -----                                                                  |      |      |      |      |      |      |
| <b>OmInvs2</b>  | -----                                                                  |      |      |      |      |      |      |
| <b>SrInvs</b>   | -----                                                                  |      |      |      |      |      |      |

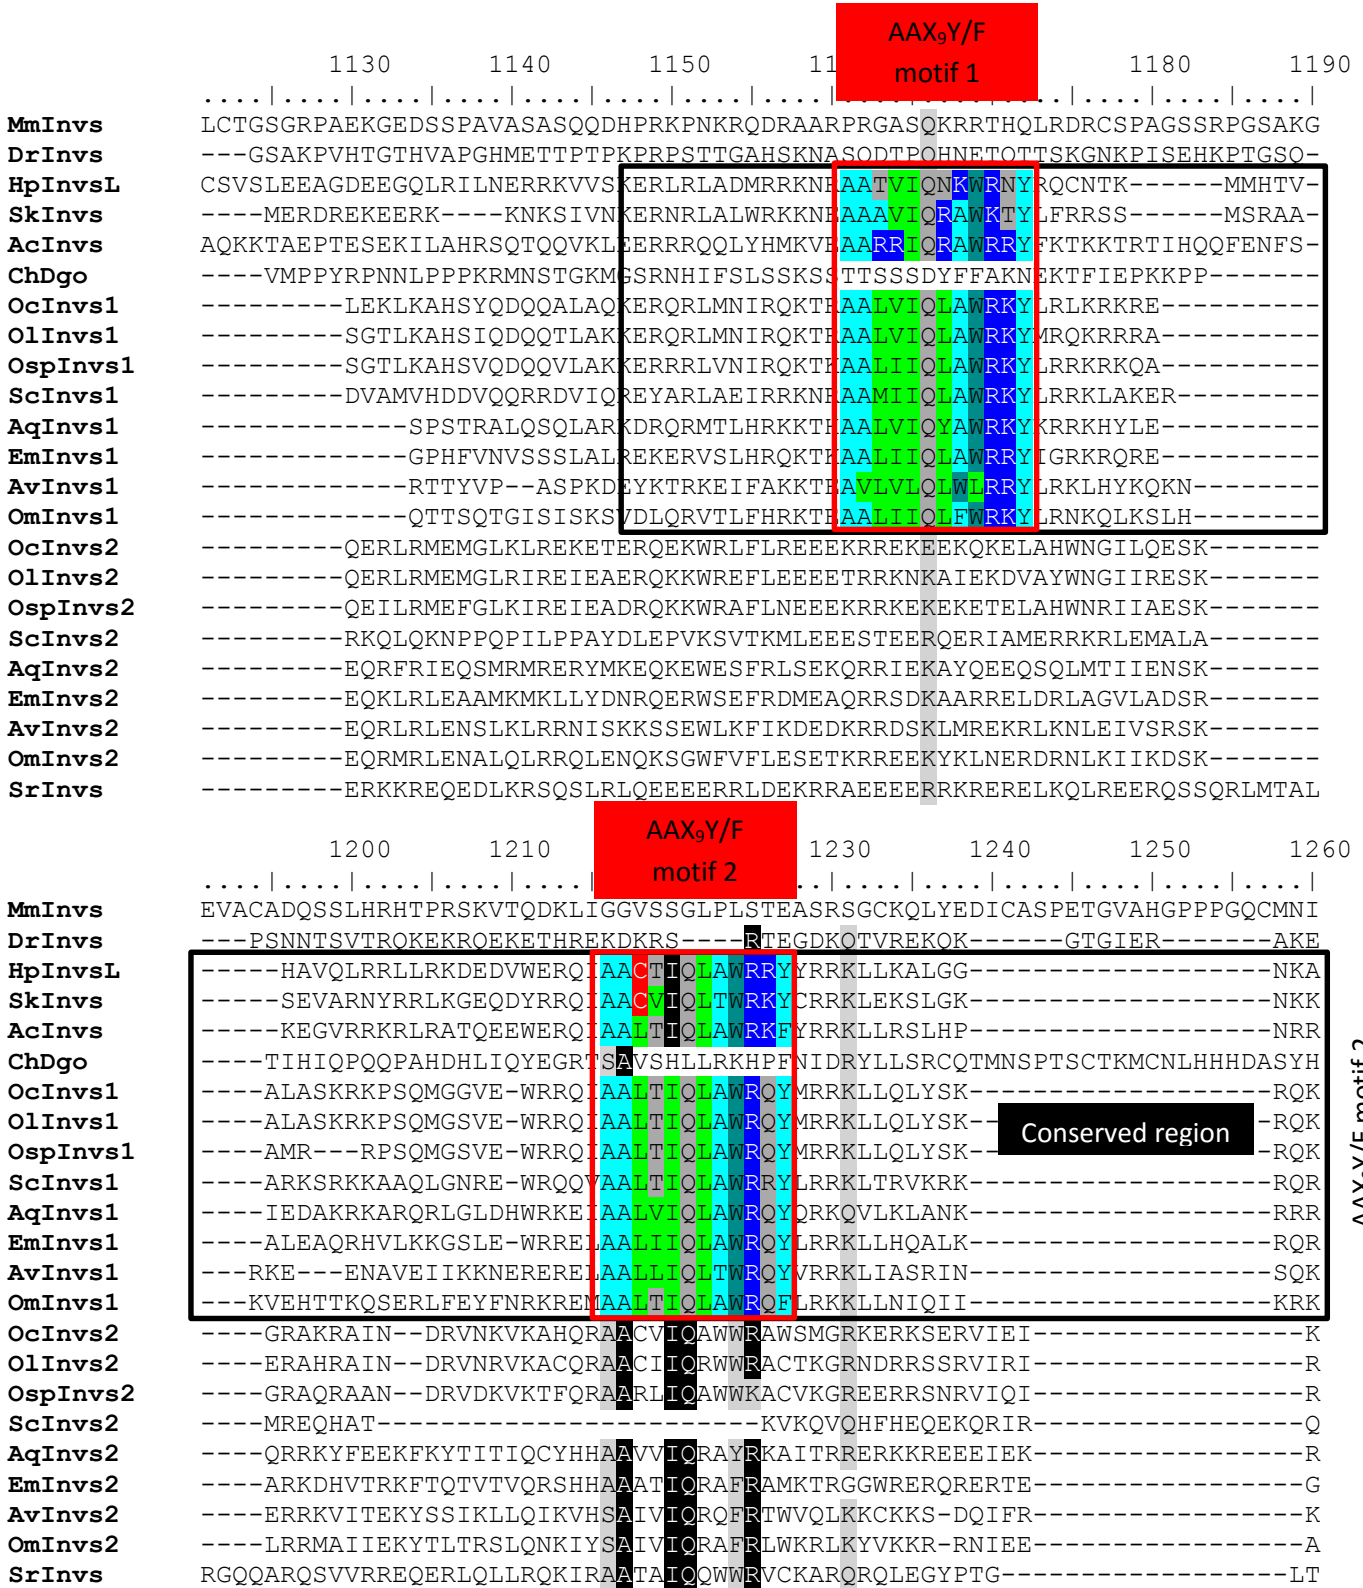



|                 |                                                                            |                                                             |           |                   |                 |               |              |          |                                                             |           |         |         |            |           |
|-----------------|----------------------------------------------------------------------------|-------------------------------------------------------------|-----------|-------------------|-----------------|---------------|--------------|----------|-------------------------------------------------------------|-----------|---------|---------|------------|-----------|
|                 | 12                                                                         | AAx <sub>9</sub> Y/F motif 3                                |           |                   |                 | 1290          | 1300         | 1310     | AAx <sub>9</sub> Y/F motif 4                                |           |         |         | 1330       |           |
|                 | .... ....                                                                  | .... .... .... .... .... .... .... .... .... .... .... .... |           |                   |                 |               |              |          | .... .... .... .... .... .... .... .... .... .... .... .... |           |         |         |            |           |
| <b>MmInvs</b>   | HLLPVEQRLLI                                                                | IQRERSRKELF                                                 | ----      | RRKNKAAAVIQRAVRSY | QLRKHL          | SRLHLHLKQLGAR | ----         | EV       |                                                             |           |         |         |            |           |
| <b>DrInvs</b>   | RLMGRTRK                                                                   | KLAKEKEK                                                    | KKDGT     | ----              | CSKNQAAVVIQRAWR | SCVGRGRIRK    | VLCRSIKGVESA | EATALL   |                                                             |           |         |         |            |           |
| <b>HpInvsL</b>  | LVHTYDPEI                                                                  | IALRQY                                                      | TLQKVY    | ----              | GSTTEAKEWF      | PGPLERKNR     | PDYMKYIP     | SAAMSYNF | FAVEQY                                                      | IP        |         |         |            |           |
| <b>SkInvs</b>   | ILYPWSP                                                                    | VLAAKQRHL                                                   | VEQIY     | ----              | SEVLIAREWYP     | -ELPRVIR      | PDYMKFVPS    | AAALS    | SYNF                                                        | FAVDQY    | IP      |         |            |           |
| <b>AcInvs</b>   | QLLMWDPEV                                                                  | YALKQQAL                                                    | VNYIY     | ----              | NEQIHAPFWHP     | -TLKAAAR      | PLWFRFIPS    | AAAVS    | SYNF                                                        | FAVDQY    | IP      |         |            |           |
| <b>ChDgo</b>    | NLLHDRAQ                                                                   | APVIQTSK                                                    | MVATNH    | GIFIEET           | KNEYTS          | FDKQRL        | PSKYNP       | FFVVT    | VQGV                                                        | LSVSIEMIK | QYLI    | V       |            |           |
| <b>OcInvs1</b>  | ILHEWSP                                                                    | SVLAARQR                                                    | ALLETIY   | ----              | SQEVRI          | VQYRPP        | SPKPMVR      | PAYFRY   | IPSCAAVS                                                    | FNFAV     | DQYIP   |         |            |           |
| <b>OlInvs1</b>  | ILHEWSP                                                                    | SVLAAKQR                                                    | ALVEKIY   | ----              | SQEVRI          | VQYRPP        | SPKPMVR      | PAYFRY   | IPSCAAL                                                     | FFNF      | FAVDQY  | IP      |            |           |
| <b>OspInvs1</b> | ILHEWSP                                                                    | SVLAAKQR                                                    | VLIENIY   | ----              | SQEVRI          | VQYRPP        | SPKPMVR      | PAYFRY   | IPSCAALS                                                    | FNFAV     | DQYIP   |         |            |           |
| <b>ScInvs1</b>  | ILYEWTP                                                                    | SVLAAKQR                                                    | LLIEQIY   | ----              | SHEPVI          | TQYKPP        | RPKPMAR      | PPHLLNT  | ASZAATS                                                     | SYNF      | FALDHY  | IP      |            |           |
| <b>AqInvs1</b>  | ILHQWTP                                                                    | SVLAAKQR                                                    | LLVEKVIY  | ----              | GQELK           | TSQYHP        | PKPRMVR      | PAYLQ    | LVASHAATS                                                   | FNFAV     | NOYIP   |         |            |           |
| <b>EmInvs1</b>  | ILHEWTP                                                                    | SVLAAKQR                                                    | ALVAKVIY  | ----              | GQGFS           | TVHYEP        | PKPKMVR      | PAYLHF   | IPSCAALS                                                    | FNFAV     | NOYIP   |         |            |           |
| <b>AvInvs1</b>  | KVFLWSP                                                                    | AVMATR                                                      | QRFIL     | EKLY              | ----            | SQSFY         | PNYYP        | PGKLV    | PLERPC                                                      | YTKFI     | ASFAALS | FNFAV   | NOYIP      |           |
| <b>OmInvs1</b>  | KLFQWSP                                                                    | GCIAIRQR                                                    | LLIEQIY   | ----              | SQGFH           | PFYYP         | TSSISR       | ADRPS    | FIKYIP                                                      | SCAALS    | FNFAV   | NOYIP   |            |           |
| <b>OcInvs2</b>  | SMMIQR                                                                     | KRAAKVI                                                     | QRAWQEKIR | ----              | RDRVW           | VKSRKQ        | IRMLTE       | ENAPY    | IRPTLM                                                      | QGKPK     | HKHKL   | GPLRIPS |            |           |
| <b>OlInvs2</b>  | GLMIGR                                                                     | RRAAKVI                                                     | QRAWRD    | KKK               | ----            | RDAGRE        | KSRKQ        | ARAFNE   | ETAPY                                                       | IRPTLV    | QGKPR   | HKHKL   | GPLRIGS    |           |
| <b>OspInvs2</b> | ESMIRR                                                                     | KRAARVI                                                     | QRAWR     | KKKR              | ----            | REGARE        | KSRRQ        | IRAFNE   | ETAPY                                                       | IRPILA    | QGKPR   | RRL     | GPLKI      |           |
| <b>ScInvs2</b>  | KELAKV                                                                     | CCK                                                         |           |                   | ----            |               |              |          |                                                             |           |         |         |            |           |
| <b>AqInvs2</b>  | KQRLLDM                                                                    | QAARI                                                       | IQR       | SWRRYKD           | ----            | WKRFE         | AHHLDS       | IITSP    | VVIMP                                                       | KHHL      | PSVP    | --IAQ   | LYERSTIVS  |           |
| <b>EmInvs2</b>  | LKVKREG                                                                    | HAAQVI                                                      | QRAWR     | GYRA              | ----            | YREYR         | ALNYK        | SVATC    | PVIDT                                                       | STRPQ     | ACHGS   | AWVHS   | YERATSVT   |           |
| <b>AvInvs2</b>  | IHTKTRE                                                                    | NAACLI                                                      | QKH       | WRRYLY            | ----            | RLMER         | RELKGT       | TEILD    | TNIAY                                                       | PLAIL     | STQPI   | IPT     | PPDVKTKSY  |           |
| <b>OmInvs2</b>  | RHLKSQ                                                                     | EKSARVI                                                     | QKH       | WRFHQY            | ----            | CLLQRE        | IKETA        | EVLDT    | NIDFP                                                       | FAVFG     | THPHQ   | PVSST   | FTKSKSY    |           |
| <b>SrInvs</b>   | PVESPN                                                                     | ATRRKKK                                                     | PR        | SRTTSP            | QGGKGR          | SPRRQ         | QR           | RANG     | RSLLT                                                       | H         | TREED   | RKRL    | VAAALTIQLW | WRRYLARK  |
|                 | 1340                                                                       | 1350                                                        | 1360      | 1370              | 1380            | 1390          | 1400         |          |                                                             |           |         |         |            |           |
|                 | .... .... .... .... .... .... .... .... .... .... .... .... .... .... .... |                                                             |           |                   |                 |               |              |          |                                                             |           |         |         |            |           |
| <b>MmInvs</b>   | LRCTQVCT                                                                   | ----                                                        | ALLLQV    | WRKELE            | LKFPK           | SISVS         | RTSK         | SPSKG    | SSATKY                                                      | ARHSV     | LRQI    | YGCS    | QEGKG      |           |
| <b>DrInvs</b>   | IQLLW                                                                      | EW                                                          | ----      | VLHDH             | THRK            | PSDVQ         | APPTR        | IAGK     | SSVL                                                        | QNIY      | GAAP    | SKRG    | TLR        | AAALKTQS  |
| <b>HpInvsL</b>  | DHHT                                                                       | ----                                                        | ISSGL     | DHIT              | ----            | LQRAV         | GN           | DQHDRS   | ----                                                        | MALDE     | ADE     | FLCQ    | SHGN       | LQGSGA    |
| <b>SkInvs</b>   | MLARR                                                                      | ----                                                        | GVGKA     | ENVPP             | WSPRL           | RPP           | SMR          | RDY      | GWTP                                                        | --QS      | GELF    | DEDF    | FRHMS      | LANSREASA |
| <b>AcInvs</b>   | WVSRLGA                                                                    | QPPFPE                                                      | PEATS     | GGVGR             | PHGHSS          | SSSR          | ASSR         | TESV     | RSSR                                                        | ARS       | DGSQ    | DEEK    | RAPS       | PAVNSK    |
| <b>ChDgo</b>    | NRSELS                                                                     | DFSTL                                                       | GSESD     | SYLS              | M               | DSEI          | PDDDT        | LREI     | ACFS                                                        | NTSS      | ME      | TVCQ    | IETFE      | QSKFR     |
| <b>OcInvs1</b>  | MTARL                                                                      | GM                                                          | TKT       | ----              | SDIKT           | GSTR          | VR           | PFSL     | RRGT                                                        | AGW       | SKGH    | LDG     | KGHS       | AFGASRS   |
| <b>OlInvs1</b>  | MTARL                                                                      | GM                                                          | TRT       | ----              | FDMKT           | GSTR          | VR           | PFSL     | RRGT                                                        | GGW       | KKEE    | PFR     | KGQ        | SAAFGG    |
| <b>OspInvs1</b> | MTARL                                                                      | GM                                                          | SRT       | ----              | LDVK            | SGSS          | RV           | PFSL     | RRGS                                                        | R         | GWR     | KEE     | SR         | KEQSLG    |
| <b>ScInvs1</b>  | VGRQL                                                                      | GV                                                          | TP        | ----              | RP              | GTR           | QL           | GAT      | S                                                           | RS        | SY      | QAF     | AY         | PWQI      |
| <b>AqInvs1</b>  | SFSP                                                                       | QSR                                                         | VF        | ----              |                 |               |              |          |                                                             |           |         |         |            |           |
| <b>EmInvs1</b>  | ----                                                                       | GGLV                                                        |           |                   |                 |               |              |          |                                                             |           |         |         |            |           |
| <b>AvInvs1</b>  | M                                                                          |                                                             |           |                   |                 |               |              |          |                                                             |           |         |         |            |           |
| <b>OmInvs1</b>  | VT                                                                         | D                                                           | CHF       |                   |                 |               |              |          |                                                             |           |         |         |            |           |
| <b>OcInvs2</b>  | AVRGI                                                                      | AS                                                          | SVPL      | ERT               | TKTS            | YEIE          | KRRG         | QKVY     | RDV                                                         | FR        | PW      | TVL     | PL         | SKSLAQ    |
| <b>OlInvs2</b>  | GVQDR                                                                      | SKTS                                                        | SYQ       | AKK               | ITS             | P             | TNT          | I        | NK                                                          | R         | G       | A       | T          | VEFRP     |
| <b>OspInvs2</b> | ----                                                                       |                                                             |           |                   |                 |               |              |          |                                                             |           |         |         |            |           |
| <b>ScInvs2</b>  | ----                                                                       |                                                             |           |                   |                 |               |              |          |                                                             |           |         |         |            |           |
| <b>AqInvs2</b>  | SSRRR                                                                      | KL                                                          | H         | K                 | T               | SQ            | S            | G        | F                                                           | K         | I       | F       | K          | A         |
| <b>EmInvs2</b>  | GTPK                                                                       | R                                                           | PL        | H                 | I               | T             | Q            | E        | G                                                           | R         | F       | L       | V          | F         |
| <b>AvInvs2</b>  | LSDT                                                                       | LL                                                          | T         | S                 | Q               | P             | R            | K        | L                                                           | L         | M       | P       | S          | R         |
| <b>OmInvs2</b>  | QADT                                                                       | LL                                                          | T         | L                 | K               | P             | K            | R        | K                                                           | I         | L       | M       | P          | P         |
| <b>SrInvs</b>   | YAKRR                                                                      | Q                                                           | R         | T                 | R               | V             | Q            | L        | H                                                           | G         | P       | A       | V          | S         |

```

          1410      1420      1430      1440      1450      1460      1470
.....|.....|.....|.....|.....|.....|.....|.....|.....|.....|.....|.....|.....|
MmInvs  HHPIKSSKAPAVLHLSSVNSLQSIHLDNSGRSKKFSYNLQPSSQSKNKPKL-----
DrInvs  SQVLLDLSLRTHKQLSAVECVN--LVDSVSOAKQFSYHLRPSGASQSSQN-----
HpInvsL P-YSYNLND-----
SkInvs  DHFSYNLHR-----
AcInvs  LSSSNTKKKS-----
ChDgo   LFICLKTKTFSKSRKFYYFIEWKGSLEGRYENEKNNRISIRLDFARCYWCGSEFTEEEAEKSQTGSFIFL
OcInvs1 VAGSILF-----
OlInvs1 LASSVLF-----
OspInvs1 IASSVIF-----
ScInvs1 QFQVLDEN-----
AqInvs1 -----
EmInvs1 -----
AvInvs1 -----
OmInvs1 -----
OcInvs2 K-----
OlInvs2 K-----
OspInvs2 -----
ScInvs2 -----
AqInvs2 ETNEESLKLPNIMLRQHTGHRSNPLAMTPIKLPLLK-----
EmInvs2 TTRGSRSSERRIAVEQDPSQRGFSQRGHSQQGLSQRGPLQRGFSQQSHSQQGSPQQSRSQRGLPQLLKAL
AvInvs2 PLDSKIDPFRNFKSQIAHVRSEFELPDNLPHRNPETNRKSYVMKRANSLQILKTDSSLPFVGSETKQIPI
OmInvs2 VLDAEIPIC-----
SrInvs  SAASTYFKPPNPGRRRRPRGLHATRQRQPAYANMQDPEHMLTLP I IHGTQGSRKNDARLNQAVSLPPV-

```

```

          1480      1490      1500      1510      1520      1530      1540
.....|.....|.....|.....|.....|.....|.....|.....|.....|.....|.....|.....|.....|
MmInvs  -----
DrInvs  -----
HpInvsL -----
SkInvs  -----
AcInvs  -----
ChDgo   PFDGKYLPKRASKTHKETIHEPFVTKTVHSNRDLQNEAALSQRRYTVQGRYRSIEKRKTKIIFKLERIDL
OcInvs1 -----
OlInvs1 -----
OspInvs1 -----
ScInvs1 -----
AqInvs1 -----
EmInvs1 -----
AvInvs1 -----
OmInvs1 -----
OcInvs2 -----
OlInvs2 -----
OspInvs2 -----
ScInvs2 -----
AqInvs2 -----
EmInvs2 PTGIRKSYTAPVQLPLIVNHTQS-----
AvInvs2 LTETKSSFTSLPPIVQK-----
OmInvs2 -----
SrInvs  -----

```

```

.....|.....|.....
MmInvs -----
DrInvs -----
HpInvsL -----
SkInvs -----
AcInvs -----
ChDgo YIYFVMNFSIDAFT
OcInvs1 -----
OlInvs1 -----
OspInvs1 -----
ScInvs1 -----
AqInvs1 -----
EmInvs1 -----
AvInvs1 -----
OmInvs1 -----
OcInvs2 -----
OlInvs2 -----
OspInvs2 -----
ScInvs2 -----
AqInvs2 -----
EmInvs2 -----
AvInvs2 -----
OmInvs2 -----
SrInvs -----

```

Abbreviations. Vertebrate: Dr, *Danio rerio* and Mm, *Mus musculus*. Hexapoda: Dm, *Drosophila melanogaster*. Mollusca: Ac, *Aplysia californica* and Cg, *Crassostrea gigantea*. Ambulacraria: Hp, *Hemicentrotus pulcherrimus*; Sk and *Saccoglossus kowalevskii*. Cnidaria: Ch, *Clytia hemisphaerica*. Porifera: Aq, *Amphimedon queenslandica*; Av, *Aphrocalistes vastus*; Em, *Ephydatia muelleri*; Oc, *Oscarella carmela*; Ol, *Oscarella lobularis*; Om, *Oopsacas minuta*; Osp, *Oscarella sp.*; Sc, *Sycon ciliatum*. Choanoflagellata: Sr, *Salpingoeca rosetta*.

**Figure S2.5: PET family alignment.** Threshold for shading has been fixed at 80% for both identity (black) and similarity (grey).

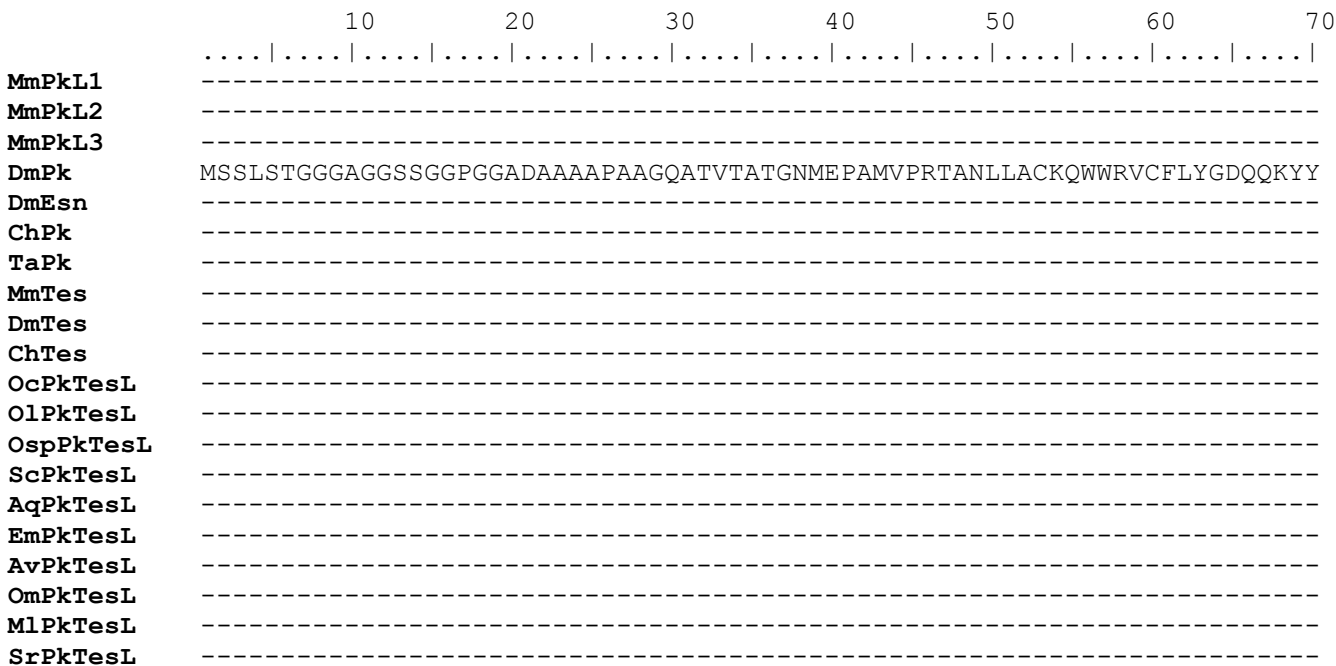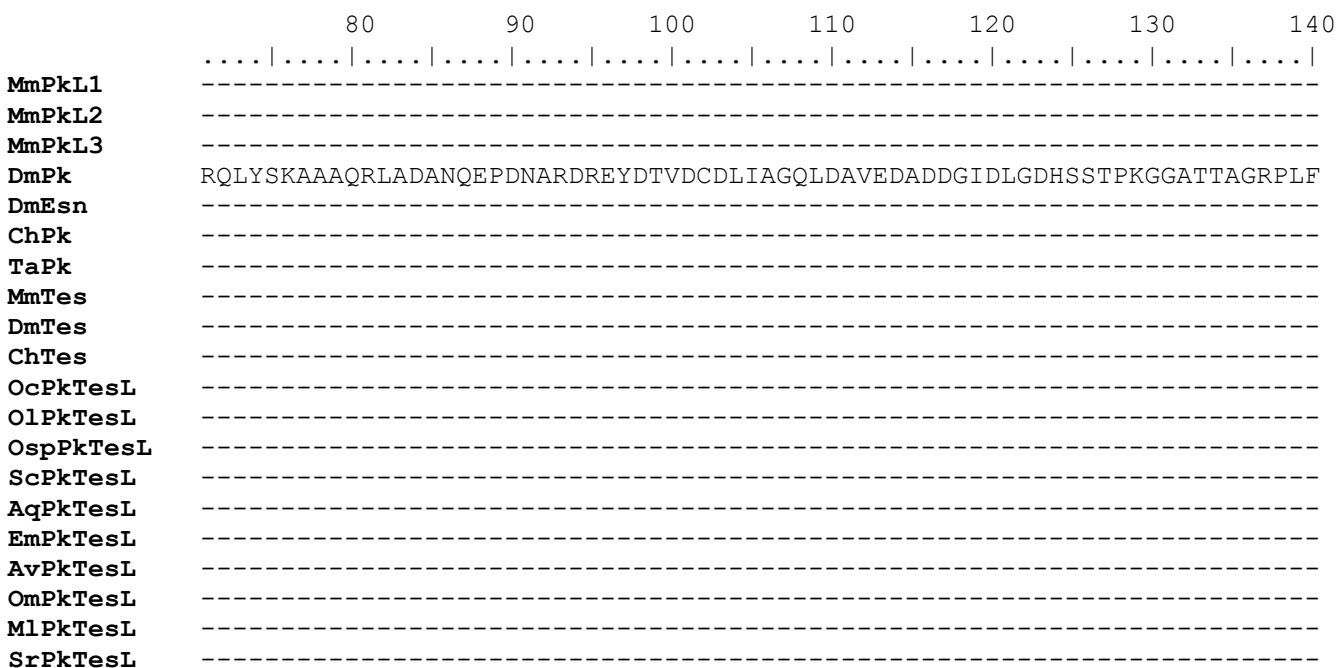

|                  |                                                                        |       |       |       |       |       |       |
|------------------|------------------------------------------------------------------------|-------|-------|-------|-------|-------|-------|
|                  | 150                                                                    | 160   | 170   | 180   | 190   | 200   | 210   |
|                  | .....                                                                  | ..... | ..... | ..... | ..... | ..... | ..... |
| <b>MmPkL1</b>    | -----                                                                  |       |       |       |       |       |       |
| <b>MmPkL2</b>    | -----                                                                  |       |       |       |       |       |       |
| <b>MmPkL3</b>    | -----                                                                  |       |       |       |       |       |       |
| <b>DmPk</b>      | PHSSSPRRSKLLRSLRAHV RGEKLPKNDTTTANESSEVTQRNARVTVLDDPFLFGIDADHLGDLVVRGK |       |       |       |       |       |       |
| <b>DmEsn</b>     | -----                                                                  |       |       |       |       |       |       |
| <b>ChPk</b>      | -----                                                                  |       |       |       |       |       |       |
| <b>TaPk</b>      | -----                                                                  |       |       |       |       |       |       |
| <b>MmTes</b>     | -----                                                                  |       |       |       |       |       |       |
| <b>DmTes</b>     | -----                                                                  |       |       |       |       |       |       |
| <b>ChTes</b>     | -----                                                                  |       |       |       |       |       |       |
| <b>OcPkTesL</b>  | -----                                                                  |       |       |       |       |       |       |
| <b>OlPkTesL</b>  | -----                                                                  |       |       |       |       |       |       |
| <b>OspPkTesL</b> | -----                                                                  |       |       |       |       |       |       |
| <b>ScPkTesL</b>  | -----                                                                  |       |       |       |       |       |       |
| <b>AqPkTesL</b>  | -----                                                                  |       |       |       |       |       |       |
| <b>EmPkTesL</b>  | -----                                                                  |       |       |       |       |       |       |
| <b>AvPkTesL</b>  | -----                                                                  |       |       |       |       |       |       |
| <b>OmPkTesL</b>  | -----                                                                  |       |       |       |       |       |       |
| <b>MLPkTesL</b>  | -----                                                                  |       |       |       |       |       |       |
| <b>SrPkTesL</b>  | -----                                                                  |       |       |       |       |       |       |

|                  |                                                                        |       |       |       |       |       |       |
|------------------|------------------------------------------------------------------------|-------|-------|-------|-------|-------|-------|
|                  | 220                                                                    | 230   | 240   | 250   | 260   | 270   | 280   |
|                  | .....                                                                  | ..... | ..... | ..... | ..... | ..... | ..... |
| <b>MmPkL1</b>    | -----                                                                  |       |       |       |       |       |       |
| <b>MmPkL2</b>    | -----                                                                  |       |       |       |       |       |       |
| <b>MmPkL3</b>    | -----                                                                  |       |       |       |       |       |       |
| <b>DmPk</b>      | RYSTLDATENMARFYAEQEATAQVLEIIEQEEESPEQEAPKPALPPKQKQQRVPVPLPPPPANRVTQDQG |       |       |       |       |       |       |
| <b>DmEsn</b>     | -----MQQAP-----QQQHHP-----PSSYYTQTES                                   |       |       |       |       |       |       |
| <b>ChPk</b>      | -----                                                                  |       |       |       |       |       |       |
| <b>TaPk</b>      | -----                                                                  |       |       |       |       |       |       |
| <b>MmTes</b>     | -----                                                                  |       |       |       |       |       |       |
| <b>DmTes</b>     | -----                                                                  |       |       |       |       |       |       |
| <b>ChTes</b>     | -----                                                                  |       |       |       |       |       |       |
| <b>OcPkTesL</b>  | -----                                                                  |       |       |       |       |       |       |
| <b>OlPkTesL</b>  | -----                                                                  |       |       |       |       |       |       |
| <b>OspPkTesL</b> | -----                                                                  |       |       |       |       |       |       |
| <b>ScPkTesL</b>  | -----                                                                  |       |       |       |       |       |       |
| <b>AqPkTesL</b>  | -----                                                                  |       |       |       |       |       |       |
| <b>EmPkTesL</b>  | -----                                                                  |       |       |       |       |       |       |
| <b>AvPkTesL</b>  | -----                                                                  |       |       |       |       |       |       |
| <b>OmPkTesL</b>  | -----                                                                  |       |       |       |       |       |       |
| <b>MLPkTesL</b>  | -----                                                                  |       |       |       |       |       |       |
| <b>SrPkTesL</b>  | -----                                                                  |       |       |       |       |       |       |

|                  | 290                                                                    | 300   | 310   | 320   | 330   | 340   | 350   |
|------------------|------------------------------------------------------------------------|-------|-------|-------|-------|-------|-------|
|                  | .....                                                                  | ..... | ..... | ..... | ..... | ..... | ..... |
| <b>MmPkL1</b>    | -----                                                                  |       |       |       |       |       |       |
| <b>MmPkL2</b>    | -----                                                                  |       |       |       |       |       |       |
| <b>MmPkL3</b>    | -----                                                                  |       |       |       |       |       |       |
| <b>DmPk</b>      | TQPAAPQVPLQPLTAGDLQFLNLSLRQRSLPRSMKPFKDAHDISFTFNELDTSAEPEVATGAAQQESNEP |       |       |       |       |       |       |
| <b>DmEsn</b>     | -----ELLQIEAGGTGLTFASHSQRPE-----AISQVASTAHLDVPSAASS-----               |       |       |       |       |       |       |
| <b>ChPk</b>      | -----                                                                  |       |       |       |       |       |       |
| <b>TaPk</b>      | -----                                                                  |       |       |       |       |       |       |
| <b>MmTes</b>     | -----                                                                  |       |       |       |       |       |       |
| <b>DmTes</b>     | -----                                                                  |       |       |       |       |       |       |
| <b>ChTes</b>     | -----                                                                  |       |       |       |       |       |       |
| <b>OcPkTesL</b>  | -----                                                                  |       |       |       |       |       |       |
| <b>OlPkTesL</b>  | -----                                                                  |       |       |       |       |       |       |
| <b>OspPkTesL</b> | -----                                                                  |       |       |       |       |       |       |
| <b>ScPkTesL</b>  | -----                                                                  |       |       |       |       |       |       |
| <b>AqPkTesL</b>  | -----                                                                  |       |       |       |       |       |       |
| <b>EmPkTesL</b>  | -----                                                                  |       |       |       |       |       |       |
| <b>AvPkTesL</b>  | -----                                                                  |       |       |       |       |       |       |
| <b>OmpPkTesL</b> | -----                                                                  |       |       |       |       |       |       |
| <b>MLPkTesL</b>  | -----                                                                  |       |       |       |       |       |       |
| <b>SrPkTesL</b>  | -----MEGSKKKKRVGVKFAAEAEVMVHEDP                                        |       |       |       |       |       |       |
|                  | 360                                                                    | 370   | 380   | 390   | 400   | 410   | 420   |
|                  | .....                                                                  | ..... | ..... | ..... | ..... | ..... | ..... |
| <b>MmPkL1</b>    | -----                                                                  |       |       |       |       |       |       |
| <b>MmPkL2</b>    | -----                                                                  |       |       |       |       |       |       |
| <b>MmPkL3</b>    | -----MFARGSRRRRSGRAPPEAEDP                                             |       |       |       |       |       |       |
| <b>DmPk</b>      | ISRTPLTQISYLQKIPTLPRHFSPSGQGLATPPALGSGGMGLPSSSSASALYAAQAAAGILPTSPLPLQR |       |       |       |       |       |       |
| <b>DmEsn</b>     | -----GSGGSAVSGGSGGAPESAGRFVS-----PLQR                                  |       |       |       |       |       |       |
| <b>ChPk</b>      | -----MLPDTSSNNHNNKYSRTKHQHHVTHNNNNNTMVSMTTEQSKEQRSMTSSSSLNEDLYFSATED   |       |       |       |       |       |       |
| <b>TaPk</b>      | -----PAEATRDS                                                          |       |       |       |       |       |       |
| <b>MmTes</b>     | -----MSATHPTRLGTRTKESNACASQGLVR                                        |       |       |       |       |       |       |
| <b>DmTes</b>     | -----MSAVSPNSCVETPKAPEWLSKLESRRQLKRSKLGHEA                             |       |       |       |       |       |       |
| <b>ChTes</b>     | -----MAEEEAVEKEVIKATEITHKLGHER                                         |       |       |       |       |       |       |
| <b>OcPkTesL</b>  | -----MDALQRKKLQSVRIA AVKQGVLFHNV                                       |       |       |       |       |       |       |
| <b>OlPkTesL</b>  | -----MDPAQRKKLESVRKAAVKQGVLFHNV                                        |       |       |       |       |       |       |
| <b>OspPkTesL</b> | -----MADAAQRKKLQSVRKA AVKQGVLFHNV                                      |       |       |       |       |       |       |
| <b>ScPkTesL</b>  | -----MSVRRGMPRANPKTSNHEIVKGFTEFRTRGRTRDPD                              |       |       |       |       |       |       |
| <b>AqPkTesL</b>  | -----MAE-----QKRVNRLPSIRSRAIETGVLVHEV                                  |       |       |       |       |       |       |
| <b>EmPkTesL</b>  | -----MSDS-----NDKGLLKPTRKPTKVYASVRDVAIKKGLLAHEV                        |       |       |       |       |       |       |
| <b>AvPkTesL</b>  | -----MARYLPTKNSITLDVHQDDEFHQAF'TDIKVRDDSTKTDRLNASVRAIADKRGILVHDV       |       |       |       |       |       |       |
| <b>OmpPkTesL</b> | -----MARHSGSQTFADKSMGDEFHQAF'TNFSKG-FASENSTNFASVREIAVKRGILVHDV         |       |       |       |       |       |       |
| <b>MLPkTesL</b>  | -----MAIRPENLTNKTNRETNFCFSKNRGARES                                     |       |       |       |       |       |       |
| <b>SrPkTesL</b>  | SDVPKPSAGKLRRVKVPVKAGDGSKPDADGAQEENEITRKRRLRRKPTVKGANEVIDAGLKQGVLYHDV  |       |       |       |       |       |       |

|                  | 430                                                                   | 440    | 450   | 460          | 470          | 480   | 490                                    |                                      |
|------------------|-----------------------------------------------------------------------|--------|-------|--------------|--------------|-------|----------------------------------------|--------------------------------------|
|                  | .... .... .... .... .... .... .... .... .... .... .... .... .... .... |        |       |              |              |       |                                        |                                      |
| <b>MmPkL1</b>    | -----                                                                 |        |       |              |              |       | MPL                                    | EMEPKMSK                             |
| <b>MmPkL2</b>    | -----                                                                 |        |       |              |              |       | MVT                                    | VMPLEMEKTIISK                        |
| <b>MmPkL3</b>    | ARGQP                                                                 | NSCR   | EQCP  | PGFLLHGWRKI  | QHCKCP       | ---   | REEH-----AVRTVPVDLERIMCR               |                                      |
| <b>DmPk</b>      | HQQYL                                                                 | PPHHQ  | QHPG  | AGMGP        | PGSGAAAGPPL  | ---   | GPQYSPGCSANPKY-----SNAQLPPPPHHHHQL     |                                      |
| <b>DmEsn</b>     | RHCQP                                                                 | PSH    | ---   | ---          | LPL          | ---   | NSVASPLRTASYKS-----AAAVAGHGFFHSHHQ     |                                      |
| <b>ChPk</b>      | DEEML                                                                 | CSKC   | ---   | ---          | RKICRHCRCS   | ---   | REDH-----CLLPPTIQEKTYSIS               |                                      |
| <b>TaPk</b>      | DTGRP                                                                 | CLKCR  | QKCP  | PGFCHHSWRKI  | CRHCKCS      | ---   | KSEH-----DILADDHERFVEKMI               |                                      |
| <b>MmTes</b>     | KPPWANEG                                                              | ---    | ---   | EGFELHFWRKI  | CRNCRNVV     | ---   | KKSMTVLL-----SNEEDRKVGR                |                                      |
| <b>DmTes</b>     | GAGAP                                                                 | CAECK  | DKCP  | PGLDLHFWRKV  | CRNCKCP      | ---   | KIQHVCPCD-----DDD-----                 |                                      |
| <b>ChTes</b>     | GHGAE                                                                 | CLKCG  | PKCE  | GLDLHFWRKI   | CKNCYCR      | ---   | YDEHDVKS-----EEEIHHGIVK                |                                      |
| <b>OcPkTesL</b>  | DAGAP                                                                 | CMKCG  | DGCI  | GFELHYWRKI   | CKNCRCK      | ---   | REEH-----DIKVEEDA                      |                                      |
| <b>OlPkTesL</b>  | DAGAP                                                                 | CLKCG  | DACV  | GFELHYWRKI   | CKNCRCK      | ---   | REEH-----DIKAEENA                      |                                      |
| <b>OspPkTesL</b> | DAGAP                                                                 | CVKCG  | DNCI  | GFELHFWRKI   | CKNCHCK      | ---   | REEH-----DIKAEEDA                      |                                      |
| <b>ScPkTesL</b>  | EKGEP                                                                 | CKT    | CGPHI | CPGFQLHFWRKV | QYCRCP       | ---   | ESEH-----MSAKTLDNMEEATR                |                                      |
| <b>AqPkTesL</b>  | DEGSP                                                                 | CLRC   | DNCE  | KASCF        | FARKICANCCCP | ---   | REEH-----DIRPHEER                      |                                      |
| <b>EmPkTesL</b>  | DEGTP                                                                 | CLVCG  | DKCP  | GFSLHFWRKV   | CKNCLCP      | ---   | REEH-----DVKEDNKE                      |                                      |
| <b>AvPkTesL</b>  | DAGR                                                                  | PCIKCG | VKCP  | GFSLHFWRKI   | CLHCKCP      | ---   | RMDH-----DIQEYESH                      |                                      |
| <b>OmPkTesL</b>  | DAGR                                                                  | PCMKCG | DKCP  | GFALHFWRKV   | CRHCKCP      | ---   | WMEH-----DIHLIDEL                      |                                      |
| <b>MLPkTesL</b>  | DYSE                                                                  | ---    | ---   | ---          | ---          | ---   | DSSDSESH-----QQAAPPKPLRRNPGSFDDLTQG    |                                      |
| <b>SrPkTesL</b>  | DKGQP                                                                 | CFS    | CD-N  | CPGFEMHFWRKI | CTKCGCP      | ---   | KSSHGFKELPTRSVGKLSGYDMYQQGTPNEDVRA     |                                      |
|                  | 500                                                                   | 510    | 520   | 530          | 540          | 550   | 560                                    |                                      |
|                  | .... .... .... .... .... .... .... .... .... .... .... .... ....      |        |       |              |              |       |                                        |                                      |
| <b>MmPkL1</b>    | -----                                                                 |        |       |              |              |       | LVFG                                   | QRSSTSDDDSGCALEEY-----               |
| <b>MmPkL2</b>    | -----                                                                 |        |       |              |              |       | LMFD                                   | QRSSTSDDDSGCALEEY-----               |
| <b>MmPkL3</b>    | -----                                                                 |        |       |              |              |       | LISD                                   | FQRHSISDDDDSGCASEEY-----             |
| <b>DmPk</b>      | SPAL                                                                  | STP    | SPPS  | LLHHP        | PAGGTSS      | SASAH | PFLGGPHMDMQRQSHSDDDDSGCALEEY-----      |                                      |
| <b>DmEsn</b>     | -----                                                                 |        |       |              |              |       | QLDF                                   | QRNSQSDDDDSGCALEEY-----              |
| <b>ChPk</b>      | -----                                                                 |        |       |              |              |       | KFAD                                   | QHPSSMGNDGDSGCSTEEY-----             |
| <b>TaPk</b>      | -----                                                                 |        |       |              |              |       | FEYY                                   | KVNGLSDFNINPAIEEY-----               |
| <b>MmTes</b>     | L                                                                     | ---    | ---   | ---          | ---          | ---   | FEDTKYTTLIAKLSDGIPMYKRNVMILT-----      |                                      |
| <b>DmTes</b>     | -----                                                                 |        |       |              |              |       | ATG                                    | WAQFEILGQIRAKPAYIK-----              |
| <b>ChTes</b>     | N                                                                     | ---    | ---   | ---          | ---          | ---   | IFRKERGLSDEIGKLQIFDPEKQ-----           |                                      |
| <b>OcPkTesL</b>  | -----                                                                 |        |       |              |              |       | ETKR                                   | MIKNLFSDNPSPAVKKKNE-----             |
| <b>OlPkTesL</b>  | -----                                                                 |        |       |              |              |       | ETKR                                   | MIKNLFSDNPSVVPKTE-----               |
| <b>OspPkTesL</b> | -----                                                                 |        |       |              |              |       | ETKR                                   | MIRSLFSDNPSPIVQRKTE-----             |
| <b>ScPkTesL</b>  | L                                                                     | ---    | ---   | ---          | ---          | ---   | TLNGLFKVDNYDEMSGSTQVDNVSKSTSGTQVLSTLD- |                                      |
| <b>AqPkTesL</b>  | -----                                                                 |        |       |              |              |       | QAA                                    | -VGKLLFHSNSDAKAMVKDAASKSPQRPRATIPHI  |
| <b>EmPkTesL</b>  | -----                                                                 |        |       |              |              |       | GMS                                    | -VGKLLFAPTAEALAKGSSIDISPSP-KLRRPLTKE |
| <b>AvPkTesL</b>  | -----                                                                 |        |       |              |              |       | RTN                                    | -FEIIFYFPQDLNPG-----                 |
| <b>OmPkTesL</b>  | -----                                                                 |        |       |              |              |       | GTK                                    | -VQNYFSLD-----                       |
| <b>MLPkTesL</b>  | -----                                                                 |        |       |              |              |       | DIVD                                   | YTTTVSPSGEYPGSATLQRK-----            |
| <b>SrPkTesL</b>  | -----                                                                 |        |       |              |              |       | RVRR                                   | IREQRGDQVDGEMTVEDVEEAVRQLNNEAVDD     |

```

          570      580      590      600      610      620      630
...|...|...|...|...|...|...|...|...|...|...|...|...|...|...|
MmPkL1  -----AWVPPGLRPEQIQLYFACLPEEKVPYVNSPGEKHKRIKQLLYQLPPHDNEVRYC
MmPkL2  -----AWVPPGLKPEQVHQYYSCLPEEKVPYVNSAGEKLRKQLLHQLPPHDNEVRYC
MmPkL3  -----AWVPPGLKPEQVYQFSCLPEDKVPYVNSPGEKYRIKQLLHQLPPHDSEAQYC
DmPk    -----TWVPPGLRPDQVRLYFSQIPDDKVPYVNSPGEQYRVRQLLHQLPPHDNEVRYC
DmEsn  -----TWVPPGLRPDQVRLYFSQLPEDKVPYVNSPGEKYRVKQLLHQLPPQDNEVRYC
ChPk   -----AWVPPGVSGELVNAYMNSLHEDKIPFVNSIGENYRAKQLLYQLPPHDSDSKHC
TaPk   -----AWTPPALSIRQIEAYFDCLPKENVPIIDSVGDRYRIQQLLYQHHPAHDYDPKFC
MmTes  -NPVAAKKNVSINTVTYEWAPPVQNALARQYMQMLPKBKQPVAGSEGAQYRKKQLAKQLPAHDQDPSKC
DmTes  -----IKALASQPVQLEWVPPNAAPDVVTDYMEKLGTAQIPVAGSDAALKRKMQLQLVPPHDLDAALC
ChTes  -----PAIAEQVKANFIKVEVSSPFAMSKYLKQLPKBKDAFQGEAGQQYRNHQLQQQLPAHDFDPAFC
OcPkTesL -----KDMMELNARYAWAP-DVEKDLAVKYMESLPEEKVPLKGTGDKHYRRDQLINQLPVHDNDASKC
OlPkTesL -----QETIELDARFAWTP-NVGKDLAVKYMEALPEDKVPVKGTGDKYRRDQLFNQLPVHDNDVTQC
OspPkTesL -----QEKIELDARFAWTP-DVEKDLAVKYMESLPEEKVTKGTGDKYRRDQLFNQLPVHDNDASRC
ScPkTesL GSRKG-SSAQVSNCEQLKKIKTGTTKNLVAKFMENLPE----EEKEEGATYRQKQLMLPAHDIDGKAC
AqPkTesL PKQESSESPSILRRTENFTWTIPRDTTVEAARSFFANLPONKPKVAGMAGDRYWQKQKIRQLPAHDIDLICY
EmPkTesL PSQDS--PASVKKMNLYSWVVKGATPEAMEKFVESLPETKREPKGTAGERYHHKQLIRQLPAHDIAITYC
AvPkTesL -----DKFDLLNWIIPKGITKQLIDAYLSSLPKDKNPLE-PRGRIYRNQQFVYQLPKHDTFVIEH
OmPkTesL -----EKYDHMNWIIPKGLTKQLIEVYLNSLPQDKNPSR-PCGINYRHRQLIYQLPEHDTFLYER
MLPkTesL -----GSPGVWVPPGIDHNLVKQYLAALPEDKRP-VNTLGVQWRKQLQTQLPRYDHNINICY
SrPkTesL GGDNN-DNDDGHGDDDDDMETGELMGFEAPELTDLPE----MESFEDVSDDDDDGDDGDDGDDGDDG

```

```

          640      650      660      670      680      690      700
...|...|...|...|...|...|...|...|...|...|...|...|...|...|...|
MmPkL1  Q--SLSEEEKKELQVFSASA-----
MmPkL2  N--SLDEEEKRELKLFNSN-----
MmPkL3  T--ALEEEEEKRELRAFSQ-----
DmPk    H--SLTDEERKELRLFST-----
DmEsn  H--SLSDEERKELRIFSA-----
ChPk   H--NLSEEEKRELRSFHG-----
TaPk   Y--RLSEEEKKKHRQFSA-----
MmTes  H--ELSPKEVKEMEQQFVKKYKSEALG-----
DmTes  D--GLTETEAIQLQQYVQKLREQCQVGVVRLGDRLNHAQVEHVAPALMPTQEAQQTWQSLGLMPVADD
ChTes  N--KLSDQEKDRMQKFTD-VRDDDAG-----
OcPkTesL D--NLTPAERELMEEFVE-----
OlPkTesL D--NLTDAREQMHEFVL-----
OspPkTesL D--NLNDAEREQMEEFVL-----
ScPkTesL K-TLMTTEEKQEMEEER-----
AqPkTesL N--ELTDEECKQMELEFIK-----
EmPkTesL NEEDLSPEDCKQMEIFHK-----
AvPkTesL NKCNLSENEFEQVRAFIQ-----
OmPkTesL NREKLTDIQFQVRAFIQ-----
MLPkTesL H--EMSPPEEQEELFMFVE-----
SrPkTesL D-VQGQEGEKEKEEEEEVKAEPEPEPEPEPEPEPPKGPSDAILLKKYTWVPDGLCDDDIERYFKAFPRDIV

```



|                  |                                                                                           |     |     |     |     |     |     |
|------------------|-------------------------------------------------------------------------------------------|-----|-----|-----|-----|-----|-----|
|                  | 710                                                                                       | 720 | 730 | 740 | 750 | 760 | 770 |
|                  | ..... ..... ..... ..... ..... ..... ..... ..... ..... ..... ..... ..... ..... ..... ..... |     |     |     |     |     |     |
| <b>MmPkL1</b>    | -----                                                                                     |     |     |     |     |     |     |
| <b>MmPkL2</b>    | -----                                                                                     |     |     |     |     |     |     |
| <b>MmPkL3</b>    | -----                                                                                     |     |     |     |     |     |     |
| <b>DmPk</b>      | -----                                                                                     |     |     |     |     |     |     |
| <b>DmEsn</b>     | -----                                                                                     |     |     |     |     |     |     |
| <b>ChPk</b>      | -----                                                                                     |     |     |     |     |     |     |
| <b>TaPk</b>      | -----                                                                                     |     |     |     |     |     |     |
| <b>MmTes</b>     | -----                                                                                     |     |     |     |     |     |     |
| <b>DmTes</b>     | TLNELLANPKVAQALASPASAHPKLLVAFSEPLCESTAQFEENGALRAQTREKLLGISKPALLSLVTHGI                    |     |     |     |     |     |     |
| <b>ChTes</b>     | -----                                                                                     |     |     |     |     |     |     |
| <b>OcPkTesL</b>  | -----                                                                                     |     |     |     |     |     |     |
| <b>OlPkTesL</b>  | -----                                                                                     |     |     |     |     |     |     |
| <b>OspPkTesL</b> | -----                                                                                     |     |     |     |     |     |     |
| <b>ScPkTesL</b>  | -----                                                                                     |     |     |     |     |     |     |
| <b>AqPkTesL</b>  | -----                                                                                     |     |     |     |     |     |     |
| <b>EmPkTesL</b>  | -----                                                                                     |     |     |     |     |     |     |
| <b>AvPkTesL</b>  | -----                                                                                     |     |     |     |     |     |     |
| <b>OmPkTesL</b>  | -----                                                                                     |     |     |     |     |     |     |
| <b>MLPkTesL</b>  | -----                                                                                     |     |     |     |     |     |     |
| <b>SrPkTesL</b>  | PLRGSPGAGWRLRQLEI-----                                                                    |     |     |     |     |     |     |

|                  |                                                                                     |     |     |     |     |     |     |
|------------------|-------------------------------------------------------------------------------------|-----|-----|-----|-----|-----|-----|
|                  | 780                                                                                 | 790 | 800 | 810 | 820 | 830 | 840 |
|                  | ..... ..... ..... ..... ..... ..... ..... ..... ..... ..... ..... ..... ..... ..... |     |     |     |     |     |     |
| <b>MmPkL1</b>    | -----                                                                               |     |     |     |     |     |     |
| <b>MmPkL2</b>    | -----                                                                               |     |     |     |     |     |     |
| <b>MmPkL3</b>    | -----                                                                               |     |     |     |     |     |     |
| <b>DmPk</b>      | -----                                                                               |     |     |     |     |     |     |
| <b>DmEsn</b>     | -----                                                                               |     |     |     |     |     |     |
| <b>ChPk</b>      | -----                                                                               |     |     |     |     |     |     |
| <b>TaPk</b>      | -----                                                                               |     |     |     |     |     |     |
| <b>MmTes</b>     | -----                                                                               |     |     |     |     |     |     |
| <b>DmTes</b>     | VYDKVLGILQEKKLNISRDPKLGPIAEFRKEYVNNPQFRAEINTICPQPPMTPIKSPPGTPFNSPLPLKN              |     |     |     |     |     |     |
| <b>ChTes</b>     | -----                                                                               |     |     |     |     |     |     |
| <b>OcPkTesL</b>  | -----                                                                               |     |     |     |     |     |     |
| <b>OlPkTesL</b>  | -----                                                                               |     |     |     |     |     |     |
| <b>OspPkTesL</b> | -----                                                                               |     |     |     |     |     |     |
| <b>ScPkTesL</b>  | -----                                                                               |     |     |     |     |     |     |
| <b>AqPkTesL</b>  | -----                                                                               |     |     |     |     |     |     |
| <b>EmPkTesL</b>  | -----                                                                               |     |     |     |     |     |     |
| <b>AvPkTesL</b>  | -----                                                                               |     |     |     |     |     |     |
| <b>OmPkTesL</b>  | -----                                                                               |     |     |     |     |     |     |
| <b>MLPkTesL</b>  | -----                                                                               |     |     |     |     |     |     |
| <b>SrPkTesL</b>  | -----                                                                               |     |     |     |     |     |     |

|                  |                                                                        |       |       |       |       |       |       |
|------------------|------------------------------------------------------------------------|-------|-------|-------|-------|-------|-------|
|                  | 850                                                                    | 860   | 870   | 880   | 890   | 900   | 910   |
|                  | .....                                                                  | ..... | ..... | ..... | ..... | ..... | ..... |
| <b>MmPkL1</b>    | -----                                                                  |       |       |       |       |       |       |
| <b>MmPkL2</b>    | -----                                                                  |       |       |       |       |       |       |
| <b>MmPkL3</b>    | -----                                                                  |       |       |       |       |       |       |
| <b>DmPk</b>      | -----                                                                  |       |       |       |       |       |       |
| <b>DmEsn</b>     | -----                                                                  |       |       |       |       |       |       |
| <b>ChPk</b>      | -----                                                                  |       |       |       |       |       |       |
| <b>TaPk</b>      | -----                                                                  |       |       |       |       |       |       |
| <b>MmTes</b>     | -----VHNCGN-----RHAPAAV                                                |       |       |       |       |       |       |
| <b>DmTes</b>     | PVQIRMGAQMRQDTPMRRVKFGGVSTIVYDCGLPANTDYDRDPVFAQILQAEPLKHAFQEARAGRAPSSV |       |       |       |       |       |       |
| <b>ChTes</b>     | -----                                                                  |       |       |       |       |       |       |
| <b>OcPkTesL</b>  | -----                                                                  |       |       |       |       |       |       |
| <b>OlPkTesL</b>  | -----                                                                  |       |       |       |       |       |       |
| <b>OspPkTesL</b> | -----                                                                  |       |       |       |       |       |       |
| <b>ScPkTesL</b>  | -----                                                                  |       |       |       |       |       |       |
| <b>AqPkTesL</b>  | -----                                                                  |       |       |       |       |       |       |
| <b>EmPkTesL</b>  | -----                                                                  |       |       |       |       |       |       |
| <b>AvPkTesL</b>  | -----                                                                  |       |       |       |       |       |       |
| <b>OmPkTesL</b>  | -----                                                                  |       |       |       |       |       |       |
| <b>MLPkTesL</b>  | -----                                                                  |       |       |       |       |       |       |
| <b>SrPkTesL</b>  | -----                                                                  |       |       |       |       |       |       |

|                  |                                                                        |       |       |       |       |       |       |
|------------------|------------------------------------------------------------------------|-------|-------|-------|-------|-------|-------|
|                  | 920                                                                    | 930   | 940   | 950   | 960   | 970   | 980   |
|                  | .....                                                                  | ..... | ..... | ..... | ..... | ..... | ..... |
| <b>MmPkL1</b>    | -----                                                                  |       |       |       |       |       |       |
| <b>MmPkL2</b>    | -----                                                                  |       |       |       |       |       |       |
| <b>MmPkL3</b>    | -----                                                                  |       |       |       |       |       |       |
| <b>DmPk</b>      | -----                                                                  |       |       |       |       |       |       |
| <b>DmEsn</b>     | -----                                                                  |       |       |       |       |       |       |
| <b>ChPk</b>      | -----                                                                  |       |       |       |       |       |       |
| <b>TaPk</b>      | -----                                                                  |       |       |       |       |       |       |
| <b>MmTes</b>     | ASK-----                                                               |       |       |       |       |       |       |
| <b>DmTes</b>     | VISNIPAPVASLAELRGLNPATRAQLQSVGLDKNMLQSAVSNAPYYDRLFRSLHDKGISHDQCHLLQPMK |       |       |       |       |       |       |
| <b>ChTes</b>     | -----                                                                  |       |       |       |       |       |       |
| <b>OcPkTesL</b>  | -----                                                                  |       |       |       |       |       |       |
| <b>OlPkTesL</b>  | -----                                                                  |       |       |       |       |       |       |
| <b>OspPkTesL</b> | -----                                                                  |       |       |       |       |       |       |
| <b>ScPkTesL</b>  | -----                                                                  |       |       |       |       |       |       |
| <b>AqPkTesL</b>  | -----                                                                  |       |       |       |       |       |       |
| <b>EmPkTesL</b>  | -----                                                                  |       |       |       |       |       |       |
| <b>AvPkTesL</b>  | -----                                                                  |       |       |       |       |       |       |
| <b>OmPkTesL</b>  | -----                                                                  |       |       |       |       |       |       |
| <b>MLPkTesL</b>  | -----                                                                  |       |       |       |       |       |       |
| <b>SrPkTesL</b>  | -----                                                                  |       |       |       |       |       |       |

|                  | 990                                                                      | 1000  | 1010 | 1020 | 1030                                   | 1040  | 1050 |      |
|------------------|--------------------------------------------------------------------------|-------|------|------|----------------------------------------|-------|------|------|
|                  | .... .... .... .... .... .... .... .... .... .... .... .... .... ....    |       |      |      |                                        |       |      |      |
| <b>MmPkL1</b>    | -----                                                                    |       |      |      |                                        |       |      |      |
| <b>MmPkL2</b>    | -----                                                                    |       |      |      |                                        |       |      |      |
| <b>MmPkL3</b>    | -----                                                                    |       |      |      |                                        |       |      |      |
| <b>DmPk</b>      | -----                                                                    |       |      |      |                                        |       |      |      |
| <b>DmEsn</b>     | -----                                                                    |       |      |      |                                        |       |      |      |
| <b>ChPk</b>      | -----                                                                    |       |      |      |                                        |       |      |      |
| <b>TaPk</b>      | -----                                                                    |       |      |      |                                        |       |      |      |
| <b>MmTes</b>     | -----                                                                    |       |      |      |                                        |       |      |      |
| <b>DmTes</b>     | QVHDWLLDDDQLLDEIDKVFADMANGCKDISYPKPSLGE LPTSQSSDSGFHSKPPTPGYGS EDLTAGQGR |       |      |      |                                        |       |      |      |
| <b>ChTes</b>     | -----                                                                    |       |      |      |                                        |       |      |      |
| <b>OcPkTesL</b>  | -----                                                                    |       |      |      |                                        |       |      |      |
| <b>OlPkTesL</b>  | -----                                                                    |       |      |      |                                        |       |      |      |
| <b>OspPkTesL</b> | -----                                                                    |       |      |      |                                        |       |      |      |
| <b>ScPkTesL</b>  | -----                                                                    |       |      |      |                                        |       |      |      |
| <b>AqPkTesL</b>  | -----                                                                    |       |      |      |                                        |       |      |      |
| <b>EmPkTesL</b>  | -----                                                                    |       |      |      |                                        |       |      |      |
| <b>AvPkTesL</b>  | -----                                                                    |       |      |      |                                        |       |      |      |
| <b>OmPkTesL</b>  | -----                                                                    |       |      |      |                                        |       |      |      |
| <b>MLPkTesL</b>  | -----                                                                    |       |      |      |                                        |       |      |      |
| <b>SrPkTesL</b>  | -----                                                                    |       |      |      |                                        |       |      |      |
|                  |                                                                          | 1060  | 1070 | 1080 | 1090                                   | 1100  | 1110 | 1120 |
|                  | .... .... .... .... .... .... .... .... .... .... .... .... ....         |       |      |      |                                        |       |      |      |
| <b>MmPkL1</b>    | -----                                                                    |       |      |      | RAVMHAVCEQCGLQMNNGEVAVFASRAG           | ----- | P    |      |
| <b>MmPkL2</b>    | -----                                                                    |       |      |      | VTMTGAIICEQCGGQIKGGDI AVFASRAG         | ----- | H    |      |
| <b>MmPkL3</b>    | -----                                                                    |       |      |      | VTITGAIICEQCGKQIGGDI AVFASRAG          | ----- | L    |      |
| <b>DmPk</b>      | -----                                                                    |       |      |      | SARP---CDGCDDL ISTGDI AVFATRLG         | ----- | P    |      |
| <b>DmEsn</b>     | -----                                                                    |       |      |      | DERP---CKGCEEPLSGGDI VVFAQRLG          | ----- | A    |      |
| <b>ChPk</b>      | -----                                                                    |       |      |      | AEGSSGVCQQCSKRIVPGEVVHAWRAG            | ----- | K    |      |
| <b>TaPk</b>      | -----                                                                    |       |      |      | SRMNGHECAECGEQLNHGELGLFASHAVP          | ----- | E    |      |
| <b>MmTes</b>     | -----                                                                    |       |      |      | DKSAESKKTQYSCYCKHTTNEGEPAIYAERAGY      | ----- |      |      |
| <b>DmTes</b>     | FASIPGIEDMNMYPSCAGMPEQFQQLRLHGD EASGKNSTR TILCADCNQPIAMGEVAVKADRAGK      | ----- |      |      |                                        |       |      |      |
| <b>ChTes</b>     | -----                                                                    |       |      |      | EKTHWKCEKCGENLMICEVAI FAEKAGK          | ----- |      |      |
| <b>OcPkTesL</b>  | -----                                                                    |       |      |      | ESK-WKCSECN ETIESGSCAVFADKAAD          | ----- |      |      |
| <b>OlPkTesL</b>  | -----                                                                    |       |      |      | ESDGWTCAE CRKGL ESGSVAVFADRAGDD        | ----- |      |      |
| <b>OspPkTesL</b> | -----                                                                    |       |      |      | ESSGWVCEE CRKPLES GSCAVFADRAGEN        | ----- |      |      |
| <b>ScPkTesL</b>  | -----                                                                    |       |      |      | VEEVWDCQEC TDTLKKGETAIFTDKTGGER        | ----- |      |      |
| <b>AqPkTesL</b>  | -----                                                                    |       |      |      | CVCKRCCVTFKKGESAVIADKLSGSD             | ----- |      |      |
| <b>EmPkTesL</b>  | -----                                                                    |       |      |      | LSTQWVCVSKIPMKTGDVAVFAERAKG            | ----- |      |      |
| <b>AvPkTesL</b>  | -----                                                                    |       |      |      | LAWNCSGCTKPLKIGDAAIMLDESAR             | ----- | S    |      |
| <b>OmPkTesL</b>  | -----                                                                    |       |      |      | LALNCS CDHSLKIGDAAIMVDEIP              | ----- | P    |      |
| <b>MLPkTesL</b>  | -----                                                                    |       |      |      | KKS KKK-CDKCGGLVDCAVIADKIP             | ----- |      |      |
| <b>SrPkTesL</b>  | -----                                                                    |       |      |      | DSGVAVVIDSPRICFRGQGLFPGLAVTTERIVDETGQT | ----- |      |      |

```

          1130      1140      1150      1160      1170      1180      1190
...|...|...|...|...|...|...|...|...|...|...|...|...|...|...|...|
MmPkL1  GVCWHPSCFVCFVTCNELLVLDLIYFYQDG--KIHCGRHHAE-LLKPRCSACDEIIFADECTEAEGRHWHMK
MmPkL2  GICWHPPCFVCTVCNELLVLDLIYFYQDG--KIYCGRHHAE-CLKPRCAACDEIIFADECTEAEGRHWHMR
MmPkL3  GACWHPQCFVCTTCQELLVLDLIYFYHAG--KVYCGRHHAE-CLRPRCAACDEIIFSPECTEAEGRHWHMG
DmPk    NASWHPACFACSVCRELLVLDLIYFHRDG--RMYCGRHHAE-TLKPRCSACDEIIFLADECTEAEGRAWHMN
DmEsn  QLCWHPGCFVCSVKKELLVLDLIYFQRDG--NLYCGRHHAE-TQKPRCSACDEIIFSDECTEAEGRTWMMK
ChPk   EACWHPACFQCTTCQELLVLDLIYFYQEG--RVYCGRHHAE-LLKPRCSACDEIIFSDECTEAEGRFWHLG
TaPk   NLVWHPEFCFICCVCEGLVLDLIYFYKDG--EVYCGRHHAD-SVKPRCNACDEIIFTEECIOAHGRTWHTD
MmTes  DKLWHPACFICSTCGELLVDMYFVKNG--KLYCGRHYCD-SEKPRCAGCDELIFSNEYTQAEHGRWHLK
DmTes  EIAWHPGCFKCIITCRELLADLIYFFHQG--QVFCGRDLAIRLKIIPRCACDELIFTKKEYTAAEATFHNIK
ChTes  DKCWHPNCFVCDTCQELLVLDLIYVFKDG--KIFCGRHYGE-ITRVPRCAACDELIFTKKEYTQAEQDNWHLQ
OcPkTesL  -MCWHPKCFVCKCKKELLVLDLIYFWKDE--HIYCGRHHAE-LVKPRCAACDELIFSKEYTRAEDKNWHLR
OlPkTesL  -RCWHPGCFVCSKCKKELLVLDLIYFWHGD--KLYCGRHHAE-LVKPRCAACDELIFSKEYTRAEDKNWHLR
OspPkTesL  -ACWHPGCFVCSQCKKELLVLDLIYFWRDG--KLYCGRHHAE-LVKPRCAACDELIFSKEYTHAEDKNWHLR
ScPkTesL  --CWHAKCFVCFKCKKELLVLDLIYFHKDD--HVYCGRHHAE-LVKPRCKACDELIFTEGYTHAEDADWHIV
AqPkTesL  -NMYHPACFTCTDCNELLIETLIYFVYED--KLYCGRHHSE-KMKPRCAACDEMIFFCEYTRAEDQNWHVN
EmPkTesL  -MCWHPACFTCSDCNELLAQLIYFWDEKEHKIYCGRHHAE-IMKPRCAACDELIVCPEFTRAEQNWHLN
AvPkTesL  -IFFHHAHCFICSDCKKELLVLDLIYFYNSG--KLYCGRHHAE-TIKPRCAACDELIFSKEFTKAEGLNWHLQ
OmPkTesL  -IFFHHPHCFICNICCKKELLVLDLIYFISNN--KLYCGRHHAE-TLKPRCAACDELIFSKEFTRAEGLNWHLH
MLPkTesL  GRVWHPGCFSCCTTCCEVLVLDLIYFYQDG--RLYCGRHHAE-LLRPRCHACDELIFGQEFITADKHEYHKE
SrPkTesL  AVYHHDTCFVCEACDSPLADLFCFVTPPEE-QLVCGRHYAD-LYRPRCHACDELIFDQDYAFAEHNWHRE

```

```

          1200      1210      1220      1230      1240      1250      1260
...|...|...|...|...|...|...|...|...|...|...|...|...|...|...|...|
MmPkL1  HFCCLECEETVLGGQ-RYIMKD--GRPFCCGCFESLYAEYCETCGEHI GVDHAQMT---YDGQHWHATEAC
MmPkL2  HFCCFECETVLGGQ-RYIMKE--GRPYCCHCFESLYAEYCDTCAQHI GIDQGMQMT---YDGQHWHATETC
MmPkL3  HFCCFECETASLGGQ-RYVMRQ--SRPHCCACYEARHAEYCDGCGEHI GLDQGMQMA---YEGQHWHASDRC
DmPk    HFACHECDKQLGGQ-RYIMRE--GKPYCLHCFDAMFAEYCDYCGEAI GVDQGMQMS---HDGQHWHATDEC
DmEsn  HFACQECEHQLGGQ-RYIMRE--GKPYCLACFDTMFAEYCDYCGEVI GVDQGMQMS---HDGQHWHATDQC
ChPk   HFACYECCDSSLGGQ-RYVMRD--NHPICCVCFEKMFAEFCDSGGEPI GIDVGMQMA---HGSQHWHANKEK
TaPk   HFVQYECECRLSRNQYIMRD--GQPYCCRCFESLYAVYCESCGEMI ELNDGHMA---HNDMHWHASDDC
MmTes  HFCCFDCHDILAGK-IYVMVT--DKPVCKPCYVKNHAVVCQGCHNAI DPEVQRVT---YNNFSWHASTECC
DmTes  HFCCYQCCDEPLAGQ-QYIADKSNMPLCLLCYDRLFVAVRCQRCKVAI G PADQGVA---WGDVHWHASCFV
ChTes  HFCCCLKCDKMLGGQ-KYVARD--GKPYCMGCYDTTFAKTCQTCKQRI AADAKRVS---YKDANWHASEEC
OcPkTesL  HFCCFECDAQLGGK-RYISQE--SHPYCLECFDKRFSSKCCQSCGKPI PADTPHILT---HGKFSWHGMDDC
OlPkTesL  HFCCFECDVQLGGK-RYVSHE--NHPYCLDCFDRRFSSKVCQSCGNAI PADAPHILT---HGEQNWGHGTEQC
OspPkTesL  HFCCFECDTQLGGK-RYVSHD--GHPYCLECFDRRFSSKLCQRCGKPI PADKPHILT---HGNYSWHGTEEC
ScPkTesL  HFCCWRCDELLGGK-RYISRE--GHPHCLGCFDKEFGKKNCTCNKAI AADESHILT---HKDMTWHGNDEC
AqPkTesL  HFCCHRCDSYLGGQ-TYMAKE--TQPYCLKCYELLFANICTACGSTI SLDEPVLK---HEGKYWHARAEC
EmPkTesL  HFCCLRCDAGLAGK-EYRPQD--GKPYCIQCYDLVFSSTVCETCGMTI SLDQPRLV---HNNVTWHGDSKC
AvPkTesL  HFCCIDCDTLGGK-KYMVADN-GHPYCLICFANLYSKGCATCGNFI RVDDPRLS---HGEFDWHGSPLC
OmPkTesL  HFCCIECDLGGG-KYMVADN-GHPYCLLFCFSLRFSKGCSTCGSFI GVDDPRLS---HGDFDWHGTSVC
MLPkTesL  HFCCWECDTGLGGA-KYVSHK--GQPYCQGCYELKFCRTRCVTCREPI GAGAPLFK---HGALRWHGNPQC
SrPkTesL  HFCCYRCDAHLIGK-DYIALS--GEPVCLDCFDEFABERCAACHQPII GVNEQKVTGDKRRGKVVHRS--C

```

|                  | 1270                                                                                      | 1280                                       | 1290 | 1300 | 1310 | 1320 | 1330 |
|------------------|-------------------------------------------------------------------------------------------|--------------------------------------------|------|------|------|------|------|
|                  | ..... ..... ..... ..... ..... ..... ..... ..... ..... ..... ..... ..... ..... ..... ..... |                                            |      |      |      |      |      |
| <b>MmPkL1</b>    | FSCAQCKASLLGCPFLPKQGQIYCSKTC                                                              | SLGEDIHASDSSDSAFQSARSRDSRRSVRMGRSSRSADQCRQ |      |      |      |      |      |
| <b>MmPkL2</b>    | FCCAHCCKSLGRPEFLPKQGQIFCSRACS                                                             | SAGEDPNGSDSSDSAFQNAKESRRSAKIGKNKGKTEEA--   |      |      |      |      |      |
| <b>MmPkL3</b>    | FCCSRCSRPLGRPEFLPRRGLIFCSRACS                                                             | SLGSETTAPGPG-----RRSWSAG-----              |      |      |      |      |      |
| <b>DmPk</b>      | FSCNTRCRSLLGRAFLPRRGAIYCSIACS                                                             | SKGEPPTPSDSSGTGMYTTPPTQVRPHQPAPLPARIPSS    |      |      |      |      |      |
| <b>DmEsn</b>     | FSCCTCRSLLGRPEFLPRRGTIYCSIACS                                                             | SKGEPPTPSDTSSG---PQLRPHRSTSSQIAKSPRRGGE    |      |      |      |      |      |
| <b>ChPk</b>      | FSCFNCGQTLGQPFLLPKNGEIFCSSGC                                                              | SRGIPPNPNVNPKYPPRSASRNRSYRPSSESSNNNSRDGYVS |      |      |      |      |      |
| <b>TaPk</b>      | FSCSECNQSLIGKTFLLPKHGKLYCSVAC                                                             | FKIGRMPSEYGGSEESLVEYSDCDINHPQPPTSSVKDIGVGI |      |      |      |      |      |
| <b>MmTes</b>     | FLCSQCSKLLIGQKFMVVEGMVFC                                                                  | SVECKRMMS-----                             |      |      |      |      |      |
| <b>DmTes</b>     | CAGVQCSKPLIGGRFCVKENMPFC                                                                  | SPTCVRSLIN-----                            |      |      |      |      |      |
| <b>ChTes</b>     | FRCLACSEPMLGKQFIYKNKDVYCS                                                                 | GACARK-----                                |      |      |      |      |      |
| <b>OcPkTesL</b>  | FNCSQCSKPLVVGQKFLPREEKIFCSKDC                                                             | CARKAKKNEA-----                            |      |      |      |      |      |
| <b>OlPkTesL</b>  | FRCSQCSKSLVVGQKFLPKNGKIFCSKAC                                                             | WKKSNDR-----                               |      |      |      |      |      |
| <b>OspPkTesL</b> | FKCSQCSKSLVVGQKFLPKNDKIFCSKAC                                                             | ARKSIGQ-----                               |      |      |      |      |      |
| <b>ScPkTesL</b>  | FTCHTCKKSLVVGKPFLLPRLDHI                                                                  | FCRACYKVYKEAN-MELAGTPEVK-----              |      |      |      |      |      |
| <b>AqPkTesL</b>  | FKCRTCKKVLVDQPFLLPKSSKIFCSKE                                                              | CFREYRDNSSQRPFISRQDQSAPPSF-----            |      |      |      |      |      |
| <b>EmPkTesL</b>  | FKCSHCCKSLVVGKPFLLPKNRKVYCSKTC                                                            | CAREDKDSSK-----                            |      |      |      |      |      |
| <b>AvPkTesL</b>  | FKCHYCVSLLGSPFLLPKGSSLYCSKICYKS                                                           | ---RKN-----                                |      |      |      |      |      |
| <b>OmPkTesL</b>  | FRCNFCVSLGSPFLLPKGNLYCSKDCYKSDKFRKTL                                                      | -----                                      |      |      |      |      |      |
| <b>MLPkTesL</b>  | YACSECKTSLVNRTEMPTEYVYCSKNCYRCHESLRKTKGK                                                  | -----                                      |      |      |      |      |      |
| <b>SrPkTesL</b>  | FVCAACHQELHGRVCVPRDGRLYCREDYDRI                                                           | FKKIARKSMRSKPRVRAALGESDIWSMAQDF-----       |      |      |      |      |      |

|                  | 1340                                                                                      | 1350                                        | 1360 | 1370 | 1380 | 1390 | 1400 |
|------------------|-------------------------------------------------------------------------------------------|---------------------------------------------|------|------|------|------|------|
|                  | ..... ..... ..... ..... ..... ..... ..... ..... ..... ..... ..... ..... ..... ..... ..... |                                             |      |      |      |      |      |
| <b>MmPkL1</b>    | SLLLSPALNYKFPGLSGNADDTLSRKLD                                                              | DDVSLASRQAGAFANEEFWKARVEQEASEDPEEWAEHEDYMTQ |      |      |      |      |      |
| <b>MmPkL2</b>    | MLNQHSQQLQVSSNRLSADVDP-LSVQMDLLSLSS-QTPSLNRDP                                             | IWRSREEPFHYGNKMEQNQSQSPL-Q                  |      |      |      |      |      |
| <b>MmPkL3</b>    |                                                                                           |                                             |      |      |      |      |      |
| <b>DmPk</b>      | HASSPPMSPQQQQQHQATFNQAMYQMOSQ                                                             | QMEAAAGGLVDQSKSYAASDSDAGVVKDLEHGGHMGGD-L    |      |      |      |      |      |
| <b>DmEsn</b>     | RERDPGRKAHHGHPKATGSAGDLLERQERQ                                                            | RMEAAG-----VADLLLGGGVPG----                 |      |      |      |      |      |
| <b>ChPk</b>      | SSTMSPEPVRKIVEIRSKASYRSSLDKYGLAAAEKIGDIVRN                                                | -----                                       |      |      |      |      |      |
| <b>TaPk</b>      | RGQLNVIQNSSERKLNQSTNRKYWNRHEQDHIGSSE                                                      | -----                                       |      |      |      |      |      |
| <b>MmTes</b>     | -----                                                                                     |                                             |      |      |      |      |      |
| <b>DmTes</b>     | -----                                                                                     |                                             |      |      |      |      |      |
| <b>ChTes</b>     | -----                                                                                     |                                             |      |      |      |      |      |
| <b>OcPkTesL</b>  | -----                                                                                     |                                             |      |      |      |      |      |
| <b>OlPkTesL</b>  | -----                                                                                     |                                             |      |      |      |      |      |
| <b>OspPkTesL</b> | -----                                                                                     |                                             |      |      |      |      |      |
| <b>ScPkTesL</b>  | -----                                                                                     |                                             |      |      |      |      |      |
| <b>AqPkTesL</b>  | -----                                                                                     |                                             |      |      |      |      |      |
| <b>EmPkTesL</b>  | -----                                                                                     |                                             |      |      |      |      |      |
| <b>AvPkTesL</b>  | -----                                                                                     |                                             |      |      |      |      |      |
| <b>OmPkTesL</b>  | -----                                                                                     |                                             |      |      |      |      |      |
| <b>MLPkTesL</b>  | -----                                                                                     |                                             |      |      |      |      |      |
| <b>SrPkTesL</b>  | -----                                                                                     |                                             |      |      |      |      |      |

|                  | 1410                                                                  | 1420           | 1430           | 1440      | 1450             | 1460        | 1470 |
|------------------|-----------------------------------------------------------------------|----------------|----------------|-----------|------------------|-------------|------|
|                  | .... .... .... .... .... .... .... .... .... .... .... .... .... .... |                |                |           |                  |             |      |
| <b>MmPkL1</b>    | LLLKFGDKNLFQQ--                                                       | QSSEVDPRASEHWI | PDNMVTNKPEVKPN | ---       | HQGLASKKYQSDMYWA | QSQDGLG     |      |
| <b>MmPkL2</b>    | LLSQCNIRTSYSPGG                                                       | QGAGAQPDMWAKHF | SNPKRSSMALKGHG | GSFIQECRE | YYPGR            | LMSQESYSDMS |      |
| <b>MmPkL3</b>    |                                                                       |                | TVTTPLTTS      |           |                  |             |      |
| <b>DmPk</b>      | TDFSGGRASSTSQNL                                                       | SPLNSPGDFQPHFL | PKPMELQRDGV    |           |                  |             | YN   |
| <b>DmEsn</b>     |                                                                       |                | MPRPAHPPP      |           |                  |             | ID   |
| <b>ChPk</b>      |                                                                       |                | MPNGGVIKEESD   |           |                  |             | EK   |
| <b>TaPk</b>      |                                                                       |                |                |           |                  |             | VIP  |
| <b>MmTes</b>     |                                                                       |                |                |           |                  |             |      |
| <b>DmTes</b>     |                                                                       |                |                |           |                  |             |      |
| <b>ChTes</b>     |                                                                       |                |                |           |                  |             |      |
| <b>OcPkTesL</b>  |                                                                       |                |                |           |                  |             |      |
| <b>OlPkTesL</b>  |                                                                       |                |                |           |                  |             |      |
| <b>OspPkTesL</b> |                                                                       |                |                |           |                  |             |      |
| <b>ScPkTesL</b>  |                                                                       |                |                |           |                  |             |      |
| <b>AqPkTesL</b>  |                                                                       |                |                |           |                  |             |      |
| <b>EmPkTesL</b>  |                                                                       |                |                |           |                  |             |      |
| <b>AvPkTesL</b>  |                                                                       |                |                |           |                  |             |      |
| <b>OmPkTesL</b>  |                                                                       |                |                |           |                  |             |      |
| <b>MLPkTesL</b>  |                                                                       |                |                |           |                  |             |      |
| <b>SrPkTesL</b>  |                                                                       |                |                |           |                  |             |      |

|                  | 1480                                                                  | 1490           | 1500          | 1510          | 1520         | 1530       | 1540              |
|------------------|-----------------------------------------------------------------------|----------------|---------------|---------------|--------------|------------|-------------------|
|                  | .... .... .... .... .... .... .... .... .... .... .... .... .... .... |                |               |               |              |            |                   |
| <b>MmPkL1</b>    | DSAYGSHPGPASSRRL                                                      | QELDL-D-HGAAGY | THDQSQWYEDSLE | CLSDLKP-EQ    | SIRDSMDSLALS | SNITGAS    |                   |
| <b>MmPkL2</b>    | QSFSNETRGSIPVPK                                                       | YEEEEEEEEEGG   | I             | STQOCRPRRPLSS | LKYTEDMTPTEQ | TPRGS      | MESLALS           |
| <b>MmPkL3</b>    | TASFSATEG                                                             |                |               |               |              |            | TSETASKGTCTK      |
| <b>DmPk</b>      | FNEMSSNLDAAWSAK                                                       | PTNSYHLQRQLLEN | PHTASMP       | ELAGKLVAPP    | AHMQHLSQLH   | VSSHQFQQHE | YAD               |
| <b>DmEsn</b>     | LTELGISLDNICAGD                                                       | --KSIFGDTQTL   | TN---         | SMPDML        |              |            | LSKADDSHSYQSIDKIN |
| <b>ChPk</b>      | DETSSTCSSVASSRA                                                       | KELPSFP        | PPSNRHSK      | KPILRVPPK     | QRPKPTGPEI   | WIDMVP     | PKPEATTHRQ        |
| <b>TaPk</b>      | ESFTGASSGLAYSRS                                                       |                |               |               |              |            | QKLNSYRSRDNNAEF   |
| <b>MmTes</b>     |                                                                       |                |               |               |              |            |                   |
| <b>DmTes</b>     |                                                                       |                |               |               |              |            |                   |
| <b>ChTes</b>     |                                                                       |                |               |               |              |            |                   |
| <b>OcPkTesL</b>  |                                                                       |                |               |               |              |            |                   |
| <b>OlPkTesL</b>  |                                                                       |                |               |               |              |            |                   |
| <b>OspPkTesL</b> |                                                                       |                |               |               |              |            |                   |
| <b>ScPkTesL</b>  |                                                                       |                |               |               |              |            |                   |
| <b>AqPkTesL</b>  |                                                                       |                |               |               |              |            |                   |
| <b>EmPkTesL</b>  |                                                                       |                |               |               |              |            |                   |
| <b>AvPkTesL</b>  |                                                                       |                |               |               |              |            |                   |
| <b>OmPkTesL</b>  |                                                                       |                |               |               |              |            |                   |
| <b>MLPkTesL</b>  |                                                                       |                |               |               |              |            |                   |
| <b>SrPkTesL</b>  |                                                                       |                |               |               |              |            |                   |

|                  | 1550                                                                     | 1560 | 1570 | 1580 | 1590 | 1600 | 1610 |
|------------------|--------------------------------------------------------------------------|------|------|------|------|------|------|
|                  | .... .... .... .... .... .... .... .... .... .... .... .... .... ....    |      |      |      |      |      |      |
| <b>MmPkL1</b>    | VDGESKPR--PSLYSLQNFEEIEAEDC-EKMSNMGTLNSSMLHRSAESLQSLNSGLCPEKILPEEKPAHL   |      |      |      |      |      |      |
| <b>MmPkL2</b>    | AEGGAKRQEHLRSRFSMPDLKSKDSGMNVSEKLSNMGTLNSSMQFRSAESVRSLLSAQQYQEMEGNLHQLSN |      |      |      |      |      |      |
| <b>MmPkL3</b>    | AEPAAAGPE-----EPSHFRLRGAPHRHSMPELGLRSAPEPPTESPGH                         |      |      |      |      |      |      |
| <b>DmPk</b>      | ILHPPPPP--PGEIPELPTPNLSVASTALPPELMGSPTHSAGDRSLNTPMSTQSASHAPPHPVSIILSGAS  |      |      |      |      |      |      |
| <b>DmEsn</b>     | LNSPS-----NSDLTQSTQELANELELD-NEPVRELPDGYEQLFANNRNQEHPAEQYD---            |      |      |      |      |      |      |
| <b>ChPk</b>      | QSVRSMRS-----NRSTTSTKKYGDAMSHLNGNDTIERLVQGERQINRRHRRRKVDDSYFSDY          |      |      |      |      |      |      |
| <b>TaPk</b>      | SKNNSNIR-----RSRSRSNHGDSAQSNPNNQIEVETASANDHYNY                           |      |      |      |      |      |      |
| <b>MmTes</b>     | -----                                                                    |      |      |      |      |      |      |
| <b>DmTes</b>     | -----                                                                    |      |      |      |      |      |      |
| <b>ChTes</b>     | -----                                                                    |      |      |      |      |      |      |
| <b>OcPkTesL</b>  | -----                                                                    |      |      |      |      |      |      |
| <b>OlPkTesL</b>  | -----                                                                    |      |      |      |      |      |      |
| <b>OspPkTesL</b> | -----                                                                    |      |      |      |      |      |      |
| <b>ScPkTesL</b>  | -----                                                                    |      |      |      |      |      |      |
| <b>AqPkTesL</b>  | -----                                                                    |      |      |      |      |      |      |
| <b>EmPkTesL</b>  | -----                                                                    |      |      |      |      |      |      |
| <b>AvPkTesL</b>  | -----                                                                    |      |      |      |      |      |      |
| <b>OmPkTesL</b>  | -----                                                                    |      |      |      |      |      |      |
| <b>MlPkTesL</b>  | -----                                                                    |      |      |      |      |      |      |
| <b>SrPkTesL</b>  | -----                                                                    |      |      |      |      |      |      |

|                  | 1620                                                                     | 1630 | 1640 | 1650 | 1660 | 1670 | 1680 |
|------------------|--------------------------------------------------------------------------|------|------|------|------|------|------|
|                  | .... .... .... .... .... .... .... .... .... .... .... .... .... ....    |      |      |      |      |      |      |
| <b>MmPkL1</b>    | PV-LRRSKSQSRPQQ--VKFSDDDVIDNGSYDIE-IRQPPMSERTRRRRAYHFEERGSRPHHHRHRRSRKSR |      |      |      |      |      |      |
| <b>MmPkL2</b>    | PLGYRDLQSHGRMHQS-FDFDGGIASSKLPQEGVHIQPMSETRRRRTTSRDD-NRRFRPHRSRRSRRSR    |      |      |      |      |      |      |
| <b>MmPkL3</b>    | PAPHPDDNAFGRQSTPRVSFRDPLVSEGGPRRT-LSAPPAQRRRPRSPPPRTPSCHHHHHHRRRRQRHRR   |      |      |      |      |      |      |
| <b>DmPk</b>      | SSSPMSGEPAKKKGVRFEGIPDTLPRSRSYSGNGAGTSGGGERERDRDKDKEGGGRHGHGHSSRRRRRRK   |      |      |      |      |      |      |
| <b>DmEsn</b>     | -DEQLDNRPMK--EVRFHSVQDTMSRSKSYTDNSNARR-----RRRRRNQ                       |      |      |      |      |      |      |
| <b>ChPk</b>      | EVERRKRTQRRKQTPLVYQMDDEKPNIPMLTVKSRSTESLDAGKARVAGRRDE-----RDGKKKR        |      |      |      |      |      |      |
| <b>TaPk</b>      | NNPTKNPQHRKSPKQKKYTKNETMALEGPSSELKFKKYSSIDRIGEGIAYAQP-----LDRIRE         |      |      |      |      |      |      |
| <b>MmTes</b>     | -----                                                                    |      |      |      |      |      |      |
| <b>DmTes</b>     | -----                                                                    |      |      |      |      |      |      |
| <b>ChTes</b>     | -----                                                                    |      |      |      |      |      |      |
| <b>OcPkTesL</b>  | -----                                                                    |      |      |      |      |      |      |
| <b>OlPkTesL</b>  | -----                                                                    |      |      |      |      |      |      |
| <b>OspPkTesL</b> | -----                                                                    |      |      |      |      |      |      |
| <b>ScPkTesL</b>  | -----                                                                    |      |      |      |      |      |      |
| <b>AqPkTesL</b>  | -----                                                                    |      |      |      |      |      |      |
| <b>EmPkTesL</b>  | -----                                                                    |      |      |      |      |      |      |
| <b>AvPkTesL</b>  | -----                                                                    |      |      |      |      |      |      |
| <b>OmPkTesL</b>  | -----                                                                    |      |      |      |      |      |      |
| <b>MlPkTesL</b>  | -----                                                                    |      |      |      |      |      |      |
| <b>SrPkTesL</b>  | -----                                                                    |      |      |      |      |      |      |

|                  | 1690                                                                  | 1700                  | 1710             | 1720       | 1730     | 1740       | 1750         |
|------------------|-----------------------------------------------------------------------|-----------------------|------------------|------------|----------|------------|--------------|
|                  | .... .... .... .... .... .... .... .... .... .... .... .... .... .... |                       |                  |            |          |            |              |
| <b>MmPkL1</b>    | SDNALNLVTERKYS                                                        | --KDRLRLYTPDNYEKFIQNK | SARELQAYMQNANLYS | QYAHATS    | SDYALQNP | GMNR       |              |
| <b>MmPkL2</b>    | SDNALHLASEREVI                                                        | ARLKERPPLRARE         | YDQFMQRQSFQES    | LGQGSRRDLY | SQCPR    | TVSDLALQNA | FGER         |
| <b>MmPkL3</b>    | RG-----                                                               | SHHHHHHPGRHG          | HRC              | DLGSGSDSG  | SCSSSP   | -----      |              |
| <b>DmPk</b>      | SSSSSSHHRSGSG                                                         | HR-----               | SHSTTRADTY       | YAPAQPL    | SSSYQGPP | SVLQAANLV  | HESPSRQQRERE |
| <b>DmEsn</b>     | SRSSSEMQINQ                                                           | TNLR-----             | LHN---           | AQTQVGT    | TPLNLL   | NN-----    |              |
| <b>ChPk</b>      | TKSETNLTNSK                                                           | NYKS-----             | KNDAVANL         | RRLNIDV    | NSPKK    | QSYN-----  |              |
| <b>TaPk</b>      | ADQSILVAKGY                                                           | KKSE-----             | -----            | -----      | -----    | -----      |              |
| <b>MmTes</b>     | -----                                                                 | -----                 | -----            | -----      | -----    | -----      |              |
| <b>DmTes</b>     | -----                                                                 | -----                 | -----            | -----      | -----    | -----      |              |
| <b>ChTes</b>     | -----                                                                 | -----                 | -----            | -----      | -----    | -----      |              |
| <b>OcPkTesL</b>  | -----                                                                 | -----                 | -----            | -----      | -----    | -----      |              |
| <b>OlPkTesL</b>  | -----                                                                 | -----                 | -----            | -----      | -----    | -----      |              |
| <b>OspPkTesL</b> | -----                                                                 | -----                 | -----            | -----      | -----    | -----      |              |
| <b>ScPkTesL</b>  | -----                                                                 | -----                 | -----            | -----      | -----    | -----      |              |
| <b>AqPkTesL</b>  | -----                                                                 | -----                 | -----            | -----      | -----    | -----      |              |
| <b>EmPkTesL</b>  | -----                                                                 | -----                 | -----            | -----      | -----    | -----      |              |
| <b>AvPkTesL</b>  | -----                                                                 | -----                 | -----            | -----      | -----    | -----      |              |
| <b>OmPkTesL</b>  | -----                                                                 | -----                 | -----            | -----      | -----    | -----      |              |
| <b>MLPkTesL</b>  | -----                                                                 | -----                 | -----            | -----      | -----    | -----      |              |
| <b>SrPkTesL</b>  | -----                                                                 | -----                 | -----            | -----      | -----    | -----      |              |

|                  | 1760                                                             | 1770        | 1780     | 1790     | 1800    | 1810    | 1820                            |
|------------------|------------------------------------------------------------------|-------------|----------|----------|---------|---------|---------------------------------|
|                  | .... .... .... .... .... .... .... .... .... .... .... .... .... |             |          |          |         |         |                                 |
| <b>MmPkL1</b>    | FLGLCGEDDDSW                                                     | CSSSTSSSDSE | EEGYFLGQ | PIQPRPQR | FYYTDDL | SSPAS-  | ALPTPQFTQRTT----                |
| <b>MmPkL2</b>    | WGPYFTEYD--                                                      | WCSTCSSSE   | SDNEGYFL | GEPIQP   | PARLRY  | VTSDELL | HKYSSYGVPKSSTLGGRG----          |
| <b>MmPkL3</b>    | -----                                                            | SSPSESSE    | DDGFFL   | GERIPL   | PPHLCR  | PRTTQDT | STETFNSPAQP--LVQES----          |
| <b>DmPk</b>      | RERERE                                                           | EESDVC      | STCSSSS  | SSSEDY   | MMYQLP  | QRRHYG  | VRVSYVPNDALAYDRKRKPSE-----      |
| <b>DmEsn</b>     | ----LDN                                                          | CDVASI      | CSTCSS   | SSSDMD-  | DYVYRL  | PARKHY  | GGVRVAYVPNDALAYERKKKMAQDSSLAPGA |
| <b>ChPk</b>      | -----                                                            | KMELSK      | KATNKK   | TESNDR   | KTARS   | FGMFA   | EDQQMTRIN                       |
| <b>TaPk</b>      | -----                                                            | CITGSS      | DDSQ     | PDTN     | VTFNL   | VGKLDI  | QRGKSPQKVSTANSFNESRKEKKVRIVD--- |
| <b>MmTes</b>     | -----                                                            | -----       | -----    | -----    | -----   | -----   |                                 |
| <b>DmTes</b>     | -----                                                            | -----       | -----    | -----    | -----   | -----   |                                 |
| <b>ChTes</b>     | -----                                                            | -----       | -----    | -----    | -----   | -----   |                                 |
| <b>OcPkTesL</b>  | -----                                                            | -----       | -----    | -----    | -----   | -----   |                                 |
| <b>OlPkTesL</b>  | -----                                                            | -----       | -----    | -----    | -----   | -----   |                                 |
| <b>OspPkTesL</b> | -----                                                            | -----       | -----    | -----    | -----   | -----   |                                 |
| <b>ScPkTesL</b>  | -----                                                            | -----       | -----    | -----    | -----   | -----   |                                 |
| <b>AqPkTesL</b>  | -----                                                            | -----       | -----    | -----    | -----   | -----   |                                 |
| <b>EmPkTesL</b>  | -----                                                            | -----       | -----    | -----    | -----   | -----   |                                 |
| <b>AvPkTesL</b>  | -----                                                            | -----       | -----    | -----    | -----   | -----   |                                 |
| <b>OmPkTesL</b>  | -----                                                            | -----       | -----    | -----    | -----   | -----   |                                 |
| <b>MLPkTesL</b>  | -----                                                            | -----       | -----    | -----    | -----   | -----   |                                 |
| <b>SrPkTesL</b>  | -----                                                            | -----       | -----    | -----    | -----   | -----   |                                 |



|                  | 1830                  | 1840 |
|------------------|-----------------------|------|
|                  | .... .... .... .... . |      |
| <b>MmPkL1</b>    | -----KSKKKKGHKGKNCIIS |      |
| <b>MmPkL2</b>    | -----QLHSRKRQKSKNCIIS |      |
| <b>MmPkL3</b>    | -----HPVMPRQTRDKNCIVA |      |
| <b>DmPk</b>      | ----LGGD-----KDKNCIIS |      |
| <b>DmEsn</b>     | GNASVGGAPAIMHESKNCTIS |      |
| <b>ChPk</b>      | -----KRKSKNQGCVIS     |      |
| <b>TaPk</b>      | -----EAVDKSKCIVM      |      |
| <b>MmTes</b>     | -----                 |      |
| <b>DmTes</b>     | -----                 |      |
| <b>ChTes</b>     | -----                 |      |
| <b>OcPkTesL</b>  | -----                 |      |
| <b>OlPkTesL</b>  | -----                 |      |
| <b>OspPkTesL</b> | -----                 |      |
| <b>ScPkTesL</b>  | -----                 |      |
| <b>AqPkTesL</b>  | -----                 |      |
| <b>EmPkTesL</b>  | -----                 |      |
| <b>AvPkTesL</b>  | -----                 |      |
| <b>OmPkTesL</b>  | -----                 |      |
| <b>MLPkTesL</b>  | -----                 |      |
| <b>SrPkTesL</b>  | -----                 |      |

Abbreviations. Vertebrate: Mm, *Mus musculus*. Hexapoda: Dm, *Drosophila melanogaster*. Cnidaria: Ch, *Clytia hemisphaerica*. Placozoa: Ta, *Trichoplax adhaerens*. Porifera: Aq, *Amphimedon queenslandica*; Av, *Aphrocalistes vastus*; Em, *Ephydatia muelleri*; Oc, *Oscarella carmela*; Ol, *Oscarella lobularis*; Om, *Oopsacas minuta*; Osp, *Oscarella sp.*; Sc, *Sycon ciliatum*. Ctenophora: MI, *Mnemiopsis leidyi*. Choanoflagellata: Sr, *Salpingoeca rosetta*.

**Figure S2.6: Strabismus/Van Gogh alignment.** Threshold for shading has been fixed at 80% for both identity (black) and similarity (grey). The red square indicate the final PDZ binding motif.

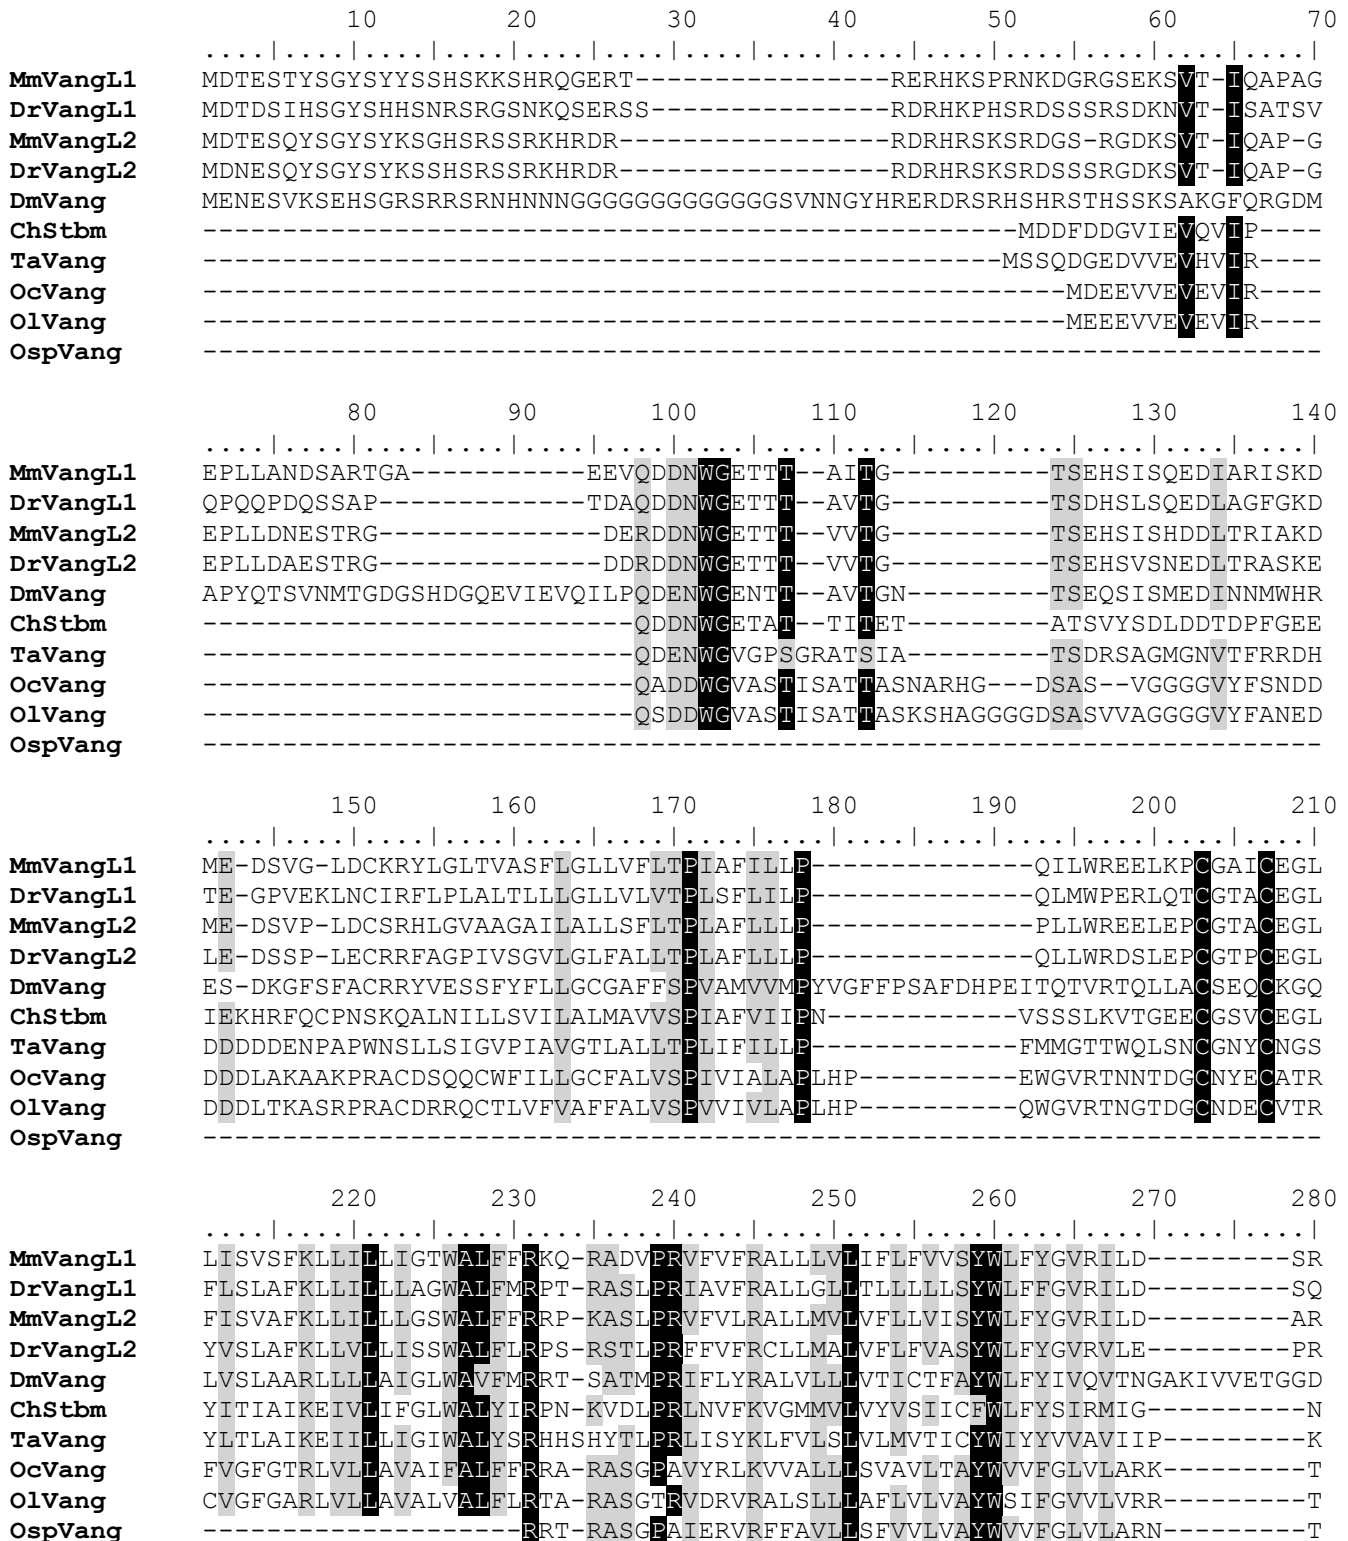

Abbreviations. Vertebrate: Dr, *Danio rerio* and Mm, *Mus musculus*. Hexapoda: Dm, *Drosophila melanogaster*. Cnidaria: Ch, *Clytia hemisphaerica*. Placozoa: Ta, *Trichoplax adhaerens*. Porifera: Oc, *Oscarella carmela*; Ol, *Oscarella lobularis*; Om, *Oopsacas minuta*; Osp, *Oscarella sp.*

290 300 310 320 330 340 350

MmVangL1 DQNYKDIVQYAVSLVDALLFIHYLAIVLLELRQLQ--PMFTLQVVRSTDGESRFYSLGHLSTIQRAALVVL  
 DrVangL1 DDNYQGIVQFAVSLVDALLFIHYLAVVLELRHLQ--PCFSLCVVRSTDGETHHYNMGQLSTIQRAALVIL  
 MmVangL2 ERSYQGIVQFAVSLVDALLFVHYLAVVLELRQLQ--PQFTLKVVRSTDGASRFYNVGHLSTIQRAAVWIL  
 DrVangL2 ERDYRGIVGYAVSLVDALLFIQYLALVLEVRHLR--PAFCLKVVRITDGAERFYNVGHLSTIQRAAVWVL  
 DmVang AVDYKSLVGYATNFVDITLFIHYVAVVLELRHQQ--PCYYIKIIRSPDGVSRSYMLGQLSTIQRAAVWVL  
 ChStbm GTNQYLTVSFASSFLDAMFLHYMALVLMWIRPME--KVYTVSIRNVDMRRYINIGQSSIQKAAVFCL  
 TaVang SSDYASIVDLAVSLVDIFLFLHYISLILLETIRQQRNHTQFILKVVDPDGQQQYVHLHRTSIQLAALTIL  
 OcVang VGEYNNVVLGFATSLLDLAEFLVHYVTIVLTEVRLR--ARYCARVTRITDGVTRHYSLVQSVQEAAYTIL  
 OlVang TREYNTILAYATSLLDLAEFLHYVAVVLELRRLR--ARYCVRVTRAGDGTTRHYAVSAQTVQETAHTIL  
 OspVang IDEYNTVLAYATSLLDLAEFLHYVAVVLELRRLR--ARYCVRVTRAHDGTTTRHYAVSAQSIQETAYTVL

360 370 380 390 400 410 420

MmVangL1 ENYYKDFTIYNP----NLLTASKFRAAKHMAGLKVYVND---GPSNATGQSRAMIAAAR-----RRDS  
 DrVangL1 EHYYKDFTVHNP----ALLTAAKSRAAKHLAAGLKVYVNDG--AGSDAATAQSRAKMAAAR-----QRDT  
 MmVangL2 EKYYHDFPVYNP----ALLNLPKSVLAKKVSQFKVYSLGEE--NSTNNSTGQSRAVIAAAR-----RRDN  
 DrVangL2 DHYYTDFPVYNP----ALLNLPKSVLAKKVSQFKVYSLGEE--NSTNNSTGQSRAMIAAAR-----RRDN  
 DmVang QHYVDFPIFNPYLERIPISVSKSQRNKISNSFKYEVVDG--VSNSQQSQSRAVLAANAR-----RRDS  
 ChStbm ERYIIDFTIYNP----YMPRPQSRTKINKLAGLKIYDLDGK--GDGTLTQQASKAFIAAAG-----RRKE  
 TaVang QYYVDFPIFNPYLERIPISVSKSQRNKISNSFKYEVVDG--VSNSQQSQSRAVLAANAR-----RRDS  
 OcVang RAYVDFPDPRAP--MPYARHPLKHYKNNMAGLKFYDNDGGDEEGVASLAGSRVRSVHRGR--RRNQRV  
 OlVang RSYYVDFPDPRAP--QPARYPMRHYKNNVAGLKFYDNDGGDEEGVASLAGSRARSHGGGGRRRRNRRT  
 OspVang RAYVDFPDPRAP--QPARYNPLRHYKNNVAGLKFYDNDGGDEEGVASLAGSRARSSQGGG--RRNRRA

430 440 450 460 470 480 490

MmVangL1 SHNELYYEEAEHERRVKKRRARLVVAVEEAFTHIQRLQABEQQ---KSPGEVMDPREAAQATFPSMARAL  
 DrVangL1 SHNELYYEEAEHRRVRKRKRARLVVAVEEAFTHVRRRLQDEEK---KPPGDEMMDPREAAQATFPSMARAL  
 MmVangL2 SHNEYYYEEAEHERRVKKRRARLVVAVEEAFTHIKRLQEEEQ---KNPREVMDPREAAQATFASMARAM  
 DrVangL2 SHNEYYYEEAEEMDRVRKRKRARLVVAVEEAFTHIKRLQDEEAAAAPKHPREVMDPREAAQATFAPMARAM  
 DmVang SHNERFYEEHEYERRVKKRRARLITAAEEAFTHIKRIHNEPA-----PALPLDQEEAASAVFPSMARAL  
 ChStbm GRNDRFYEEQELDRIRKRKRARLVAAEEAFGHVARLNAFDSS---KKADGSMDEEAAQAVFPTLARPL  
 TaVang NRNDRYHNETEFYKRIDKRRARLITAAEEAFETHNRLRQDEQD---RSGPPMNPDDVAHAIFPCMARQL  
 OcVang NHDERYNDIEIHQKKALRRKARLITAAEEAFSVIRATR-----SGKMSSQEEAASIFPSMARPL  
 OlVang NHDDRYNDIEIHQKKALRRKARLITAAEEAFSVIRATR-----SGKMNADAAAASIFPSMARPL  
 OspVang NHDERYNDIEIHQKKTLLRRKARLVSAEEAFGVIRATR-----SGKMSAHEAAAASIFPSMARPL

500 510 520 530 540 550 560

MmVangL1 QKYLRTTTRQQHYHSMESIQLHLAFICITNSMTPKAFLELYLSAGPTLQ--YDKDR---WLSTQWRLISEE  
 DrVangL1 QKYLRTTTRQQHCHSMDSIQAHLAFICITNMTPKAFLESYLTAGPTLQ--YGRES---SQRHWTLVSEA  
 MmVangL2 QKYLRTTTRQQPYHTMESIQLHLAFICITHDMTPKAFLELYLAAGPTIQ--YHKER---WLAKQWTLVSEE  
 DrVangL2 QKYLRTTTRQQPYHTMESIQLHLAFICITHDMTPKAFLELYLTPGPTMQ--YQREN---GRGQWTLVSEE  
 DmVang QKYLRTTTRQQPHRTFESILKHLAFICITHDLSPRAFLELYLTPGPTMQ--SEKER---RWWQWTLVSEE  
 ChStbm QKYLRTTTRQQLYPLESILKHLAFICISYELSSKAFLELYTCDQPCIS--YVGYD---GR-QEWTLVSDS  
 TaVang QKYLRTATKQQTWYKIDSILRHLSHCVLALGATSKTFLORYLTRHCAIPLLEDDDR---NKPHEWLSLESEL  
 OcVang QKYLRTSTQQARHTAESVNVHLAKCLQEMLTARAFLORYFNPRTCLELEVEKDKGEGGRPLAWRLICDS  
 OlVang QKYLRTATQOARHTAESVNVHLARCLQEMLTARAFLORYFCARTCLELETEKESGSRIG-ALAWRLISDA  
 OspVang QKYLRTATQOARHTAESVNVHLARCLQEMLTARAFLORYFSARTCLELEVEREA--RVG-AQAWRLIGDA

570 580 590 600 610

MmVangL1 AVTNGLRDGVIFVLLKCLDFSLVVNVKKIPFIVLSEEFIDPKSHKFLVLRLOSETSV  
 DrVangL1 SVTSPLRNGSEFQLKSSDFSLVVVTSKTIPLHLKLEEEYVHPKSHKFLVLRLOSETSV  
 MmVangL2 PVTNGLKDGIVFLLKQDFSLVVSTKKVPEFFKLSEEFVDPKSHKFLVLRLOSETSV  
 DrVangL2 PVTAAALRQGLVFSRLRDLFALVVTVTLPPLFNLGEEFIDPKSHKFLVLRLOSETSV  
 DmVang IVSRPIGNECTFQLIQNDVSLMVTVHKLPHFNLAEEVVDPKSNKFLVLRLOSETSV  
 ChStbm SPTRQLNEGTVFQLKHEDISLVIVAVSKLPEVFAMSELPFNGDSNREVFRLNSETSV  
 TaVang PAHKSLEHGAWEVFLKRNEVSLIVSVVRLPOYNITEHTLDHTGRRIRLNPNETSV  
 OcVang SGNKSLERDLVFRLONSEATLVVEVLDLPELRLVGCSEPAKG--FVLKVNSETTV  
 OlVang SGNKMIERDLVFRLONSEATLVVEVLDLPELRLVGCSEPAKG--FVLKVNSETTV  
 OspVang SSKTIERDLVFRLONSEATLVVVVVKDLPELRLVDCPEPTKG--FVLKVNSETTV

PDZ binding motif

Figure S2.7: Maximum likelihood unrooted tree of PET family.

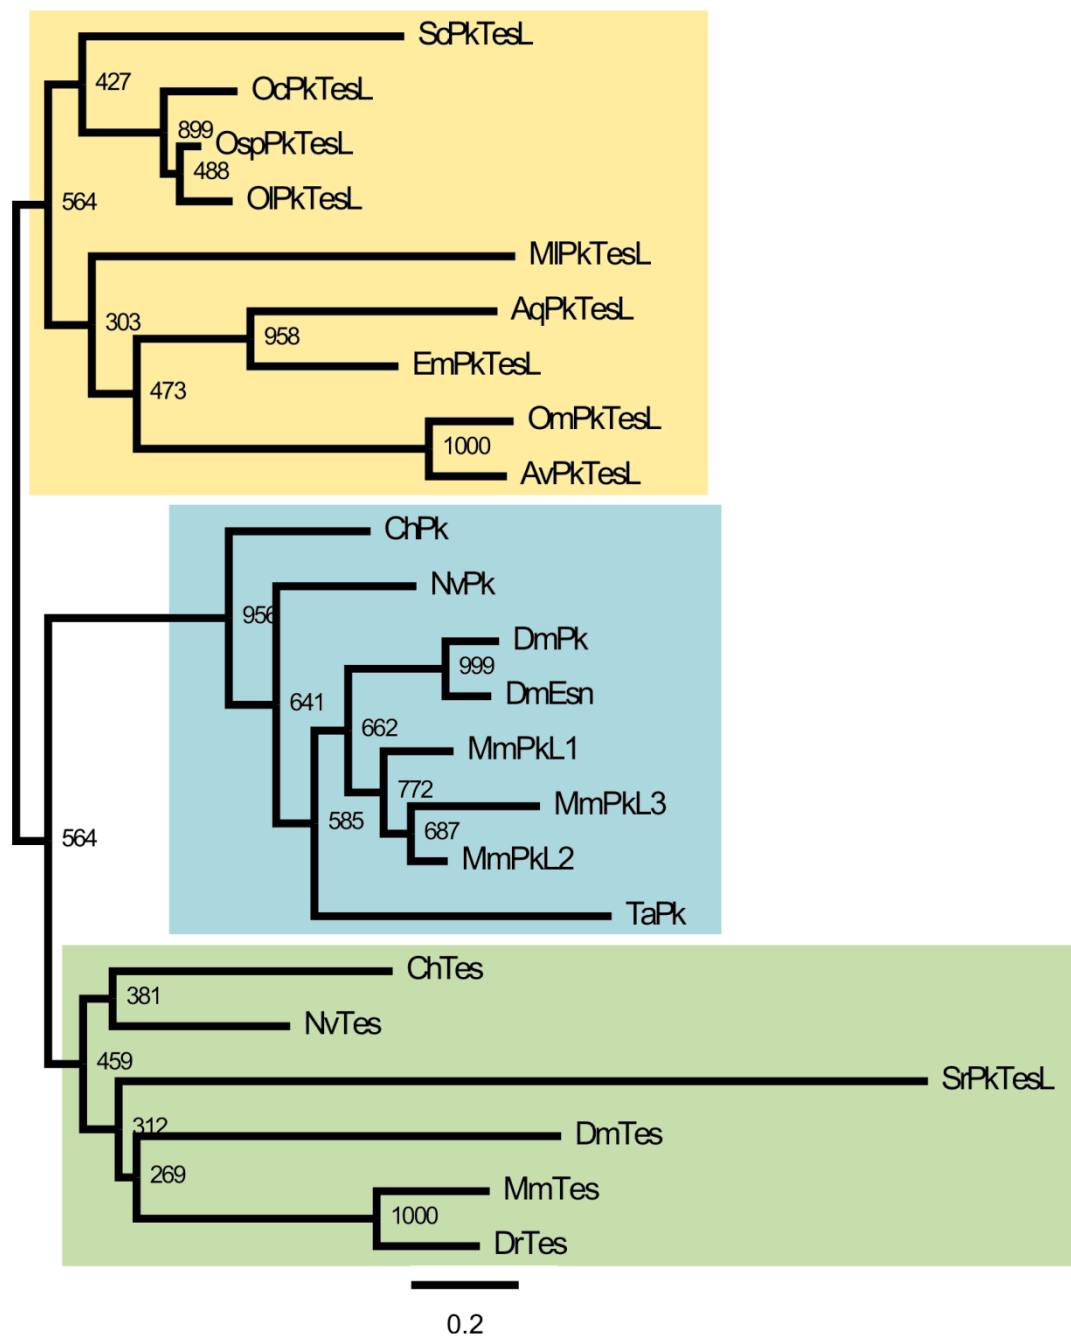

Percentage bootstrap support obtained in maximum likelihood analysis is indicated each node. Abbreviations. Vertebrate: Dr, *Danio rerio*; Gg, *Gallus gallus*; Hs, *Homo sapiens* and Mm, *Mus musculus*. Hexapoda: Dm, *Drosophila melanogaster*. Mollusca: Ac, *Aplysia californica* and Cg, *Crassostrea gigantea*. Ambulacraria: Hp, *Hemicentrotus pulcherrimus*; Sk, *Saccoglossus kowalevskii* and Sp, *Strongylocentrotus purpuratus*. Cnidaria: Ch, *Clytia hemisphaerica*; Nv, *Nematostella vectensis*. Placozoa: Ta, *Trichoplax adhaerens*. Porifera: Aq, *Amphimedon queenslandica*; Av, *Aphrocalistes vastus*; Em, *Ephydatia muelleri*; Oc, *Oscarella carmela*; Ol, *Oscarella lobularis*; Om, *Oopsacas minuta*; Osp, *Oscarella sp.*; Sc, *Sycon ciliatum*. Ctenophora: Ml, *Mnemiopsis leidyi*. Choanoflagellata: Sr, *Salpingoeca rosetta*.

Figure S2.8: Bayesian unrooted tree of PET family.

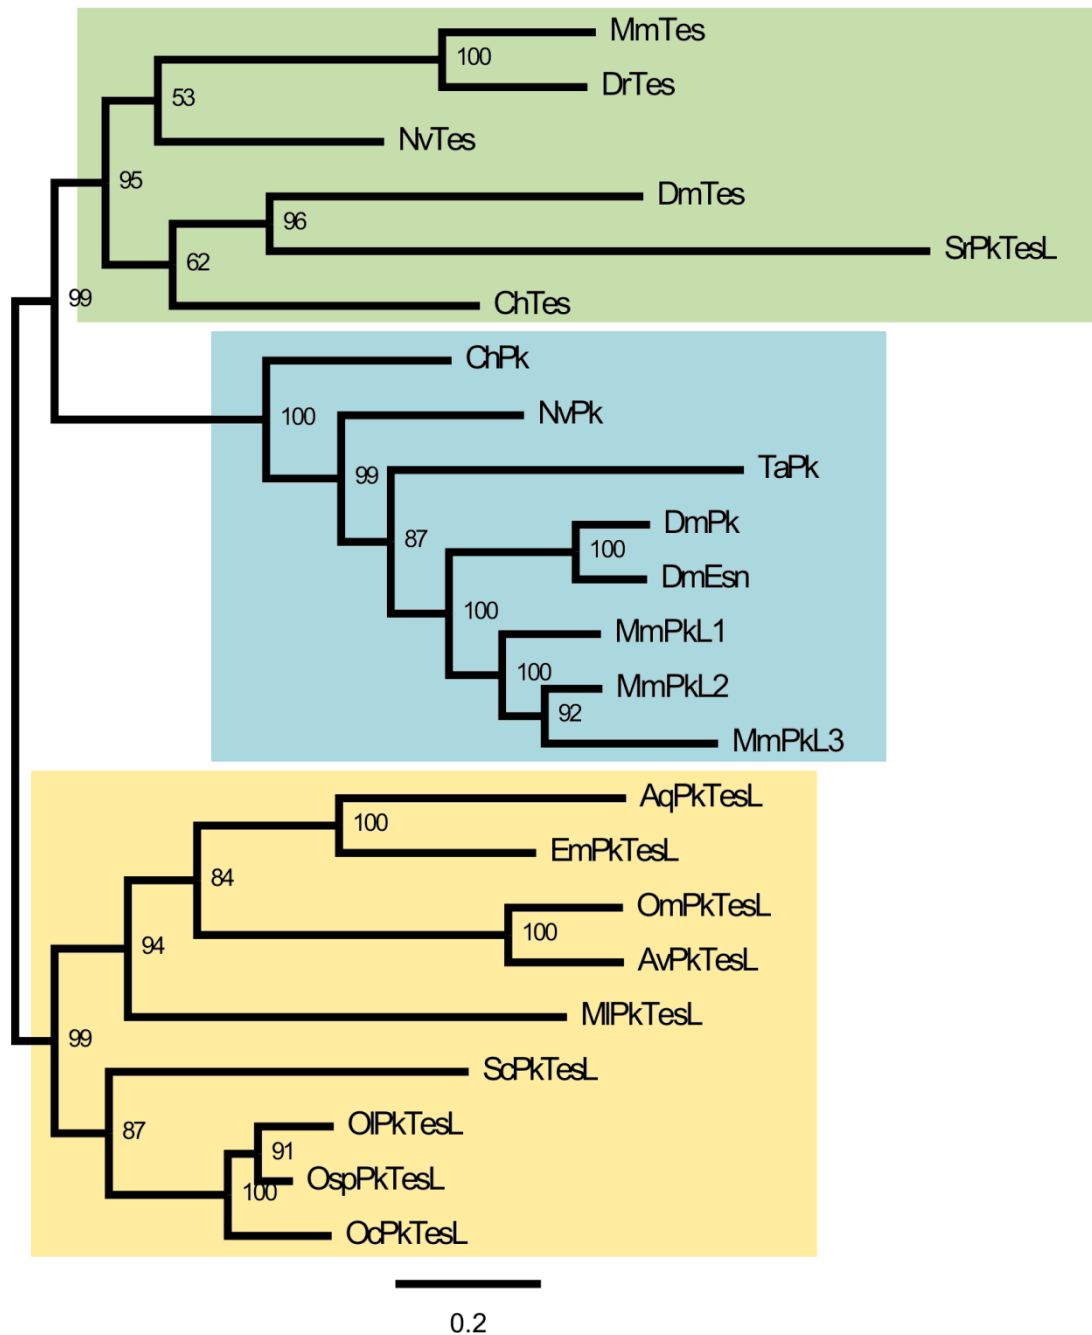

Posterior probability obtained in Bayesian analysis is indicated above each node. Abbreviations. Vertebrate: Dr, *Danio rerio*; Gg, *Gallus gallus*; Hs, *Homo sapiens* and Mm, *Mus musculus*. Hexapoda: Dm, *Drosophila melanogaster*. Mollusca: Ac, *Aplysia californica* and Cg, *Crassostrea gigantea*. Ambulacraria: Hp, *Hemicentrotus pulcherrimus*; Sk, *Saccoglossus kowalevskii* and Sp, *Strongylocentrotus purpuratus*. Cnidaria: Ch, *Clytia hemisphaerica*; Nv, *Nematostella vectensis*. Placozoa: Ta, *Trichoplax adhaerens*. Porifera: Aq, *Amphimedon queenslandica*; Av, *Aphrocalistes vastus*; Em, *Ephydatia muelleri*; Oc, *Oscarella carmela*; Ol, *Oscarella lobularis*; Om, *Oopsacas minuta*; Osp, *Oscarella sp.*; Sc, *Sycon ciliatum*. Ctenophora: Ml, *Mnemiopsis leidyi*. Choanoflagellata: Sr, *Salpingoeca rosetta*.

Figure S2.9: Intro/exon composition of *flamingo* in *Sycon ciliatum*.

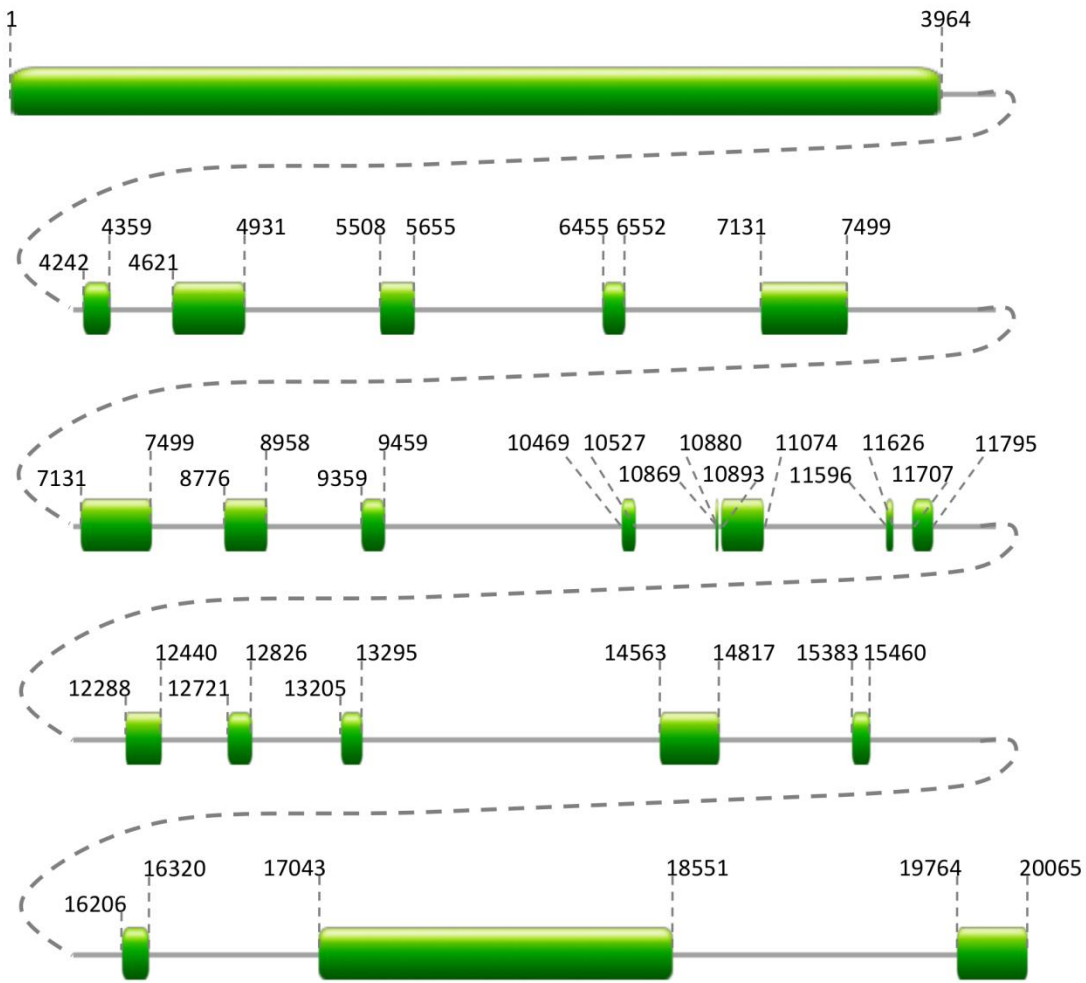

Location of exons is indicated in base pairs along the gene.

**Figure S2.10: Alternative scenario 1 of the PCP players during animal evolution.**

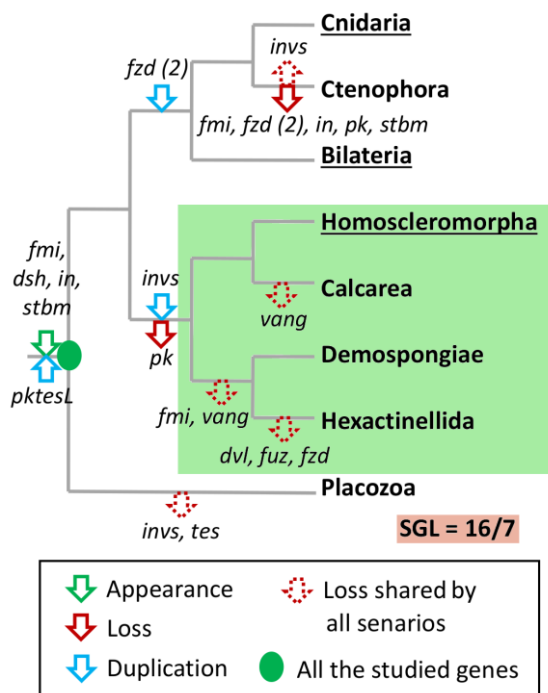

The emergence (green arrows), duplications (blue arrows) and secondarily losses (red arrows) of PCP genes are indicated (16 secondarily gene losses, SGL), based on genome analyses. Abbreviations. *dsh*, *dishevelled*; *fmi*, *flamingo*; *fuz*, *fuzzy*; *fzd*, *frizzled*; *intu*, *inturned*; *invs*, *inversin*; *pktesL*, *prickle-testin like*; *pk*, *prickle*; *tes*, *testin* and *vang*, *van gogh*.

**Figure S2.11: Alternative scenario 2 of the PCP players during animal evolution.**

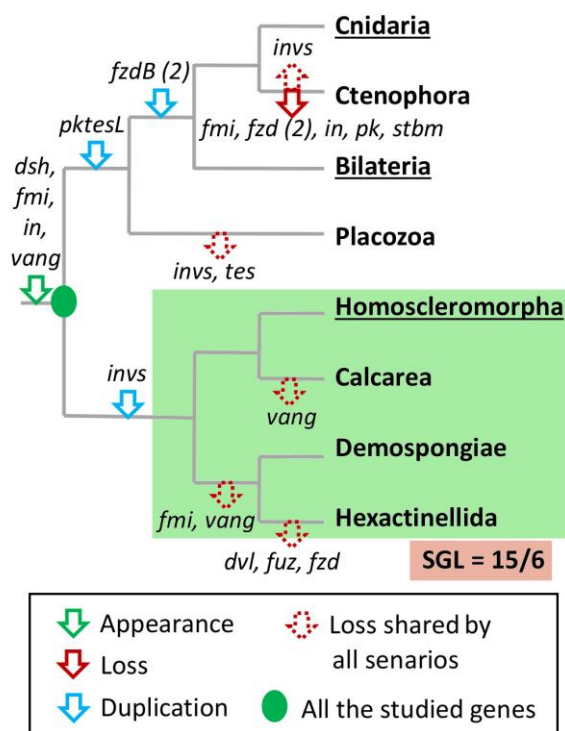

The emergence (green arrows), duplications (blue arrows) and secondarily losses (red arrows) of PCP genes are indicated (15 secondarily gene losses, SGL), based on genome analyses. Abbreviations. *dsh*, *dishevelled*; *fmi*, *flamingo*; *fuz*, *fuzzy*; *fzd*, *frizzled*; *intu*, *inturned*; *invs*, *inversin*; *pktesL*, *prickle-testin like*; *pk*, *prickle*; *tes*, *testin* and *vang*, *van gogh*.

Figure S2.12: Alternative scenario 3 of the PCP players during animal evolution.

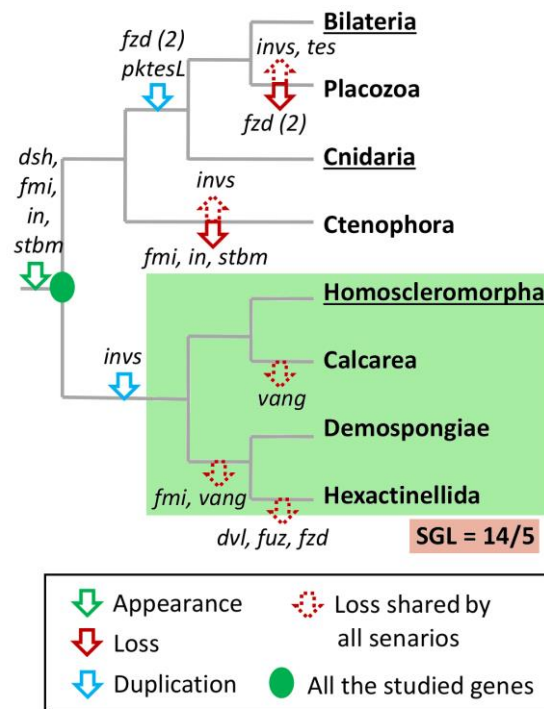

The emergence (green arrows), duplications (blue arrows) and secondarily losses (red arrows) of PCP genes are indicated (14 secondarily gene losses, SGL), based on genome analyses. Abbreviations. *dsh*, *dishevelled*; *fmi*, *flamingo*; *fuz*, *fuzzy*; *fzd*, *frizzled*; *intu*, *inturned*; *invs*, *inversin*; *pktesL*, *prickle-testin like*; *pk*, *prickle*; *tes*, *testin* and *vang*, *van gogh*.
